# Supplementary material for: Which work-related characteristics are most strongly associated with common mental disorders? A cross-sectional study
Source: PubMed Central journal article supplement — BMJ Open. 2018 Aug 5;8(8):e020770. doi: 10.1136/bmjopen-2017-020770 (PMC6078252; doi:10.1136/bmjopen-2017-020770), 2018-08-05
Supplement: bmjopen-2017-020770.draft_revisions.pdf [file bmjopen-2017-020770.draft_revisions.pdf]

# BMJ Open

BMJ Open is committed to open peer review. As part of this commitment we make the peer review history of every article we publish publicly available.

When an article is published we post the peer reviewers' comments and the authors' responses online. We also post the versions of the paper that were used during peer review. These are the versions that the peer review comments apply to.

The versions of the paper that follow are the versions that were submitted during the peer review process. They are not the versions of record or the final published versions. They should not be cited or distributed as the published version of this manuscript.

BMJ Open is an open access journal and the full, final, typeset and author-corrected version of record of the manuscript is available on our site with no access controls, subscription charges or pay-per-view fees (<http://bmjopen.bmj.com>).

If you have any questions on BMJ Open's open peer review process please email [info.bmjopen@bmj.com](mailto:info.bmjopen@bmj.com)

# BMJ Open

## Which work-related characteristics are most strongly associated with common mental disorders?: A cross-sectional study

|                                 |                                                                                                                                                                                                                                                                                                                                                                                                                                                                                                                                                                                                                                                                                                                                                                                                                                                                                                                                                                  |
|---------------------------------|------------------------------------------------------------------------------------------------------------------------------------------------------------------------------------------------------------------------------------------------------------------------------------------------------------------------------------------------------------------------------------------------------------------------------------------------------------------------------------------------------------------------------------------------------------------------------------------------------------------------------------------------------------------------------------------------------------------------------------------------------------------------------------------------------------------------------------------------------------------------------------------------------------------------------------------------------------------|
| Journal:                        | <i>BMJ Open</i>                                                                                                                                                                                                                                                                                                                                                                                                                                                                                                                                                                                                                                                                                                                                                                                                                                                                                                                                                  |
| Manuscript ID                   | bmjopen-2017-020770                                                                                                                                                                                                                                                                                                                                                                                                                                                                                                                                                                                                                                                                                                                                                                                                                                                                                                                                              |
| Article Type:                   | Research                                                                                                                                                                                                                                                                                                                                                                                                                                                                                                                                                                                                                                                                                                                                                                                                                                                                                                                                                         |
| Date Submitted by the Author:   | 28-Nov-2017                                                                                                                                                                                                                                                                                                                                                                                                                                                                                                                                                                                                                                                                                                                                                                                                                                                                                                                                                      |
| Complete List of Authors:       | Riviere, Mathieu; Sorbonne Universités, UPMC Univ Paris 06, INSERM, Institut Pierre Louis d'épidémiologie et de Santé Publique (IPLESP UMRS 1136); Centre Hospitalier Régional, Department of Infectious Diseases Leroyer, Ariane; Centre Hospitalier Regional Universitaire de Lille, Occupational Health<br>Ferreira Carreira, Lionel; Centre Hospitalier Regional Universitaire de Lille, Occupational Health<br>Blanchon, Thierry; Sorbonne Universités, UPMC Univ Paris 06, INSERM, Institut Pierre Louis d'épidémiologie et de Santé Publique (IPLESP UMRS 1136)<br>Plancke, Laurent; Fédération régionale de recherche en psychiatrie et santé mentale Hauts-de-France<br>Melchior, Maria; Sorbonne Universités, UPMC Univ Paris 06, INSERM, Institut Pierre Louis d'épidémiologie et de Santé Publique (IPLESP UMRS 1136)<br>Younès, Nadia; EA 40-47 University of Versailles Saint-Quentin; Academic Unit of psychiatry for adults, Versailles Hospital |
| <b>Primary Subject Heading</b>: | Occupational and environmental medicine                                                                                                                                                                                                                                                                                                                                                                                                                                                                                                                                                                                                                                                                                                                                                                                                                                                                                                                          |
| Secondary Subject Heading:      | Mental health, General practice / Family practice                                                                                                                                                                                                                                                                                                                                                                                                                                                                                                                                                                                                                                                                                                                                                                                                                                                                                                                |
| Keywords:                       | PRIMARY CARE, PSYCHIATRY, OCCUPATIONAL & INDUSTRIAL MEDICINE                                                                                                                                                                                                                                                                                                                                                                                                                                                                                                                                                                                                                                                                                                                                                                                                                                                                                                     |
|                                 |                                                                                                                                                                                                                                                                                                                                                                                                                                                                                                                                                                                                                                                                                                                                                                                                                                                                                                                                                                  |

SCHOLARONE™  
Manuscripts

1  
2 Which work-related characteristics are most strongly associated with common mental  
3 disorders? : A cross-sectional study  
4  
5

6 Mathieu Rivière<sup>a,b</sup>, Ariane Leroyer<sup>c</sup>, Lionel Ferreira Carreira<sup>c</sup>, Thierry Blanchon<sup>a</sup>, Laurent Plancke<sup>d</sup>,  
7  
8 Maria Melchior<sup>a</sup>, Nadia Younès<sup>e,f</sup>  
9

10  
11 a Sorbonne Universités, UPMC Univ Paris 06, INSERM, Institut Pierre Louis d'épidémiologie et de Santé Publique  
12 (IPLESP UMRS 1136), F75013, Paris, France  
13

14 b Department of Infectious Diseases, Centre Hospitalier Régional, Orléans, France  
15

16 c Université Lille Nord de France, Lille, France  
17

18 d Fédération régionale de recherche en santé mentale (F2RSM) Nord - Pas-de-Calais, Lille, France  
19

20 e EA 40-47 University of Versailles Saint-Quentin, Versailles, France  
21

22 f Academic Unit of psychiatry for adults, Versailles Hospital, Versailles, France  
23  
24

25 Word count: 3,109  
26

27 Corresponding author:

28 Mathieu Rivière

29 Réseau Sentinelles, Centre hospitalier régional d'Orléans 1 rue porte Madeleine, 45000 Orléans, France

30 Phone : 00 33 (2) 38 74 40 05. Fax : 00 33 (2) 76 34 16 38

31 E-mail : mathieu.riviere@iplesp.upmc.fr  
32  
33  
34  
35  
36  
37  
38  
39  
40  
41  
42  
43  
44  
45  
46  
47  
48  
49  
50  
51  
52  
53  
54  
55  
56  
57  
58  
59  
60

**ABSTRACT**

OBJECTIVES: Studies exploring work-related risk factors of common mental disorders (CMD) such as major depressive disorder (MDD), generalized anxiety disorder (GAD) or alcohol abuse have generally focused on a limit set of work characteristics. We study, for the first time in a primary care setting, simultaneously multiple workplace risk factors of CMD.

METHOD: We use data from a representative study of working individuals recruited among 2,027 patients of 121 representative general practitioners (GP) in the Nord - Pas-de-Calais region in France (April-August 2014). CMD were assessed using the MINI (Mini International Neuropsychiatric Interview). Six emergent worked-related factors were explored (work intensity, emotional demands, autonomy, social relationships at work, conflict of values, and insecurity of work). Several covariates were considered (patient's, GP's and contextual characteristics). To study the association between workplace risk factors and CMD (MDD; GAD; alcohol abuse) multilevel logistic or Poisson regression models adjusted for covariates were performed.

RESULTS: Among study participants, 389 (19.1%) had current MDD, 522 (25.8%) current GAD and 196 (9.7%) current alcohol abuse. In multivariable analyses adjusted for covariates, MDD/GAD was significantly associated with work intensity (RR=1.16 [1.06 - 1.27]), emotional demands (RR=1.24 [1.13 - 1.35]) and social relations at work (RR=0.78 [0.70 - 0.87]); alcohol abuse was associated with social relations at work (OR=1.31 [1.04 - 1.65]) and autonomy (OR=0.79 [0.64 - 0.98]).

CONCLUSIONS: Several workplace factors are associated with CMD among working individuals seen by a GP. These findings confirm the role of organizational characteristics of work as a correlate of psychological difficulties above and beyond other sources of risk.

Key terms: mental health; primary care; workplace factors

**STRENGTHS AND LIMITATIONS OF THE STUDY**

- Cross-sectional study design
- Study of occupational factors related to common mental disorders among working adults in primary care with a standardized diagnostic tool in a large sample
- The study was conducted in the Nord – Pas-de-Calais region in France, one of the poorest in France thus, this could lead to a high level of psychological disorders
- Selective participation of general practitioners (GP) that may have caused a larger selection of patient of patient with psychological disorders. However GPs were selected to be representative of the region GPs and a random procedure to define patients included in the study limits this bias

## 1 INTRODUCTION

Individuals who are part of the labour force are generally in better health,<sup>1</sup> however work can also have negative effects on somatic and psychosocial health. Work-related diseases have been described and among them, common mental disorders (CMD) such as anxiety, depression and alcohol abuse are the most frequent after musculoskeletal disorders.<sup>2</sup> Work-related CMD are responsible for most of sickness absence and long-term work incapacity.<sup>3</sup> The association between work and CMD is bidirectional: work is a risk factor of poor mental health<sup>4</sup> but the presence of CMD can also influence job performance and well-being.<sup>5,6</sup> Several others risk factors of CMD are already known, even if associations vary from the different disorders. Sociodemographic risk factors include being divorced or widowed, having a low educational level, older age, sex.<sup>7-9</sup> Genetic factors<sup>10</sup> and personal or family history of chronic disease or psychiatric disease are also well-known.<sup>11</sup> Environmental factors (social and material deprivation...) were described and show that individuals with low socio economic status had higher risk of depression.<sup>7,8</sup>

Three main theoretical models have been proposed to explain relations between work characteristics and health. First, Karasek<sup>12</sup> proposed that keys to health are psychological demands, decision latitude and social support. Second, Siegrist<sup>13</sup> proposed that the subjectively ascertained effort-reward balance is what matters most. These two models are the gold standard to study psychosocial risk at work and have a good predictive value but they lack some dimensions to well describe the psychosocial environment at work at the individual level. A third model addressing the role of organizational justice developed by Elovainio allowed interpersonal comparison.<sup>14</sup> Several studies evaluate the impact of work using these theoretical models.<sup>4,15,16</sup> In synthesis, the risk of mental disorders is greater when there is high job demands, low job control, high effort-reward imbalance or low organizational justice. As work organization is evolving, others psychosocial factors described as “emergent factors” appear in the recent studies<sup>17-20</sup>: Workers experiencing high job insecurity or role conflict seem also to have a higher levels of CMD.<sup>17,18</sup> Few studies uses validated diagnostic interviews and many studies investigated separately the diagnosis of MDD (most explored), of GAD and alcohol abuse (less explored).<sup>4,21,22</sup> We aimed to assess the

1  
2 association between GAD, MDD and alcohol abuse in a primary care setting, using validated  
3  
4 diagnostic interviews and combining classical and emergent psychosocial work factors  
5  
6 simultaneously that have not often been studied in literature even less in a population of individuals  
7  
8 consulting their general practitioner (GP).

9  
10 We conducted our research in a primary care setting. Indeed, persons with CMD are frequently  
11  
12 treated by GP either initially or throughout treatment.<sup>23 24</sup> In primary care, the prevalence levels of  
13  
14 CMD are therefore high, ranging from 3%<sup>18</sup> to 25% for anxiety disorders,<sup>9 23-26</sup> 6%<sup>9</sup> to 25% for  
15  
16 depression<sup>7 23-26</sup> and 2%<sup>24</sup> to 11% for alcohol abuse.<sup>23 24</sup> This makes it important to elucidate work  
17  
18 related factors of mental health difficulties in this particular population, considering also several  
19  
20 covariates, at the patient's level, at the GP's level and contextual characteristics.

## 2 METHODS

### 2.1 Design and Study population

Heracles is a cross-sectional study conducted between April and August 2014 among working individuals consulting a primary care physician in the Nord - Pas-de-Calais region in the North of France. The number of subjects needed and the set-up of the study have previously been described<sup>27</sup>. Briefly, we aimed to include 2 000 patients via their GP. Participating GP's were asked to include randomly a maximum of 24 patients who were actively employed and aged 18 to 65 years regardless of the reason of their appointment.

This study was conducted by the Sentinelles network,<sup>28</sup> part of the INSERM-Paris Sorbonne University research unit UMR-S 1136. This research group has a standing authorization from the French independent administrative authority protecting privacy and personal data (CNIL), n°471 393 to conduct research among GPs and their patients.

### 2.2 Data collection

After their regular appointment, GPs interviewed their patients for the purposes of the study. Study questionnaires included information on:

#### 2.2.1 Measurement of common mental disorders

CMDs were measured using a standardised diagnostic interview: the Mini International Neuropsychiatric Interview (MINI). The MINI is a structured clinical interview that enables the diagnosis of psychiatric disorders based on the Diagnosis and Statistical Manual of Mental Disorders, fourth edition (DSM-IV).<sup>29</sup>

In this study, three different diagnoses were ascertained: Major Depressive Disorder (MDD) (during the preceding 2 weeks), Generalised Anxiety Disorder (GAD) (during the preceding 6 months), and alcohol abuse (during the preceding 12 months).



### 2.2.2 Work's factors

We used a national French questionnaire proposed by experts in the field based on the international scientific literature and after auditioning Robert Karasek and Johannes Siegrist.<sup>19</sup> It combines questions measuring demand - control – social support developed in Karasek's model<sup>12</sup> (2 questions about decision latitude, 4 questions about psychological demands and 2 questions about social support) ; questions measuring effort/reward balance in Siegrist's model<sup>13</sup> (3 questions about reward and one question about overinvestment), and questions about organizational justice from Moorman's questionnaire,<sup>30</sup> questions from the Copenhagen Psychosocial Questionnaire<sup>31</sup> and from the General Nordic Questionnaire for Psychological and Social Factors at Work<sup>32</sup> or from Working Conditions and Control Questionnaire (WOCCQ)<sup>33</sup>. Overall, twenty items explore six different areas (Appendix 1): 1) five for the first area related to work intensity and duration (contradictory orders, excessive amounts of work, too much to think about at work, difficulties in balancing work and family life, time needed for work), 2) six items for the second area concerning emotional demands (contacts with customers/beneficiaries, contact with people in distress, conflicts with customers/beneficiaries, the need to hide emotions, fear, exposure to aggressions), 3) two items for the third area concerning autonomy (limited possibility of decision, full and well employment of skills), 4) three items for the fourth area relating quality of social work relations (full-recognition of the work, support from colleagues, support from superior), 5) two items for the fifth area concerning ethical conflicts (possibility to make a work of quality, doing disapproved things) 6) and two items in the last area about insecurity of work (ability to work until retirement, fear of losing job). For four of these items (public contact at work, contact with people in distress, contradictory order, ability to work until retirement) the response was "yes" or "no" and for the other factors the response were "always"/"often"/"sometimes"/"never".

### 2.2.3 Covariates

#### *Patient's characteristics*

We considered already know risk-factors of CMD<sup>7</sup>.

- Past somatic or psychiatric problems;

- Sociodemographic (age, gender, family status, family income, level of education);
- Occupational grade<sup>34</sup>, they were classified in three groups: blue (farmer/manual worker), pink (technician/associate professional/clerk/service worker) and white collars (manager/professional);<sup>35</sup>
- Company size;
- Job instability: a recombined variable of type of contract

#### *Primary care characteristics*<sup>36</sup>

- Reason of medical appointment (somatic, psychological, chronic disease management);
- Sociodemographic (age, gender);
- Practice characteristics (size of practice; easiness with psychological distress issues; opportunity to collaborate with mental health specialists).

#### *Contextual characteristics (by proximity area)*

Contextual characteristics have been shown to be associated with CMD in primary care<sup>7 8</sup>

- Psychiatrists, psychologist and GPs density;
- Social deprivation (loneliness, single parenthood, widowhood/divorce) and material deprivation (unemployment, income, level of not graduated)<sup>37 38</sup>.

### **2.3 Statistical Analyses**

Socio demographic characteristics of all patients were described and associations between these covariates with GAD, MDD and alcohol abuse were studied using the Chi-square test. Covariates associated with the outcomes with  $p < 0.2$  were included in the multivariate analysis.

A value was attributed to each answer of the twenty questions regarding occupational factors. Those factors were regrouped according to the 6 dimensions defined in the Gollac report and in order to be able to compare each dimension a Z-score was calculated for each dimension.<sup>19</sup> In bivariate analysis the dimensions were classified high if the score was above the third quartile and low if not, in multivariable models they were used as continuous variable. To study the association between

1  
2 occupational factors and alcohol we performed multilevel logistic regression models with patient as  
3  
4 level one and geographical area as level two. For GAD/MDD we used multilevel Poisson regression  
5  
6 models because, given the high prevalence of these problems, logistic regression overestimates  
7  
8 relative risks. GAD/MDD or alcohol abuse were the dependent variables and the six occupational  
9  
10 factors were the exposition variables. The models were adjusted for each exposition variable and for  
11  
12 other covariates that were associated with GAD/MDD or alcohol abuse in a multivariable  
13  
14 logistic/Poisson regression model excluding occupational factors. Age, sex and occupational grade  
15  
16 were included directly in the adjustment variable.

17  
18 All analyses were performed using GNU R software version 3.1.1. (lme4 package).  
19  
20  
21  
22  
23  
24  
25  
26  
27  
28  
29  
30  
31  
32  
33  
34  
35  
36  
37  
38  
39  
40  
41  
42  
43  
44  
45  
46  
47  
48  
49  
50  
51  
52  
53  
54  
55  
56  
57  
58  
59  
60

### 3 RESULTS

#### 3.1 Participation and description of the population

Of the 1 000 GPs contacted by mail, 185 accepted to participate (response rate= 18.5%) and 121 completed the study (Figure 1). Participating GPs were more likely to be male (sex ratio=1.82), and to be 50 years or older; they were disseminated throughout the Nord - Pas-de-Calais region (Table 1). Participating GPs were representative of the other GPs in the Nord - Pas-de-Calais region in term of geographical localisation, age and practice and years.

Participating GPs recruited 2 027 patients among which 389 (19.1%) had MDD, 522 (25.8%) GAD and 196 (9.7%) alcohol abuse. Patients were mostly female (53.6%) aged 42.3 years (sd 10.6) on average, mainly living with a partner (76.2%). Patients were pink collar in 60.1% of cases (clerk/service workers and technician/associate professional), 61.3% had graduated from high school and 30.2% had been unemployed in the past. Among participants, 21.0% came to see their GP for psychological reasons (Table 1). Characteristics of patient with MDD, GAD or alcohol abuse are presented in table 2.

The study response rate was 80%: 41 GPs filled a non-respondent form for 495 patients who refused to participate. Non-respondents did not differ from participants in term of age ( $p= 0.47$ ) and sex ( $p=0.23$ ). Comparing with the data of the National Health Insurance for working age patient consulting a GP, participants were older ( $p<0.01$ ) and were similar for sex distribution ( $p=0.08$ ).

**Table 1:** Description of the study population, Héraclès study, France, 2014

|                                 | N    | %    |
|---------------------------------|------|------|
| <b>Work Characteristics</b>     |      |      |
| Work intensity                  |      |      |
| High                            | 437  | 21.6 |
| Low                             | 1588 | 78.3 |
| Emotional demands               |      |      |
| High                            | 476  | 23.5 |
| Low                             | 1549 | 76.4 |
| Autonomy                        |      |      |
| High                            | 598  | 29.5 |
| Low                             | 1427 | 70.4 |
| Conflict of values              |      |      |
| High                            | 685  | 33.8 |
| Low                             | 1340 | 66.1 |
| Social relationships at work    |      |      |
| High                            | 688  | 33.9 |
| Low                             | 1337 | 66.0 |
| Insecurity                      |      |      |
| High                            | 565  | 27.9 |
| Low                             | 1460 | 72.0 |
| <b>Covariates</b>               |      |      |
| <b>Patient Characteristics</b>  |      |      |
| Age group                       |      |      |
| [18-35]                         | 597  | 29.5 |
| [36-50]                         | 872  | 43.1 |
| [51-65]                         | 552  | 27.3 |
| Occupational grade              |      |      |
| Blue collar                     | 273  | 13.9 |
| Pink collar                     | 1185 | 60.1 |
| White collar                    | 513  | 26.0 |
| Educational level               |      |      |
| < High school degree            | 780  | 38.7 |
| ≥ High school degree            | 1238 | 61.3 |
| Family status                   |      |      |
| Lives alone                     | 481  | 23.8 |
| Lives with a partner or parents | 1543 | 76.2 |
| Household income (in €)         |      |      |
| [0-3.000]                       | 491  | 30.6 |
| 3.000 +                         | 1112 | 69.4 |
| Number of worker in the company |      |      |
| 1 to 5                          | 361  | 18.4 |
| 6 to 25                         | 490  | 25.0 |
| 26 to 250                       | 420  | 21.5 |
| 250 +                           | 687  | 35.1 |
| Past psychiatric problems       |      |      |
| Yes                             | 189  | 9.8  |
| No                              | 1735 | 90.2 |
| Past somatic problems           |      |      |
| Yes                             | 559  | 28.9 |
| No                              | 1373 | 71.1 |

**Table 1:** (continued)

|                                                         | N    | %    |
|---------------------------------------------------------|------|------|
| Purpose of consultation with GP                         |      |      |
| Somatic                                                 |      |      |
| Yes                                                     | 1331 | 65.7 |
| No                                                      | 696  | 34.3 |
| Psychological                                           |      |      |
| Yes                                                     | 425  | 21.0 |
| No                                                      | 1602 | 79.0 |
| Chronic disease management                              |      |      |
| Yes                                                     | 313  | 15.4 |
| No                                                      | 1714 | 84.6 |
| Past unemployment                                       |      |      |
| Yes                                                     | 613  | 30.2 |
| No                                                      | 1414 | 69.8 |
| Job instability                                         |      |      |
| Yes                                                     | 522  | 33.0 |
| No                                                      | 1061 | 67.0 |
| <b>GPs characteristics</b>                              |      |      |
| GP's gender                                             |      |      |
| Male                                                    | 1364 | 67.3 |
| Female                                                  | 663  | 32.7 |
| GP's age                                                |      |      |
| [18-39]                                                 | 194  | 9.6  |
| [40-49]                                                 | 626  | 30.9 |
| [50-59]                                                 | 832  | 41.0 |
| 60 +                                                    | 375  | 18.5 |
| Size of practice population                             |      |      |
| 0-500                                                   | 211  | 11.2 |
| 5000 - 1000                                             | 993  | 52.5 |
| 1000- 1500                                              | 433  | 22.9 |
| 1500+                                                   | 253  | 13.4 |
| Easiness with Mental health problems                    |      |      |
| High                                                    | 1600 | 82.6 |
| Low                                                     | 338  | 17.4 |
| High opportunity to work with mental health specialists |      |      |
| High                                                    | 1036 | 52.4 |
| Low                                                     | 941  | 47.6 |
| <b>Contextual characteristics</b>                       |      |      |
| Social deprivation                                      |      |      |
| High                                                    | 552  | 27.2 |
| Low                                                     | 1475 | 72.8 |
| Material deprivation                                    |      |      |
| High                                                    | 850  | 41.9 |
| Low                                                     | 1177 | 58.1 |
| Density of psychiatrist                                 |      |      |
| High                                                    | 1569 | 77.4 |
| Low                                                     | 458  | 22.6 |
| Density of psychologist                                 |      |      |
| High                                                    | 1554 | 76.7 |
| Low                                                     | 473  | 23.3 |
| Density of GP                                           |      |      |
| High                                                    | 1525 | 75.2 |
| Low                                                     | 502  | 24.8 |

### 3.2 MDD, GAD and alcohol abuse and related work factors

#### Bivariate analysis

In bivariate analyses, sex was significantly associated with the two outcomes with higher disorders within women for GAD and MDD, for alcohol abuse where men were more affected. Family status, the number of workers in the company, past psychiatric problems, consultation for psychiatric, somatic or chronic diseases and job insecurity were also significantly associated with the two outcomes. Occupational grade, education level and past unemployment were significantly associated ( $p < 0.01$ ) with only alcohol abuse with higher rate for blue collars, patients who experienced unemployment in the past and individuals with an education level lower than a high school degree. Age and household income were only associated with MDD/GAD.

Regarding GP characteristics, GPs gender and opportunity to work with mental health specialist was associated with the two outcomes. Size of practice population was associated only with MDD/GAD.

Most of the contextual variables studied were not associated with our study outcomes, except for material deprivation, density of psychiatrists and psychologists which were significantly associated with MDD/GAD. To the contrary, work characteristics were almost all significantly associated with the two outcomes except insecurity and autonomy which were not associated with alcohol abuse (Table 2).

**Table 2:** Association between common mental disorders (major depressive disorders (MDD), generalised anxiety disorders (GAD) and Alcohol abuse) and covariates, Héraclès study, France, 2014 (Chi-square test)

|                                 | MDD/GAD (n=648) |                 | Alcohol (n=196) |                 |
|---------------------------------|-----------------|-----------------|-----------------|-----------------|
|                                 | N (%)           | p               | N (%)           | p               |
| <b>Work Characteristics</b>     |                 |                 |                 |                 |
| Work intensity                  |                 | <b>&lt;0.01</b> |                 | <b>0.01</b>     |
| High                            | 232 (52.8)      |                 | 58 (13.3)       |                 |
| Low                             | 416 (26.2)      |                 | 138 (8.7)       |                 |
| Emotional demands               |                 | <b>&lt;0.01</b> |                 | <b>&lt;0.01</b> |
| High                            | 262 (54.9)      |                 | 73 (15.3)       |                 |
| Low                             | 386 (24.9)      |                 | 123 (7.9)       |                 |
| Autonomy                        |                 | <b>&lt;0.01</b> |                 | 0.48            |
| High                            | 158 (26.4)      |                 | 53 (8.9)        |                 |
| Low                             | 490 (34.3)      |                 | 143 (10.0)      |                 |
| Conflict of values              |                 | <b>&lt;0.01</b> |                 | <b>&lt;0.01</b> |
| High                            | 335 (48.8)      |                 | 90 (13.1)       |                 |
| Low                             | 313 (23.3)      |                 | 106 (7.9)       |                 |
| Social relationships at work    |                 | <b>&lt;0.01</b> |                 | <b>0.03</b>     |
| High                            | 103 (15.0)      |                 | 52 (7.6)        |                 |
| Low                             | 545 (40.7)      |                 | 144 (10.8)      |                 |
| Insecurity                      |                 | <b>&lt;0.01</b> |                 | 0.14            |
| High                            | 242 (42.8)      |                 | 64 (11.3)       |                 |
| Low                             | 406 (27.8)      |                 | 132 (9.0)       |                 |
| <b>Covariates</b>               |                 |                 |                 |                 |
| <b>Patient Characteristics</b>  |                 |                 |                 |                 |
| Age group                       |                 | <b>0.03</b>     |                 | 0.24            |
| [18-35]                         | 172 (28.8)      |                 | 48 (8.0)        |                 |
| [36-50]                         | 306 (35.1)      |                 | 87 (10.0)       |                 |
| [51-65]                         | 169 (30.6)      |                 | 60 (10.9)       |                 |
| Sex                             |                 | <b>&lt;0.01</b> |                 | <b>&lt;0.01</b> |
| H                               | 266 (28.3)      |                 | 140 (14.9)      |                 |
| F                               | 382 (35.2)      |                 | 56 (5.2)        |                 |
| Occupational grade              |                 | 0.32            |                 | <b>&lt;0.01</b> |
| Blue collar                     | 79 (28.9)       |                 | 53 (19.4)       |                 |
| Pink collar                     | 386 (32.6)      |                 | 86 (7.3)        |                 |
| White collar                    | 152 (29.6)      |                 | 50 (9.7)        |                 |
| Educational level               |                 | 0.13            |                 | <b>&lt;0.01</b> |
| < High school degree            | 266 (34.1)      |                 | 98 (12.6)       |                 |
| ≥ High school degree            | 381 (30.8)      |                 | 97 (7.8)        |                 |
| Family status                   |                 | <b>0.01</b>     |                 | <b>&lt;0.01</b> |
| Lives alone                     | 471 (30.5)      |                 | 63 (13.1)       |                 |
| Lives with a partner or parents | 177 (36.8)      |                 | 133 (8.6)       |                 |
| Household income (in €)         |                 | <b>0.03</b>     |                 | 0.30            |
| [0-3.000]                       | 184 (37.5)      |                 | 53 (10.8)       |                 |
| 3.000 +                         | 353 (31.7)      |                 | 100 (9.0)       |                 |
| Number of worker in the company |                 | <b>0.03</b>     |                 | <b>&lt;0.01</b> |
| 1 to 5                          | 108 (29.9)      |                 | 51 (14.1)       |                 |
| 6 to 25                         | 183 (37.3)      |                 | 53 (10.8)       |                 |
| 26 to 250                       | 138 (32.9)      |                 | 43 (10.2)       |                 |
| 250 +                           | 203 (29.5)      |                 | 45 (6.6)        |                 |
| Past psychiatric problems       |                 | <b>&lt;0.01</b> |                 | <b>&lt;0.01</b> |
| Yes                             | 108 (57.1)      |                 | 30 (15.9)       |                 |
| No                              | 516 (29.8)      |                 | 150 (8.6)       |                 |
| Past somatic problems           |                 | 0.82            |                 | 0.84            |
| Yes                             | 185 (33.1)      |                 | 53 (9.5)        |                 |
| No                              | 445 (32.4)      |                 | 136 (9.9)       |                 |

p: Chi-square test



Table 2: (continued)

|                                                         | MDD and GAD (n=648) |                 | Alcohol (n=196) |                 |
|---------------------------------------------------------|---------------------|-----------------|-----------------|-----------------|
|                                                         | N (%)               | p               | N (%)           | p               |
| Purpose of consultation with GP                         |                     |                 |                 |                 |
| Somatic                                                 |                     | <b>&lt;0.01</b> |                 | <b>0.04</b>     |
| Yes                                                     | 335 (25.2)          |                 | 115 (8.6)       |                 |
| No                                                      | 313 (45.0)          |                 | 81 (11.6)       |                 |
| Psychological                                           |                     | <b>&lt;0.01</b> |                 | <b>&lt;0.01</b> |
| Yes                                                     | 312 (73.4)          |                 | 61 (14.4)       |                 |
| No                                                      | 336 (21.0)          |                 | 135 (8.4)       |                 |
| Chronic disease management                              |                     | <b>&lt;0.01</b> |                 | <b>&lt;0.01</b> |
| Yes                                                     | 75 (24.0)           |                 | 46 (14.7)       |                 |
| No                                                      | 573 (33.4)          |                 | 150 (8.8)       |                 |
| Past unemployment                                       |                     | 0.57            |                 | <b>&lt;0.01</b> |
| Yes                                                     | 202 (33.0)          |                 | 80 (13.1)       |                 |
| No                                                      | 446 (31.5)          |                 | 116 (8.2)       |                 |
| Job instability                                         |                     | <b>&lt;0.01</b> |                 | <b>&lt;0.01</b> |
| Yes                                                     | 229 (43.9)          |                 | 70 (13.4)       |                 |
| No                                                      | 400 (27.5)          |                 | 118 (11.1)      |                 |
| <b>GPs Characteristics</b>                              |                     |                 |                 |                 |
| GP's gender                                             |                     | <b>&lt;0.01</b> |                 | <b>&lt;0.01</b> |
| Male                                                    | 375 (27.5)          |                 | 152 (11.1)      |                 |
| Female                                                  | 273 (41.2)          |                 | 44 (6.6)        |                 |
| GP's age                                                |                     | 0.13            |                 | 0.14            |
| [18-39]                                                 | 72 (37.1)           |                 | 18 (9.3)        |                 |
| [40-49]                                                 | 190 (30.4)          |                 | 49 (7.8)        |                 |
| [50-59]                                                 | 254 (30.5)          |                 | 95 (11.4)       |                 |
| 60 +                                                    | 132 (35.2)          |                 | 34 (9.1)        |                 |
| Size of practice population                             |                     | <b>&lt;0.01</b> |                 | 0.06            |
| 0-500                                                   | 79 (37.4)           |                 | 18 (8.5)        |                 |
| 5000 - 1000                                             | 295 (29.7)          |                 | 82 (8.3)        |                 |
| 1000- 1500                                              | 136 (31.4)          |                 | 47 (10.9)       |                 |
| 1500+                                                   | 104 (41.1)          |                 | 34 (13.4)       |                 |
| Easiness with Mental health problems                    |                     | 0.21            |                 | 0.48            |
| High                                                    | 500 (31.3)          |                 | 155 (9.7)       |                 |
| Low                                                     | 118 (34.9)          |                 | 28 (8.3)        |                 |
| High opportunity to work with mental health specialists |                     | <b>&lt;0.01</b> |                 | <b>0.05</b>     |
| High                                                    | 345 (36.7)          |                 | 103 (9.9)       |                 |
| Low                                                     | 286 (27.6)          |                 | 86 (9.1)        |                 |
| <b>Contextual characteristics</b>                       |                     |                 |                 |                 |
| Social deprivation                                      |                     | 0.32            |                 | 0.87            |
| High                                                    | 167 (30.2)          |                 | 52 (9.4)        |                 |
| Low                                                     | 481 (32.6)          |                 | 144 (9.8)       |                 |
| Material deprivation                                    |                     | <b>&lt;0.01</b> |                 | 0.74            |
| High                                                    | 306 (36.0)          |                 | 85 (10.0)       |                 |
| Low                                                     | 342 (29.1)          |                 | 111 (9.4)       |                 |
| Density of psychiatrist                                 |                     | <b>0.02</b>     |                 | 0.97            |
| High                                                    | 522 (33.3)          |                 | 45 (9.8)        |                 |
| Low                                                     | 126 (27.5)          |                 | 151 (9.6)       |                 |
| Density of psychologist                                 |                     | <b>0.05</b>     |                 | 0.10            |
| High                                                    | 515 (33.1)          |                 | 36 (7.6)        |                 |
| Low                                                     | 133 (28.1)          |                 | 160 (10.3)      |                 |
| Density of GP                                           |                     | 0.06            |                 | 0.88            |
| High                                                    | 505 (33.1)          |                 | 50 (10.0)       |                 |
| Low                                                     | 143 (28.4)          |                 | 146 (9.6)       |                 |

p: Chi-square test

## Multivariable analysis

All occupational factors were associated with our two study outcomes in unadjusted analysis. In adjusted analyses, patients reporting high levels of work intensity (RR=1.16 [1.06 - 1.27];  $p<0.01$ ) and emotional demands (RR=1.24 [1.13 - 1.35];  $p<0.01$ ) had a higher risk of MDD/GAD whereas patient with high social relations at work had lower risk to have MDD/GAD (RR=0.78 [0.70 - 0.87];  $p<0.01$ ).

Regarding alcohol abuse, social relations at work were associated with higher risk (OR=1.31 [1.04 - 1.65];  $p=0.02$ ) and higher autonomy was protective (OR=0.79 [0.64 - 0.98];  $p=0.04$ ) (Table 3).

1  
2  
3  
4  
5  
6  
7  
8  
9  
10  
11  
12  
13  
14  
15  
16  
17  
18  
19  
20  
21  
22  
23  
24  
25  
26  
27  
28  
29  
30  
31  
32  
33  
34  
35  
36  
37  
38  
39  
40  
41  
42  
43  
44  
45  
46  
47

**Table 3:** major depressive disorders (MDD), generalized anxiety disorders (GAD) and alcohol abuse work-related factors, Héraclès study, France, 2014. Multilevel regression models

|                                     | MDD/GAD (n=1782) |                      |                 |                 |                      |                 | Alcohol (n=1776) |                      |                 |                 |                      |             |
|-------------------------------------|------------------|----------------------|-----------------|-----------------|----------------------|-----------------|------------------|----------------------|-----------------|-----------------|----------------------|-------------|
|                                     | Unadjusted       |                      |                 | Adjusted        |                      |                 | Unadjusted       |                      |                 | Adjusted        |                      |             |
|                                     | RR               | CI 95%               | P               | RR <sup>1</sup> | CI 95%               | P               | OR               | CI 95%               | P               | OR <sup>2</sup> | CI 95%               | P           |
| <b>Work intensity</b>               | <b>1.46</b>      | <b>[1.35 - 1.57]</b> | <b>&lt;0.01</b> | <b>1.16</b>     | <b>[1.06 - 1.27]</b> | <b>&lt;0.01</b> | <b>1.35</b>      | <b>[1.17 - 1.57]</b> | <b>&lt;0.01</b> | 1.20            | [0.98 - 1.46]        | 0.08        |
| <b>Emotional demands</b>            | <b>1.53</b>      | <b>[1.43 - 1.64]</b> | <b>&lt;0.01</b> | <b>1.24</b>     | <b>[1.13 - 1.35]</b> | <b>&lt;0.01</b> | <b>1.46</b>      | <b>[1.27 - 1.68]</b> | <b>&lt;0.01</b> | 1.21            | [0.98 - 1.48]        | 0.06        |
| <b>Autonomy</b>                     | <b>0.68</b>      | <b>[0.63 - 0.73]</b> | <b>&lt;0.01</b> | 0.94            | [0.85 - 1.04]        | 0.26            | <b>0.70</b>      | <b>[0.60 - 0.80]</b> | <b>&lt;0.01</b> | <b>0.79</b>     | <b>[0.64 - 0.98]</b> | <b>0.04</b> |
| <b>Conflict of values</b>           | <b>1.45</b>      | <b>[1.35 - 1.56]</b> | <b>&lt;0.01</b> | 1.06            | [0.96 - 1.17]        | 0.26            | <b>1.35</b>      | <b>[1.17 - 1.55]</b> | <b>&lt;0.01</b> | 1.21            | [0.97 - 1.50]        | 0.09        |
| <b>Social relationships at work</b> | <b>0.61</b>      | <b>[0.56 - 0.66]</b> | <b>&lt;0.01</b> | <b>0.78</b>     | <b>[0.70 - 0.87]</b> | <b>&lt;0.01</b> | <b>0.81</b>      | <b>[0.70 - 0.95]</b> | <b>0.01</b>     | <b>1.31</b>     | <b>[1.04 - 1.65]</b> | <b>0.02</b> |
| <b>Insecurity</b>                   | <b>1.13</b>      | <b>[1.05 - 1.22]</b> | <b>&lt;0.01</b> | 1.03            | [0.95 - 1.11]        | 0.49            | <b>1.14</b>      | <b>[1.00 - 1.30]</b> | <b>0.05</b>     | 0.94            | [0.80 - 1.12]        | 0.50        |

RR : relative risk

OR: odd ratio

<sup>1</sup> Adjusted on : each occupational factors, age, sex, occupational grade, past psychiatric problems, alcohol abuse, material deprivation and GP's gender

<sup>2</sup> Adjusted on : each occupational factors, age, sex, occupational grade, family status, number of person in the company, past psychiatric problems, job instability, education level, past unemployment, GAD and MDD

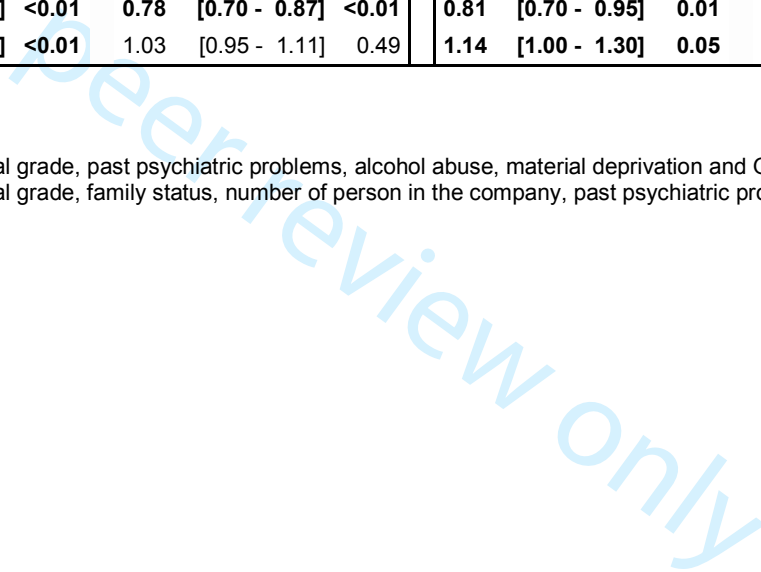

## 4 DISCUSSION

### 4.1 Main results

In our study conducted among a large sample of persons consulting a GP, we found that several work characteristics are associated with mental health. Unfavourable social relations at work are associated with a higher risk of MDD/GAD, but a lower risk of alcohol abuse. High work intensity and high emotional demands at work are associated with a higher risk of MDD/GAD. Finally, low autonomy at work is significantly associated with a higher risk of alcohol abuse.

### 4.2 Comparison with literature

We confirm, for the first time in primary care, the association between common mental disorders and work social support. This is consistent with data from a cross sectional study conducted in Japan (using the K10 questionnaire to assess depression): higher risk of depressive symptoms for workers with low social support at work (OR=3.8)<sup>39</sup>. It is also coherent with data from a meta-analysis of 17 other studies investigating depressive disorders.<sup>40</sup> Low social support at work is also associated with anxiety disorders as already observed in the population based study of Wang: employees with high stress in social support from superior or co-workers had higher risk of having anxiety disorders for both gender.<sup>41</sup> However, the causal direction of this association cannot be determined due to the cross sectional design of our study. It is possible that low social support increases the risk of having depression or anxiety as it has been shown in different longitudinal studies.<sup>42</sup> Moreover, it is well known that social relations and support (outside or inside work) affect psychological health,<sup>43</sup> but it is also possible that individual with no depression or anxiety disorders have better social support.<sup>43</sup> Finally, the association between GAD/MDD and social support could also be related to negative views of social support when depressed or anxious.<sup>44</sup> For alcohol abuse an inverse association is observed: higher risk associated with high social relationship at work and this result is consistent with results of

1  
2 a cross sectional study conducted among Canadian workers.<sup>21</sup> It raises question about festive alcohol  
3 consumption with colleagues in or outside the company.<sup>45</sup>  
4

5  
6 Work intensity, or high psychological demand in terms of high working time and intensity was  
7 associated with depressive symptoms in the meta-analysis of Theorell (10 studies).<sup>40</sup> The meta-  
8 analysis of longitudinal studies of Netterstrom highlights the adverse effect of high psychological  
9 demand on the occurrence of depressive disorders.<sup>42</sup> However, this association could also ensue that  
10 persons with depressive disorders have distorted views of psychological demands.<sup>44</sup>  
11

12  
13 High emotional demands at work have already been observed for depressive disorders among  
14 women in a population-based nested case-control study of 14,166 psychiatric patients in Denmark  
15 (IRR=1.39)<sup>22</sup> or for GAD in the French prospective study SIP (using the same diagnostic tool MINI)  
16 (RR=1.66 among workers with high emotional demand<sup>18</sup>). The designs of those two studies argue for  
17 the negative effect of high emotional demand on depression and anxiety, but in our cross sectional  
18 study the causal attribution is not possible thus it is also possible that people with depression and/or  
19 anxiety have a different view towards those demands.<sup>44</sup>  
20

21  
22 Autonomy appears related to alcohol abuse, as reported in an English prospective study: low decision  
23 latitude, which is a part of the autonomy axis in our study, is associated to higher risk of alcohol  
24 dependence within women.<sup>46</sup>  
25

26  
27 We do not confirm the association found earlier between CMD and high job insecurity or conflict of  
28 value.<sup>17 18 20</sup>  
29

### 4.3 Strengths and limitations of the study

30  
31 Several limitations of our study should be acknowledged.  
32

33  
34 First, our study was conducted in the Nord - Pas-de-Calais region, i.e. one of the poorest in France  
35 with a total 4,000,000 inhabitants. This highly industrialized region during the first half of the 20<sup>th</sup>  
36 century, suffered since 1950 from industrial decline, mines, textile and steel industries gradually  
37 closing. Despite the growth of services and some specialized industries (car, rail and glass), levels of  
38 education, unemployment (15%), and poverty and health indicators (e.g. life expectancy) are  
39 unfavourable. The Nord - Pas-de-Calais region have a low density of GPs (11% less than in France)  
40  
41  
42  
43  
44  
45  
46  
47  
48  
49  
50  
51  
52  
53  
54  
55  
56  
57  
58  
59

1  
2  
3 and other medical specialities (24% less).<sup>47</sup> Moreover, the study was conducted after the 2008  
4 recession, which has been associated with an increase in the prevalence of common mental health  
5 disorders worldwide.<sup>48 49</sup> This could lead to a high level of psychiatric disorders. The prevalence of  
6 MDD, GAD and alcohol abuse within patient consulting a GP is respectively 19.1%, 25.8% and 9.7%.  
7  
8 This is consistent in the superior limits with studies in primary care ranging prevalence from 6% to  
9 25% for depression, 3% to 25% for anxiety and 2% to 11% for alcohol abuse.<sup>7 9 23-26</sup> Results should be  
10 replicated in others areas.

11  
12  
13  
14  
15  
16 Second, a possible weakness is the selective participation of GPs. GPs who have participated in the  
17 study could be especially interested in common mental disorders. This interest may be related to  
18 interest of GP itself, but it could also be related to the GPs patient rate of common mental disorders.  
19  
20 Therefore, it may cause a larger selection of patient with psychological disorders. However,  
21 participation rate were similar to previous studies<sup>24 50</sup> and GP were selected to be representative of  
22 the Nord - Pas-de-Calais GPs in term of geographical localisation and therefore limiting this possible  
23 bias. Participating GP had similar age, practice and years of practice than all GP in the region. Patient  
24 selection should also be considered. However, a random procedure to define patients included in the  
25 study limits this bias. Indeed, GPs were asked to include patient following an inclusion schedule that  
26 was provided at the start of the study. This allowed us to include patient in different time slots of the  
27 week. Moreover a non-respondent form had to be filled by the GPs but we suppose that the filling rate  
28 was low because only 41 GPs filled this form and declare that 495 patient were not included.  
29  
30 Characteristics of patients included and those not included did not differ in term of age and sex.

31  
32  
33  
34  
35  
36  
37  
38  
39  
40  
41  
42  
43  
44  
45  
46  
47  
48  
49  
50  
51  
52  
53  
54  
55  
56  
57  
58  
59  
60  
If we were able to take into account many co-variables (individuals, GPs and contextual), we missed  
for some important individual variables (as social support outside of work, life events...) we would like  
to control to study CMD and work-related factors.

Despite these limitations, the results of this study are of interest because they study occupational  
factors related to CMD (MDD/GAD and alcohol abuse) among working adults in primary care with a  
standardized diagnostic tool (MINI) in a large sample (n=2 027).<sup>29</sup> However we have to be cautious  
about these results and further studies in other areas have to be done in order to confirm our findings.

#### 4.4 Conclusion

Our study is one of the first studying simultaneously well-known factors related to the job strain and effort-reward imbalance models and new occupational factors described in recent literature and the first conducted among working individuals in primary care. Results point out the importance of social support at work and different occupational factors that are associated with MDD, GAD and alcohol abuse. These results could be a starting point to apprehend these factors with the patient and to communicate with occupational physician.

#### ACKNOWLEDGMENT

The authors thank all the participating GPs of the Nord – Pas-de-Calais region and their patients who participate to Héraclès study. We thanks the department of General practice of Lille's university and the regional union of health professional of GP's (URPS-ML) of the Nord – Pas-de-Calais region for their involvement in the GP recruitment phase. We also want to thank all the members' scientific committee of the Héraclès study who contribute to the brainstorming and the set-up of this survey

#### CONTRIBUTORS

Study concept and design: MR, NY, MM, AL, TB, LP. Data analysis and collection: MR, LFC, MM, LP. Drafting of the manuscript: MR. Critical revision of the manuscript: NY, MM, AL. All authors have approved the final manuscript.

#### COMPETING INTERESTS

All authors declare that they do not have any competing interests and declare independence from the funders.

#### FUNDING

This work was supported by the Nord – Pas-de-Calais regional health agency (ARS) and the Ile-de-France region – DIM Gestes (Mathieu Rivière's PhD thesis).

1  
2  
3  
4 **DATA SHARING STATEMENT**

5  
6 No additional data are available  
7  
8  
9  
10  
11  
12  
13  
14  
15  
16  
17  
18  
19  
20  
21  
22  
23  
24  
25  
26  
27  
28  
29  
30  
31  
32  
33  
34  
35  
36  
37  
38  
39  
40  
41  
42  
43  
44  
45  
46  
47  
48  
49  
50  
51  
52  
53  
54  
55  
56  
57  
58  
59  
60

For peer review only



## 5 REFERENCES

1. Wagenaar AF, Kompier MA, Houtman IL, et al. Employment contracts and health selection: unhealthy employees out and healthy employees in? *J Occup Environ Med* 2012;54(10):1192-200. doi: 10.1097/JOM.0b013e3182717633 [published Online First: 2012/09/22]
2. Hussey L, Turner S, Thorley K, et al. Work-related ill health in general practice, as reported to a UK-wide surveillance scheme. *Br J Gen Pract* 2008;58(554):637-40. doi: 10.3399/bjgp08X330753 [published Online First: 2008/09/20]
3. Whiteford HA, Degenhardt L, Rehm J, et al. Global burden of disease attributable to mental and substance use disorders: findings from the Global Burden of Disease Study 2010. *Lancet (London, England)* 2013;382(9904):1575-86. doi: 10.1016/s0140-6736(13)61611-6 [published Online First: 2013/09/03]
4. Harvey SB, Modini M, Joyce S, et al. Can work make you mentally ill? A systematic meta-review of work-related risk factors for common mental health problems. *Occup Environ Med* 2017;74(4):301-10. doi: 10.1136/oemed-2016-104015 [published Online First: 2017/01/22]
5. Reme SE, Grasdahl AL, Lovvik C, et al. Work-focused cognitive-behavioural therapy and individual job support to increase work participation in common mental disorders: a randomised controlled multicentre trial. *Occup Environ Med* 2015;72(10):745-52. doi: 10.1136/oemed-2014-102700 [published Online First: 2015/08/08]
6. Stewart WF, Ricci JA, Chee E, et al. Cost of lost productive work time among US workers with depression. *JAMA* 2003;289(23):3135-44. doi: 10.1001/jama.289.23.3135 [published Online First: 2003/06/19]
7. Milanovic SM, Erjavec K, Poljicanin T, et al. Prevalence of depression symptoms and associated socio-demographic factors in primary health care patients. *Psychiatr Danub* 2015;27(1):31-7. [published Online First: 2015/03/10]
8. Freeman A, Tyrovolas S, Koyanagi A, et al. The role of socio-economic status in depression: results from the COURAGE (aging survey in Europe). *BMC Public Health* 2016;16(1):1098. doi: 10.1186/s12889-016-3638-0 [published Online First: 2016/10/21]
9. Ibanez G, Son S, Chastang J, et al. Mental Health Disorders in General Practice in France: A Cross-Sectional Survey. *Transl Biomed* 2016;7:4. doi: 10.2167/2172-0479.100096
10. Lacerda-Pinheiro SF, Pinheiro Junior RF, Pereira de Lima MA, et al. Are there depression and anxiety genetic markers and mutations? A systematic review. *J Affect Disord* 2014;168:387-98. doi: 10.1016/j.jad.2014.07.016 [published Online First: 2014/08/12]
11. Abbas RA, Hammam RA, El-Gohary SS, et al. Screening for common mental disorders and substance abuse among temporary hired cleaners in Egyptian Governmental Hospitals, Zagazig City, Sharqia Governorate. *The international journal of occupational and environmental medicine* 2013;4(1):13-26. [published Online First: 2013/01/03]
12. Karasek R. Job demands, job decision latitude, and mental strain : implication for job redesign. *Adm Sci Q* 1979 24 285-309.
13. Siegrist J. Adverse health effects of high-effort/low-reward conditions. *J Occup Health Psychol* 1996;1(1):27-41. [published Online First: 1996/01/01]
14. Elovainio M, Kivimaki M, Vahtera J. Organizational justice: evidence of a new psychosocial predictor of health. *Am J Public Health* 2002;92(1):105-8. [published Online First: 2002/01/05]
15. Rugulies R, Aust B, Madsen IE. Effort-reward imbalance at work and risk of depressive disorders. A systematic review and meta-analysis of prospective cohort studies. *Scand J Work Environ Health* 2017;43(4):294-306. doi: 10.5271/sjweh.3632 [published Online First: 2017/03/18]
16. Stansfeld S, Candy B. Psychosocial work environment and mental health--a meta-analytic review. *Scand J Work Environ Health* 2006;32(6):443-62. [published Online First: 2006/12/19]

17. Murcia M, Chastang JF, Niedhammer I. Psychosocial work factors, major depressive and generalised anxiety disorders: results from the French national SIP study. *J Affect Disord* 2013;146(3):319-27. doi: 10.1016/j.jad.2012.09.014 [published Online First: 2012/10/13]
18. Niedhammer I, Malard L, Chastang JF. Occupational factors and subsequent major depressive and generalized anxiety disorders in the prospective French national SIP study. *BMC Public Health* 2015;15:200. doi: 10.1186/s12889-015-1559-y [published Online First: 2015/04/18]
19. Gollac M. Mesurer les facteurs psychosociaux de risque au travail pour les maîtriser. 2010 [Available from: [http://travail-emploi.gouv.fr/IMG/pdf/rapport\\_SRPST\\_definitif\\_rectifie\\_11\\_05\\_10.pdf](http://travail-emploi.gouv.fr/IMG/pdf/rapport_SRPST_definitif_rectifie_11_05_10.pdf)].
20. Schutte S, Chastang JF, Parent-Thirion A, et al. Psychosocial work exposures among European employees: explanations for occupational inequalities in mental health. *Journal of public health (Oxford, England)* 2015;37(3):373-88. doi: 10.1093/pubmed/fdv044 [published Online First: 2015/04/26]
21. Marchand A, Parent-Lamarche A, Blanc ME. Work and high-risk alcohol consumption in the Canadian workforce. *International journal of environmental research and public health* 2011;8(7):2692-705. doi: 10.3390/ijerph8072692 [published Online First: 2011/08/17]
22. Wieclaw J, Agerbo E, Mortensen PB, et al. Psychosocial working conditions and the risk of depression and anxiety disorders in the Danish workforce. *BMC Public Health* 2008;8:280. doi: 10.1186/1471-2458-8-280 [published Online First: 2008/08/09]
23. Ansseau M, Dierick M, Buntinx F, et al. High prevalence of mental disorders in primary care. *J Affect Disord* 2004;78(1):49-55. doi: S0165032702002197 [pii] [published Online First: 2003/12/16]
24. Toft T, Fink P, Oernboel E, et al. Mental disorders in primary care: prevalence and co-morbidity among disorders. results from the functional illness in primary care (FIP) study. *Psychol Med* 2005;35(8):1175-84. [published Online First: 2005/08/25]
25. Alkhadhari S, Alsabbri AO, Mohammad IH, et al. Prevalence of psychiatric morbidity in the primary health clinic attendees in Kuwait. *J Affect Disord* 2016;195:15-20. doi: 10.1016/j.jad.2016.01.037 [published Online First: 2016/02/08]
26. Norton J, de Roquefeuil G, David M, et al. [Prevalence of psychiatric disorders in French general practice using the patient health questionnaire: comparison with GP case-recognition and psychotropic medication prescription]. *Encephale* 2009;35(6):560-9. doi: 10.1016/j.encep.2008.06.018 S0013-7006(08)00267-4 [pii] [published Online First: 2009/12/17]
27. Riviere M, Plancke L, Leroyer A, et al. Prevalence of work-related common psychiatric disorders in primary care: The French Heracles study. *Psychiatry Res* 2017 doi: 10.1016/j.psychres.2017.09.008 [published Online First: 2017/09/19]
28. Flahault A, Blanchon T, Dorleans Y, et al. Virtual surveillance of communicable diseases: a 20-year experience in France. *Statistical methods in medical research* 2006;15(5):413-21. [published Online First: 2006/11/09]
29. Sheehan DV, Lecrubier Y, Sheehan KH, et al. The Mini-International Neuropsychiatric Interview (M.I.N.I.): the development and validation of a structured diagnostic psychiatric interview for DSM-IV and ICD-10. *J Clin Psychiatry* 1998;59 Suppl 20:22-33;quiz 34-57. [published Online First: 1999/01/09]
30. Moorman R. Relationship between organizational justice and organizational citizenship behaviors: do fairness perception influence employee citizenship? *J Appl Psychol* 1991;76:845-55.
31. Kristensen TS, Hannerz H, Hogh A, et al. The Copenhagen Psychosocial Questionnaire--a tool for the assessment and improvement of the psychosocial work environment. *Scand J Work Environ Health* 2005;31(6):438-49. [published Online First: 2006/01/24]

32. Dallner M, Elo A-L, Gamberale F, et al. Validation of the general Nordic questionnaire (QPSNordic) for psychological and social factors at work (No. Nord 2000:12). In: Ministers NCo, ed. Copenhagen, 2000.
33. Hansez I. The Working Conditions and Control Questionnaire (WOCCQ): Towards a structural model of psychological stress. *European Review of Applied Psychology* 2008;58(253 – 262)
34. INSEE. Nomenclature des Professions et Catégories Socioprofessionnelles - PCS 2003 [Available from: <https://www.insee.fr/fr/information/2400059>].
35. Min KB, Park SG, Hwang SH, et al. Precarious employment and the risk of suicidal ideation and suicide attempts. *Preventive medicine* 2015;71:72-6. doi: 10.1016/j.ypmed.2014.12.017 [published Online First: 2014/12/24]
36. Fleury MJ, Bamvita JM, Farand L, et al. Variables associated with general practitioners taking on patients with common mental disorders. *Mental health in family medicine* 2008;5(3):149-60. [published Online First: 2008/09/01]
37. Pampalon R, Hamel D, Gamache P, et al. Validation of a deprivation index for public health: a complex exercise illustrated by the Quebec index. *Chronic diseases and injuries in Canada* 2014;34(1):12-22. [published Online First: 2014/03/13]
38. Moreno-Betancur M, Latouche A, Menvielle G, et al. Relative index of inequality and slope index of inequality: a structured regression framework for estimation. *Epidemiology (Cambridge, Mass)* 2015;26(4):518-27. doi: 10.1097/ede.0000000000000311 [published Online First: 2015/05/23]
39. Honda A, Date Y, Abe Y, et al. Work-related Stress, Caregiver Role, and Depressive Symptoms among Japanese Workers. *Saf Health Work* 2014;5(1):7-12. doi: 10.1016/j.shaw.2013.11.002 [published Online First: 2014/06/17]
40. Theorell T, Hammarström A, Aronsson G, et al. A systematic review including meta-analysis of work environment and depressive symptoms. *BMC Public Health* 2015;15 doi: 10.1186/s12889-015-1954-4
41. Wang JL, Lesage A, Schmitz N, et al. The relationship between work stress and mental disorders in men and women: findings from a population-based study. *J Epidemiol Community Health* 2008;62(1):42-7. doi: 10.1136/jech.2006.050591 [published Online First: 2007/12/15]
42. Netterstrom B, Conrad N, Bech P, et al. The relation between work-related psychosocial factors and the development of depression. *Epidemiologic reviews* 2008;30:118-32. doi: 10.1093/epirev/mxn004 [published Online First: 2008/07/01]
43. Melchior M, Berkman LF, Niedhammer I, et al. Social relations and self-reported health: a prospective analysis of the French Gazel cohort. *Social science & medicine (1982)* 2003;56(8):1817-30. [published Online First: 2003/03/18]
44. Beck AT, Brown GK, Steer RA, et al. Psychometric properties of the Beck Self-Esteem Scales. *Behaviour research and therapy* 2001;39(1):115-24. [published Online First: 2000/12/28]
45. Nordaune K, Skarpaas LS, Sagvaag H, et al. Who initiates and organises situations for work-related alcohol use? The WIRUS culture study. *Scandinavian journal of public health* 2017:1403494817704109. doi: 10.1177/1403494817704109 [published Online First: 2017/07/02]
46. Head J, Stansfeld SA, Siegrist J. The psychosocial work environment and alcohol dependence: a prospective study. *Occup Environ Med* 2004;61(3):219-24. [published Online First: 2004/02/27]
47. Plancke L, Bavdek R. Les disparités régionales en santé mentale et en psychiatrie. La situation du Nord Pas-de-Calais en France métropolitaine, Lille, F2RSM. 2013. <http://www.santementale5962.com/ressources-et-outils/les-editions-de-la-f2rsm/article/disparites-regionales-en-sante>.
48. Katikireddi SV, Niedzwiedz CL, Popham F. Trends in population mental health before and after the 2008 recession: a repeat cross-sectional analysis of the 1991-2010 Health Surveys of

- 1  
2  
3 England. *BMJ Open* 2012;2(5) doi: 10.1136/bmjopen-2012-001790 [published Online First:  
4 2012/10/19]
- 5 49. Lee S, Guo WJ, Tsang A, et al. Evidence for the 2008 economic crisis exacerbating depression in  
6 Hong Kong. *J Affect Disord* 2010;126(1-2):125-33. doi: 10.1016/j.jad.2010.03.007 [published  
7 Online First: 2010/04/13]
- 8 50. Goldenberg MG, Skeldon SC, Nayan M, et al. Prostate-specific antigen testing for prostate cancer  
9 screening: A national survey of Canadian primary care physicians' opinions and practices.  
10 *Canadian Urological Association journal = Journal de l'Association des urologues du Canada*  
11 2017 doi: 10.5489/cuaj.4486 [published Online First: 2017/11/07]  
12

13 **Legends:**

14 Figure 1: Flow chart of participation in the Héraclès study, France, 2014  
15  
16  
17  
18  
19  
20  
21  
22  
23  
24  
25  
26  
27  
28  
29  
30  
31  
32  
33  
34  
35  
36  
37  
38  
39  
40  
41  
42  
43  
44  
45  
46  
47  
48  
49  
50  
51  
52  
53  
54  
55  
56  
57  
58  
59  
60

1  
2  
3  
4  
5  
6  
7  
8  
9  
10  
11  
12  
13  
14  
15  
16  
17  
18  
19  
20  
21  
22  
23  
24  
25  
26  
27  
28  
29  
30  
31  
32  
33  
34  
35  
36  
37  
38  
39  
40  
41  
42  
43  
44  
45  
46  
47  
48  
49  
50  
51  
52  
53  
54  
55  
56  
57  
58  
59  
60

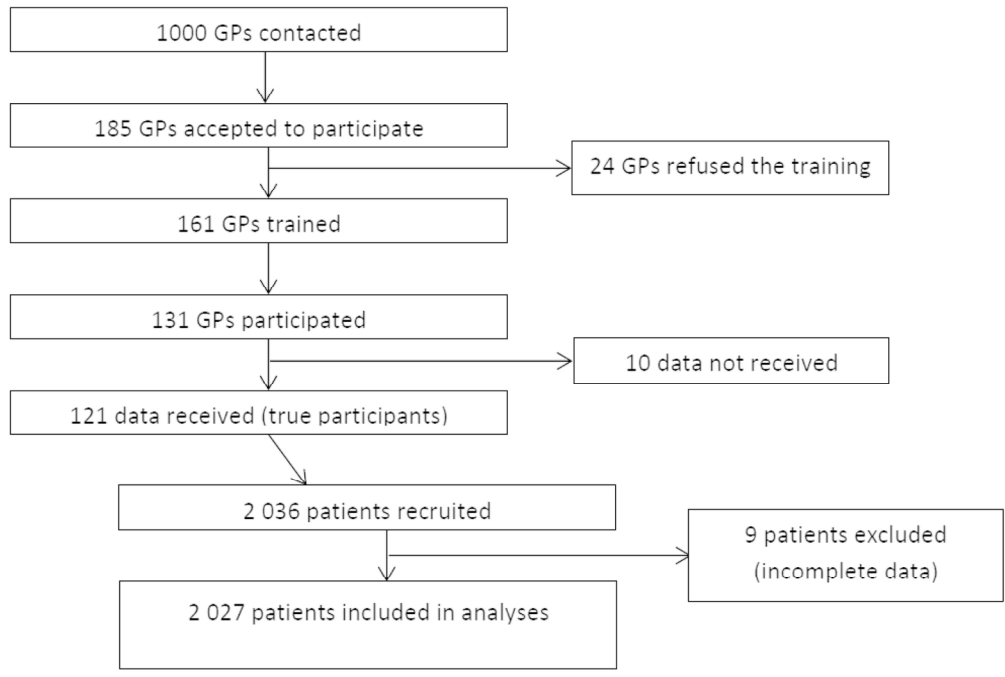

Flow chart of participation in the Heracles study, France, 2014

154x104mm (300 x 300 DPI)

**Appendix 1:** Work's factor questionnaire**1) Work intensity**

- I receive contradictory orders or indication (“Yes”/“No”)
- I am asked excessive amounts of work (“Always”/“Often”/“Sometimes”/“Never”)
- I have too much to think about at work (“Always”/“Often”/“Sometimes”/“Never”)
- I have difficulties in balancing work and family life (“Always”/“Often”/“Sometimes”/“Never”)
- I have the time needed to do my work (“Always”/“Often”/“Sometimes”/“Never”)

**2) Emotional demands**

- I work in contact with customers/beneficiaries (“Yes”/“No”)
- I am in contact with people in distress (“Yes”/“No”)
- I have conflicts with customers/beneficiaries (“Always”/“Often”/“Sometimes”/“Never”)
- I have to hide my emotions and pretend to be in a good mood (“Always”/“Often”/“Sometimes”/“Never”)
- I sometimes experience fear during my work (“Always”/“Often”/“Sometimes”/“Never”)
- During my work, I am exposed to physical, verbal, psychological aggressions (“Always”/“Often”/“Sometimes”/“Never”)

**3) Autonomy**

- I have very little freedom to decide how I do my job (“Always”/“Often”/“Sometimes”/“Never”)
- I can fully employ my skills (“Always”/“Often”/“Sometimes”/“Never”)

**4) Conflict of values**

- I have the possibility to make a work of quality (“Always”/“Often”/“Sometimes”/“Never”)
- In my work, I have to do disapproved things (“Always”/“Often”/“Sometimes”/“Never”)

**5) Social relationships at work**

- My work is fully recognized (“Always”/“Often”/“Sometimes”/“Never”)
- I have support from colleagues (“Always”/“Often”/“Sometimes”/“Never”)
- I have support from superior (“Always”/“Often”/“Sometimes”/“Never”)

**6) Insecurity of work**

- I feel able to do my current job until retirement (“Yes”/“No”)
- I work with fear of losing my job (“Always”/“Often”/“Sometimes”/“Never”)

STROBE Statement—Checklist of items that should be included in reports of *cross-sectional studies*

|                              | Item No | Recommendation                                                                                                                                                                                                                                                                                                                                                                                                |
|------------------------------|---------|---------------------------------------------------------------------------------------------------------------------------------------------------------------------------------------------------------------------------------------------------------------------------------------------------------------------------------------------------------------------------------------------------------------|
| <b>Title and abstract</b>    | 1       | (a) Indicate the study's design with a commonly used term in the title or the abstract <b>page 1 and 2</b><br>(b) Provide in the abstract an informative and balanced summary of what was done and what was found - <b>page 1 and 2</b>                                                                                                                                                                       |
| <b>Introduction</b>          |         |                                                                                                                                                                                                                                                                                                                                                                                                               |
| Background/rationale         | 2       | Explain the scientific background and rationale for the investigation being reported <b>page 4 and 5</b>                                                                                                                                                                                                                                                                                                      |
| Objectives                   | 3       | State specific objectives, including any prespecified hypotheses - <b>page 4 and 5</b>                                                                                                                                                                                                                                                                                                                        |
| <b>Methods</b>               |         |                                                                                                                                                                                                                                                                                                                                                                                                               |
| Study design                 | 4       | Present key elements of study design early in the paper - <b>page 6</b>                                                                                                                                                                                                                                                                                                                                       |
| Setting                      | 5       | Describe the setting, locations, and relevant dates, including periods of recruitment, exposure, follow-up, and data collection - <b>page 6</b>                                                                                                                                                                                                                                                               |
| Participants                 | 6       | (a) Give the eligibility criteria, and the sources and methods of selection of participants - <b>page 6</b>                                                                                                                                                                                                                                                                                                   |
| Variables                    | 7       | Clearly define all outcomes, exposures, predictors, potential confounders, and effect modifiers. Give diagnostic criteria, if applicable – <b>page 6 to 8</b>                                                                                                                                                                                                                                                 |
| Data sources/<br>measurement | 8*      | For each variable of interest, give sources of data and details of methods of assessment (measurement). Describe comparability of assessment methods if there is more than one group - <b>page 6 to 8</b>                                                                                                                                                                                                     |
| Bias                         | 9       | Describe any efforts to address potential sources of bias – <b>page 6</b>                                                                                                                                                                                                                                                                                                                                     |
| Study size                   | 10      | Explain how the study size was arrived at – <b>page 6</b>                                                                                                                                                                                                                                                                                                                                                     |
| Quantitative variables       | 11      | Explain how quantitative variables were handled in the analyses. If applicable, describe which groupings were chosen and why – <b>page 8 and 9</b>                                                                                                                                                                                                                                                            |
| Statistical methods          | 12      | (a) Describe all statistical methods, including those used to control for confounding <b>page 8 and 9</b><br>(b) Describe any methods used to examine subgroups and interactions<br>(c) Explain how missing data were addressed<br>(d) If applicable, describe analytical methods taking account of sampling strategy<br>(e) Describe any sensitivity analyses                                                |
| <b>Results</b>               |         |                                                                                                                                                                                                                                                                                                                                                                                                               |
| Participants                 | 13*     | (a) Report numbers of individuals at each stage of study—eg numbers potentially eligible, examined for eligibility, confirmed eligible, included in the study, completing follow-up, and analysed – <b>page 10 and figure 1</b><br>(b) Give reasons for non-participation at each stage – <b>figure 1</b><br>(c) Consider use of a flow diagram – <b>figure 1</b>                                             |
| Descriptive data             | 14*     | (a) Give characteristics of study participants (eg demographic, clinical, social) and information on exposures and potential confounders – <b>page 10 to 12</b><br>(b) Indicate number of participants with missing data for each variable of interest                                                                                                                                                        |
| Outcome data                 | 15*     | Report numbers of outcome events or summary measures – <b>page 13</b>                                                                                                                                                                                                                                                                                                                                         |
| Main results                 | 16      | (a) Give unadjusted estimates and, if applicable, confounder-adjusted estimates and their precision (eg, 95% confidence interval). Make clear which confounders were adjusted for and why they were included – <b>page 13 to 17</b><br>(b) Report category boundaries when continuous variables were categorized<br>(c) If relevant, consider translating estimates of relative risk into absolute risk for a |

1  
2  
3  
4  
5  
6  
7  
8  
9  
10  
11  
12  
13  
14  
15  
16  
17  
18  
19  
20  
21  
22  
23  
24  
25  
26  
27  
28  
29  
30  
31  
32  
33  
34  
35  
36  
37  
38  
39  
40  
41  
42  
43  
44  
45  
46  
47  
48  
49  
50  
51  
52  
53  
54  
55  
56  
57  
58  
59  
60

|                          |    |                                                                                                                                                                                                    |
|--------------------------|----|----------------------------------------------------------------------------------------------------------------------------------------------------------------------------------------------------|
|                          |    | meaningful time period                                                                                                                                                                             |
| Other analyses           | 17 | Report other analyses done—eg analyses of subgroups and interactions, and sensitivity analyses                                                                                                     |
| <b>Discussion</b>        |    |                                                                                                                                                                                                    |
| Key results              | 18 | Summarise key results with reference to study objectives – <b>page 18</b>                                                                                                                          |
| Limitations              | 19 | Discuss limitations of the study, taking into account sources of potential bias or imprecision. Discuss both direction and magnitude of any potential bias – <b>page 19 and 20</b>                 |
| Interpretation           | 20 | Give a cautious overall interpretation of results considering objectives, limitations, multiplicity of analyses, results from similar studies, and other relevant evidence – <b>page 18 and 19</b> |
| Generalisability         | 21 | Discuss the generalisability (external validity) of the study results – <b>page 20 and 21</b>                                                                                                      |
| <b>Other information</b> |    |                                                                                                                                                                                                    |
| Funding                  | 22 | Give the source of funding and the role of the funders for the present study and, if applicable, for the original study on which the present article is based – <b>page 21</b>                     |

\*Give information separately for exposed and unexposed groups.

**Note:** An Explanation and Elaboration article discusses each checklist item and gives methodological background and published examples of transparent reporting. The STROBE checklist is best used in conjunction with this article (freely available on the Web sites of PLoS Medicine at <http://www.plosmedicine.org/>, Annals of Internal Medicine at <http://www.annals.org/>, and Epidemiology at <http://www.epidem.com/>). Information on the STROBE Initiative is available at [www.strobe-statement.org](http://www.strobe-statement.org).



# BMJ Open

## Which work-related characteristics are most strongly associated with common mental disorders?: A cross-sectional study

|                                 |                                                                                                                                                                                                                                                                                                                                                                                                                                                                                                                                                                                                                                                                                                                                                                                                                                                                                                                                                                  |
|---------------------------------|------------------------------------------------------------------------------------------------------------------------------------------------------------------------------------------------------------------------------------------------------------------------------------------------------------------------------------------------------------------------------------------------------------------------------------------------------------------------------------------------------------------------------------------------------------------------------------------------------------------------------------------------------------------------------------------------------------------------------------------------------------------------------------------------------------------------------------------------------------------------------------------------------------------------------------------------------------------|
| Journal:                        | <i>BMJ Open</i>                                                                                                                                                                                                                                                                                                                                                                                                                                                                                                                                                                                                                                                                                                                                                                                                                                                                                                                                                  |
| Manuscript ID                   | bmjopen-2017-020770.R1                                                                                                                                                                                                                                                                                                                                                                                                                                                                                                                                                                                                                                                                                                                                                                                                                                                                                                                                           |
| Article Type:                   | Research                                                                                                                                                                                                                                                                                                                                                                                                                                                                                                                                                                                                                                                                                                                                                                                                                                                                                                                                                         |
| Date Submitted by the Author:   | 12-Mar-2018                                                                                                                                                                                                                                                                                                                                                                                                                                                                                                                                                                                                                                                                                                                                                                                                                                                                                                                                                      |
| Complete List of Authors:       | Riviere, Mathieu; Sorbonne Universités, UPMC Univ Paris 06, INSERM, Institut Pierre Louis d'épidémiologie et de Santé Publique (IPLESP UMRS 1136); Centre Hospitalier Régional, Department of Infectious Diseases Leroyer, Ariane; Centre Hospitalier Regional Universitaire de Lille, Occupational Health<br>Ferreira Carreira, Lionel; Centre Hospitalier Regional Universitaire de Lille, Occupational Health<br>Blanchon, Thierry; Sorbonne Universités, UPMC Univ Paris 06, INSERM, Institut Pierre Louis d'épidémiologie et de Santé Publique (IPLESP UMRS 1136)<br>Plancke, Laurent; Fédération régionale de recherche en psychiatrie et santé mentale Hauts-de-France<br>Melchior, Maria; Sorbonne Universités, UPMC Univ Paris 06, INSERM, Institut Pierre Louis d'épidémiologie et de Santé Publique (IPLESP UMRS 1136)<br>Younès, Nadia; EA 40-47 University of Versailles Saint-Quentin; Academic Unit of psychiatry for adults, Versailles Hospital |
| <b>Primary Subject Heading</b>: | Occupational and environmental medicine                                                                                                                                                                                                                                                                                                                                                                                                                                                                                                                                                                                                                                                                                                                                                                                                                                                                                                                          |
| Secondary Subject Heading:      | Mental health, General practice / Family practice                                                                                                                                                                                                                                                                                                                                                                                                                                                                                                                                                                                                                                                                                                                                                                                                                                                                                                                |
| Keywords:                       | PRIMARY CARE, PSYCHIATRY, OCCUPATIONAL & INDUSTRIAL MEDICINE                                                                                                                                                                                                                                                                                                                                                                                                                                                                                                                                                                                                                                                                                                                                                                                                                                                                                                     |
|                                 |                                                                                                                                                                                                                                                                                                                                                                                                                                                                                                                                                                                                                                                                                                                                                                                                                                                                                                                                                                  |

SCHOLARONE™  
Manuscripts

1  
2  
3 1  
4 2 Which work-related characteristics are most strongly associated with common mental  
5 3 disorders? : A cross-sectional study  
6 4

7 5 Mathieu Rivière<sup>a,b</sup>, Ariane Leroyer<sup>c</sup>, Lionel Ferreira Carreira<sup>c</sup>, Thierry Blanchon<sup>a</sup>, Laurent Plancke<sup>d</sup>,  
8  
9 6 Maria Melchior<sup>a</sup>, Nadia Younès<sup>e,f</sup>

10  
11 7  
12 8 a Sorbonne Universités, UPMC Univ Paris 06, INSERM, Institut Pierre Louis d'épidémiologie et de Santé Publique  
13 9 (IPLESP UMRS 1136), F75013, Paris, France

14  
15 10 b Department of Infectious Diseases, Centre Hospitalier Régional, Orléans, France

16  
17 11 c Université Lille Nord de France, Lille, France

18  
19 12 d Fédération régionale de recherche en santé mentale (F2RSM) Nord - Pas-de-Calais, Lille, France

20  
21 13 e EA 40-47 University of Versailles Saint-Quentin, Versailles, France

22  
23 14 f Academic Unit of psychiatry for adults, Versailles Hospital, Versailles, France

24  
25 15  
26 16  
27 17  
28 18 Word count: 4,497

29  
30 21 Corresponding author:

31  
32 22 Mathieu Rivière

33  
34 23 Réseau Sentinelles, Centre hospitalier régional d'Orléans 1 rue porte Madeleine, 45000 Orléans, France

35  
36 24 Phone : 00 33 (2) 38 74 40 05. Fax : 00 33 (2) 76 34 16 38

37  
38 25 E-mail : mathieu.riviere@iplesp.upmc.fr  
39  
40  
41  
42  
43  
44  
45  
46  
47  
48  
49  
50  
51  
52  
53  
54  
55  
56  
57  
58  
59  
60

## 1 **ABSTRACT**

2 **OBJECTIVES:** Studies exploring work-related risk factors of common mental disorders (CMD) such  
3 as major depressive disorder (MDD), generalized anxiety disorder (GAD) or alcohol abuse have  
4 generally focused on a limited set of work characteristics. We study, for the first time in a primary  
5 care setting, simultaneously multiple work-related risk factors of CMD.

6 **METHOD:** We use data from a representative study of working individuals recruited among 2,027  
7 patients of 121 representative general practitioners (GP) in the Nord - Pas-de-Calais region in  
8 France (April-August 2014). CMD were assessed using the MINI (Mini International  
9 Neuropsychiatric Interview). Six emergent worked-related factors were explored (work intensity,  
10 emotional demands, autonomy, social relationships at work, conflict of values, and insecurity of  
11 work). Several covariates were considered (patient's, GP's and contextual characteristics). To study  
12 the association between workplace risk factors and CMD (MDD; GAD; alcohol abuse) multilevel  
13 Poisson regression models adjusted for covariates were performed.

14  
15 **RESULTS:** Among study participants, 389 (19.1%) had current MDD, 522 (25.8%) current GAD and  
16 196 (9.7%) current alcohol abuse. In multivariable analyses adjusted for covariates, MDD/GAD was  
17 significantly associated with work intensity (RR=1.16 [1.06 - 1.27]) (absolute risk = 52.8%),  
18 emotional demands (RR=1.24 [1.13 - 1.35]) (absolute risk = 54.9%) and social relations at work  
19 (RR=0.78 [0.70 - 0.87]) (absolute risk = 15.0%); alcohol abuse was associated with social relations  
20 at work (RR=1.25 [1.01 - 1.53]) (absolute risk = 7.6%) and autonomy (OR=0.82 [0.67 - 0.99])  
21 (absolute risk = 8.9%).

22  
23 **CONCLUSIONS:** Several workplace factors are associated with CMD among working individuals  
24 seen by a GP. These findings confirm the role of organizational characteristics of work as a correlate  
25 of psychological difficulties above and beyond other sources of risk.

26  
27 **Key terms:** mental health; primary care; workplace factors

## STRENGTHS AND LIMITATIONS OF THE STUDY

- Cross-sectional study design
- Study of occupational factors related to common mental disorders among working adults in primary care with a standardized diagnostic tool in a large sample
- The study was conducted in the Nord – Pas-de-Calais region in France, one of the poorest in France thus, this could lead to a high level of psychological disorders
- Selective participation of general practitioners (GP) may have led to an overrepresentation of patients with psychological disorders. However GPs were selected to be representative of the region's GPs and the use of a random procedure to define patients included in the study limits this bias

## 1 1 INTRODUCTION

2 Individuals who are part of the labour force are generally in better health than the unemployed,<sup>1</sup>  
3 however work can also have negative effects on somatic and psychosocial health.<sup>2</sup> A study with  
4 trained general practitioners (GP) in occupational medicine found that mental health issues are the  
5 most frequent disorders attributed to work, after musculoskeletal disorders.<sup>3</sup> They are responsible  
6 for most of sickness absence and long-term work incapacity.<sup>4</sup> In France, data from the national  
7 health insurance shows that 20% of sickness absence are caused by mental disorders with an  
8 increased proportion for long term sickness absence.<sup>5</sup> Mental disorders encountered among  
9 employed are mainly “Common Mental Disorders” (CMD), as defined based on epidemiological data  
10 by a systematic review and meta-analysis of this literature, as a combination of disorders across the  
11 mood, anxiety and substance use disorder (alcohol) spectrum.<sup>6</sup> The association between work and  
12 CMD is bidirectional: work has been shown as a risk factor of poor mental health<sup>7</sup> but the presence  
13 of CMD can also influence job performance and well-being.<sup>8,9</sup> Several others risk factors of CMD are  
14 already known, even if associations vary for the different disorders. Sociodemographic risk factors  
15 include being divorced or widowed, having a low educational level, older age, sex.<sup>10-12</sup> Genetic  
16 factors<sup>13</sup> and personal or family history of somatic chronic disease or psychiatric disease are also  
17 well described in literature.<sup>14</sup> Environmental factors (e.g. social and material deprivation, etc.) were  
18 described and show that low socio-economic status was associated with higher rates of  
19 depression.<sup>10,11</sup>

20 Psychosocial factors related to the work environment are of particular interest because they may be  
21 more easily prevented than those which results from life events, which are often unavoidable. Three  
22 main theoretical models have been proposed to explain relations between work characteristics and  
23 mental health. First, Karasek<sup>15</sup> argued that keys to health are psychological demands, decision  
24 latitude and social support. Second, Siegrist<sup>16</sup> proposed that the subjectively ascertained effort-  
25 reward balance is what matters most. These two models are the gold standard to study  
26 psychosocial risk at work and have a good predictive value but they lack some dimensions to well  
27 describe the psychosocial environment at work at the individual level and more precisely dimension

1 about procedural justice in the company. A third model addressing the role of organizational justice  
2 developed by Elovainio included interpersonal comparison, that is to say comparison of the  
3 response of the company in the same situation for different employees.<sup>17</sup> Several studies evaluate  
4 the impact of work on mental health using these theoretical models.<sup>7 18 19</sup> Overall, the risk of mental  
5 disorders is higher when there is high job demands, low job control, high effort-reward imbalance or  
6 low organizational justice. As work organization is evolving, other psychosocial factors described as  
7 “emergent factors” (e.g. insecurity at work, conflict of values, etc.) appear in the recent studies<sup>20-23</sup>.  
8 Workers experiencing high job insecurity or role conflict also seem to have a higher levels of CMD.<sup>20</sup>  
9 <sup>21</sup>An important systematic meta-review identified three overlapping categories of work-placed risk  
10 factors that may contribute to the development of common mental health problems (considering  
11 depression and/or anxiety), combining emergent and classical factors and identified with reasonable  
12 levels of evidence: imbalanced job design (high job demands, low job control, low social support in  
13 work-place, effort-reward imbalance), occupational uncertainty (low job control, low procedural  
14 justice, job insecurity, temporary employment status, low social support in work-place) and lack of  
15 value and respect in workplace (effort-reward imbalance, procedural justice, temporary employment  
16 status, low social support in work-place).<sup>7</sup> This review did not describe precisely CMD (MDD was  
17 most explored, GAD less explored<sup>7 24 25</sup> and alcohol abuse should also be explored among CMD)  
18 and as reported by the authors, it was based too frequently upon self-reported questionnaires and  
19 not validated diagnostic interviews. Moreover, those factors changes over time with modification of  
20 the labour market (increased globalization, competition, new forms of work organization, etc). A  
21 French study assessed changes in psychosocial work factors between 2006 and 2011 and showed  
22 that some psychosocial work factors deteriorated (decision latitude, social support, reward, role  
23 conflict and work life imbalance) between 2006 and 2011. It also found that these changes varied  
24 according to age, occupation, sector activity and type of contract.<sup>26</sup> The objective of this study is to  
25 assess the association between GAD, MDD and alcohol abuse in a primary care setting, using  
26 validated diagnostic interviews and combining most psychosocial work-related risk factors in a  
27 population of individuals consulting their general practitioner (GP). Combining emergent and  
28 classical factors is important in order to identify which are most strongly related to workers' mental

1 health, this was outlined in the meta-review by Harvey *et al.*<sup>7</sup> We considered that this population is  
2 important to explore as people with CMD are frequently treated by GP either initially or throughout  
3 treatment.<sup>27 28</sup> In primary care, the prevalence levels of CMD are high, ranging from 3%<sup>21</sup> to 25% for  
4 anxiety disorders,<sup>12 27-30</sup> 6%<sup>12</sup> to 25% for depression<sup>10 27-30</sup> and 2%<sup>28</sup> to 11% for alcohol abuse.<sup>27 28</sup>  
5 Two studies conducted in the United Kingdom show that a third of patients seeing a GP for work-  
6 related reasons had a mental health issue.<sup>3 31</sup> It constitutes a major clinical issue: GPs often have  
7 difficulties managing work-related mental health problems, as they often lack negotiation strategies  
8 regarding sick leave, communication skills and cooperation with occupational physicians.<sup>32</sup> GPs  
9 encounter every type of workers and not only big industrial settings with occupational services. A  
10 better understanding of work related factors of mental health is important in order to help GPs to  
11 consider specific actions.

## 2 METHODS

### 2.1 Design and Study population

Heracles is a cross-sectional study conducted between April and August 2014 among working individuals consulting a primary care physician in the Nord - Pas-de-Calais region in the North of France. The number of subjects needed and the set-up of the study have previously been described<sup>33</sup>. Briefly, with an estimated prevalence of 20% and to have a precision of 10%, we aimed to include 2,000 patients via their GP. Participating GPs who gave an oral consent to participate, were asked to include randomly a maximum of 24 patients who met the following criteria: being actively employed and aged 18 to 65 years, regardless of the reason of their medical appointment. GPs were selected to be representative of the distribution of GPs in 15 areas of the Nord-Pas-de-Calais region that we studied. GPs had to include the two first patients who met the inclusion criteria in each previously defined time slot. Approximately ¼ of the GPs of the region were contacted to participate, they were selected in a way that was proportional to the distribution of GPs in 15 areas of Nord – Pas-de-Calais region that were studied. GP's had to include the two first patient who met the inclusion criteria in each time slot defined previously with GPs according to their working schedule. Before the appointment the GP gave written information to their patients to inform them about the study and asked them to sign an informed consent.

This study was conducted by the Sentinelles network,<sup>34</sup> part of the INSERM-Paris Sorbonne University research unit UMR-S 1136. This research group has a standing authorization from the French independent administrative authority protecting privacy and personal data (CNIL), n°471 393 to conduct research among GPs and their patients.



## 2.2 Data collection

Participating GPs received a 15 minute phone training on the use of the questionnaire before the beginning of the study. After their regular appointment, GPs interviewed their patients for the purposes of the study. Study questionnaires included information on:

### 2.2.1 Measurement of common mental disorders

CMDs were measured using a standardised diagnostic interview: the Mini International Neuropsychiatric Interview (MINI) that was used as a screening tool. The MINI is a structured clinical interview that enables the diagnosis of mental disorders based on the Diagnosis and Statistical Manual of Mental Disorders, fourth edition (DSM-IV).<sup>35</sup>

In this study, three different diagnoses were ascertained: Major Depressive Disorder (MDD) (during the preceding 2 weeks), Generalised Anxiety Disorder (GAD) (during the preceding 6 months), and alcohol abuse (during the preceding 12 months).

Depending on the mental disorders studied, the sensibility of the MINI varied between 83 to 94% (MDD: 94%; GAD: 88%; Alcohol: 83%), the specificity between 72 to 97% (MDD: 79%; GAD: 72%; Alcohol: 97%) and the Kappa concordance coefficient between 0.36 to 0.82 (MDD: 0.73; GAD: 0.36; Alcohol: 0.82). The inter-rater and test-retest reliability measured by Kappa coefficient were good, respectively 0.88 to 1 and 0.76 to 0.93.<sup>36</sup>

### 2.2.2 Work characteristics

Work characteristics were self-reported by the patient to their GP. We used a national French questionnaire proposed by experts in the field based on the international scientific literature and after auditioning Robert Karasek and Johannes Siegrist.<sup>22</sup> It combines questions measuring demand - control - social support developed in Karasek's model<sup>15</sup> (two questions about decision latitude, four questions about psychological demands and two questions about social support) ; questions measuring effort/reward balance in Siegrist's model<sup>16</sup> (three questions about reward and one question about overinvestment), and questions about organizational justice from Moorman's questionnaire,<sup>37</sup> questions from the Copenhagen Psychosocial Questionnaire<sup>38</sup> and from the

1  
2 1 General Nordic Questionnaire for Psychological and Social Factors at Work<sup>39</sup> or from Working  
3  
4 2 Conditions and Control Questionnaire (WOCCQ)<sup>40</sup>. Overall, twenty items explore six different areas  
5  
6 3 (Appendix 1): 1) five for the first area related to work intensity and duration (contradictory orders,  
7  
8 4 excessive amounts of work, too much to think about at work, difficulties in balancing work and family  
9  
10 5 life, time needed for work), 2) six items for the second area concerning emotional demands  
11  
12 6 (contacts with customers/beneficiaries, contact with people in distress, conflicts with  
13  
14 7 customers/beneficiaries, the need to hide emotions, fear, exposure to aggressions), 3) two items for  
15  
16 8 the third area concerning autonomy (limited possibility of decision, full and well employment of  
17  
18 9 skills), 4) three items for the fourth area relating quality of social work relations (full-recognition of  
19  
20 10 the work, support from colleagues, support from superior), 5) two items for the fifth area concerning  
21  
22 11 ethical conflicts (possibility to make a work of quality, doing disapproved things) 6) and two items in  
23  
24 12 the last area about insecurity of work (ability to work until retirement, fear of losing job). For four of  
25  
26 13 these items (public contact at work, contact with people in distress, contradictory order, ability to  
27  
28 14 work until retirement) the response was either “yes” or “no” and for the other factors the responses  
29  
30 15 were “always”/“often”/“sometimes”/“never” numbered from 1 to 4. Reliability of the questionnaire was  
31  
32 16 assessed by computing an alpha Cronbach coefficient. This coefficient varied between 0.34 to 0.68.  
33  
34 17 The reliability was lower for ethical conflicts ( $\alpha=0.34$ ), emotional demands ( $\alpha=0.44$ ) and higher for  
35  
36 18 work intensity ( $\alpha=0.48$ ), insecurity of work ( $\alpha=0.48$ ), autonomy ( $\alpha=0.65$ ) and social work relations  
37  
38 19 ( $\alpha=0.68$ ).

### 20 2.2.3 Covariates

#### 21 *Patient's characteristics*

22 We considered already know risk-factors of CMD.<sup>10</sup>

- 23 • Past somatic or psychiatric problems;
- 24 • Sociodemographic (age, gender, family status, family income, level of education);
- 25 • Occupational grade<sup>41</sup>, they were classified in three groups: blue (farmer/manual worker),  
26 pink (technician/associate professional/clerk/service worker) and white collar workers  
27 (manager/professional);<sup>42</sup>

- 1 • Company size;
- 2 • Job instability: a recombined variable of type of contract

### 3 *Primary care characteristics*<sup>43</sup>

- 4 • Reason for medical appointment (somatic, psychological, chronic disease management);
- 5 • Sociodemographic (GP's age, GP's gender);
- 6 • Practice characteristics (size of practice; comfort with psychological distress issues;
- 7 opportunity to collaborate with mental health specialists).

### 8 *Contextual characteristics (by proximity area)*

9 Contextual characteristics have been shown to be associated with CMD in primary care<sup>10 11</sup>

- 10 • Psychiatrists, psychologist and GPs density;
- 11 • Social deprivation (loneliness, single parenthood, widowhood/divorce) and material
- 12 deprivation (unemployment, income, level of not graduated),<sup>44 45</sup>
- 13 • Geographical area: 15 proximity areas defined by the regional health agency of the Nord
- 14 – Pas-de-Calais region.

## 15 **2.3 Statistical Analyses**

16 Some of the covariates were recoded to use fewer categories. For family status, participants living  
17 alone or living with parents were grouped into one category. For family income, participants were  
18 grouped in two categories: [0-3,000 euros (which corresponds to approximately two times the  
19 minimum wage in France) and  $\geq 3,000$  euros. For educational level, we created two categories:  
20 less than a high school degree (no degree, degree below high school) or a degree higher or equal to  
21 a high school degree. For age, our continuous variable was studied in three categories based on the  
22 distribution 18-35; 36-50; 51-65.

23 Sociodemographic characteristics of all patients were described and associations between these  
24 covariates with GAD, MDD and alcohol abuse were studied using the Chi-square test. Covariates  
25 associated with the outcomes with  $p < 0.2$  were included in the multivariate analysis.

1  
2 1 A value was attributed to each answer of the twenty questions regarding occupational factors. Those  
3  
4 2 factors were regrouped according to the 6 dimensions defined in the Gollac report and in order to be  
5  
6 3 able to compare each dimension, a Z-score was calculated for each dimension.<sup>22</sup> A correlation  
7  
8 4 matrix of the different work characteristics was computed and presented in a supplementary file  
9  
10 5 (appendix 2). In bivariate analysis the dimensions were classified as high if the score was above the  
11  
12 6 third quartile and as low if not, in multivariable models they were used as continuous variables. To  
13  
14 7 study the association between occupational factors and alcohol we performed multilevel logistic  
15  
16 8 regression models with patient as level one and geographical area as level two. GAD and MDD  
17  
18 9 were merged into the same variable because of intercorrelation. To study the association between  
19  
20 10 occupational factors and GAD/MDD and alcohol we used multilevel Poisson regression models  
21  
22 11 using a robust error variance procedure (sandwich estimation)<sup>46</sup> with patient as level one and  
23  
24 12 geographical area as level two. Given the high prevalence of these problems, Poisson regression  
25  
26 13 was preferred to logistic regression to avoid overestimating the risk ratios.<sup>47</sup> GAD/MDD or alcohol  
27  
28 14 abuse were the dependent variables and the six occupational factors were the exposition variables.  
29  
30 15 The models were adjusted for each exposition variable and for other covariates that were associated  
31  
32 16 with GAD/MDD or alcohol abuse ( $p < 0.05$ ) in a multivariable Poisson regression model excluding  
33  
34 17 occupational factors. Age, sex and occupational grade were included directly in the adjustment  
35  
36 18 variable. Absolute risk within exposed population was computed for each occupational factors.  
37  
38 19 All analyses were performed using GNU R software version 3.1.1. (lme4 package).<sup>48 49</sup>  
39  
40 20

## 3 RESULTS

### 3.1 Participation and description of the population

Of the 1,000 GPs contacted by mail, 185 accepted to participate (response rate= 18.5%) and 121 completed the study (Figure 1). Participating GPs were more likely to be male (sex ratio=1.82), and to be 50 years or older; they were disseminated throughout the Nord - Pas-de-Calais region (Table 1). Participating GPs were representative of the other GPs in the Nord - Pas-de-Calais region in term of geographical localisation, age, type and years of practice.

Participating GPs recruited 2,027 patients among which 389 (19.1%) had MDD, 522 (25.8%) GAD and 196 (9.7%) alcohol abuse. Patients were mostly female (53.6%) aged 42.3 years (sd 10.6) on average, mainly living with a partner (76.2%). Patients were pink collar workers in 60.1% of cases (clerk/service workers and technician/associate professional), 61.3% had graduated from high school and 30.2% had been unemployed in the past. Among participants, 21.0% came to see their GP for psychological reasons (Table 1). Characteristics of patient with MDD, GAD or alcohol abuse are presented in table 2.

The study response rate was 80%: 41 GPs filled a non-respondent form for 495 patients who refused to participate. Non-respondents did not differ from participants in term of age ( $p= 0.47$ ) and sex ( $p=0.23$ ). Comparing with the data of the National Health Insurance for working age patient consulting a GP, participants were older ( $p<0.01$ ) and were similar for sex distribution ( $p=0.08$ ).

1 **Table 1:** Description of the study population, Héraclès study, France, 2014

|                                 | N     | %    |
|---------------------------------|-------|------|
| <b>Work Characteristics</b>     |       |      |
| Work intensity                  |       |      |
| High                            | 437   | 21.6 |
| Low                             | 1,588 | 78.3 |
| Emotional demands               |       |      |
| High                            | 476   | 23.5 |
| Low                             | 1,549 | 76.4 |
| Autonomy                        |       |      |
| High                            | 598   | 29.5 |
| Low                             | 1,427 | 70.4 |
| Conflict of values              |       |      |
| High                            | 685   | 33.8 |
| Low                             | 1,340 | 66.1 |
| Social relationships at work    |       |      |
| High                            | 688   | 33.9 |
| Low                             | 1,337 | 66.0 |
| Insecurity                      |       |      |
| High                            | 565   | 27.9 |
| Low                             | 1,460 | 72.0 |
| <b>Covariates</b>               |       |      |
| <b>Patient Characteristics</b>  |       |      |
| Age group                       |       |      |
| [18-35]                         | 597   | 29.5 |
| [36-50]                         | 872   | 43.1 |
| [51-65]                         | 552   | 27.3 |
| Occupational grade              |       |      |
| Blue collar                     | 273   | 13.9 |
| Pink collar                     | 1,185 | 60.1 |
| White collar                    | 513   | 26.0 |
| Educational level               |       |      |
| < High school degree            | 780   | 38.7 |
| ≥ High school degree            | 1,238 | 61.3 |
| Family status                   |       |      |
| Lives alone                     | 481   | 23.8 |
| Lives with a partner or parents | 1,543 | 76.2 |
| Household income (in €)         |       |      |
| [0-3.000]                       | 491   | 30.6 |
| 3.000 +                         | 1,112 | 69.4 |
| Number of worker in the company |       |      |
| 1 to 10                         | 361   | 18.4 |
| 11 to 50                        | 490   | 25.0 |
| 51 to 250                       | 420   | 21.5 |
| 250 +                           | 687   | 35.1 |
| Past psychiatric problems       |       |      |
| Yes                             | 189   | 9.8  |
| No                              | 1,735 | 90.2 |
| Past somatic problems           |       |      |
| Yes                             | 559   | 28.9 |
| No                              | 1,373 | 71.1 |

2

3

1 **Table 1: (continued)**

|                                                         | N     | %    |
|---------------------------------------------------------|-------|------|
| Purpose of consultation with GP                         |       |      |
| Somatic                                                 |       |      |
| Yes                                                     | 1,331 | 65.7 |
| No                                                      | 696   | 34.3 |
| Psychological                                           |       |      |
| Yes                                                     | 425   | 21.0 |
| No                                                      | 1,602 | 79.0 |
| Chronic disease management                              |       |      |
| Yes                                                     | 313   | 15.4 |
| No                                                      | 1,714 | 84.6 |
| Past unemployment                                       |       |      |
| Yes                                                     | 613   | 30.2 |
| No                                                      | 1,414 | 69.8 |
| Job instability                                         |       |      |
| Yes                                                     | 522   | 33.0 |
| No                                                      | 1,061 | 67.0 |
| <b>GPs characteristics</b>                              |       |      |
| GP's gender                                             |       |      |
| Male                                                    | 1,364 | 67.3 |
| Female                                                  | 663   | 32.7 |
| GP's age                                                |       |      |
| [18-39]                                                 | 194   | 9.6  |
| [40-49]                                                 | 626   | 30.9 |
| [50-59]                                                 | 832   | 41.0 |
| 60 +                                                    | 375   | 18.5 |
| Size of practice population                             |       |      |
| 0-500                                                   | 211   | 11.2 |
| 5000 - 1000                                             | 993   | 52.5 |
| 1000- 1500                                              | 433   | 22.9 |
| 1500+                                                   | 253   | 13.4 |
| Comfort with Mental health problems                     |       |      |
| High                                                    | 1,600 | 82.6 |
| Low                                                     | 338   | 17.4 |
| High opportunity to work with mental health specialists |       |      |
| High                                                    | 1,036 | 52.4 |
| Low                                                     | 941   | 47.6 |
| <b>Contextual characteristics</b>                       |       |      |
| Social deprivation                                      |       |      |
| High                                                    | 552   | 27.2 |
| Low                                                     | 1,475 | 72.8 |
| Material deprivation                                    |       |      |
| High                                                    | 850   | 41.9 |
| Low                                                     | 1,177 | 58.1 |
| Density of psychiatrist                                 |       |      |
| High                                                    | 1,569 | 77.4 |
| Low                                                     | 458   | 22.6 |
| Density of psychologist                                 |       |      |
| High                                                    | 1,554 | 76.7 |
| Low                                                     | 473   | 23.3 |
| Density of GP                                           |       |      |
| High                                                    | 1,525 | 75.2 |
| Low                                                     | 502   | 24.8 |
| Geographical area                                       |       |      |
| Métropole Flandre intérieure                            | 1,035 | 51.1 |
| Hainault - Cambrésis                                    | 333   | 16.4 |
| Artois - Douaisis                                       | 337   | 16.6 |
| Littoral                                                | 322   | 15.9 |

2

1  
2  
3  
4  
5  
6  
7  
8  
9  
10  
11  
12  
13  
14  
15  
16  
17  
18  
19  
20  
21  
22  
23  
24  
25  
26  
27  
28  
29  
30  
31  
32  
33  
34  
35  
36  
37  
38  
39  
40  
41  
42  
43  
44  
45  
46  
47  
48  
49  
50  
51  
52  
53  
54  
55  
56  
57  
58  
59  
60

### 3.2 MDD, GAD and alcohol abuse and related work factors

Bivariate analysis (Table 2)

In bivariate analyses, sex was significantly associated with the two outcomes: high levels of GAD and MDD in women and high levels of alcohol abuse in men. Family status, the number of workers in the company, past psychiatric problems, consultation for psychiatric, somatic or chronic diseases and job insecurity were also significantly associated with the two outcomes. Occupational grade, education level and past unemployment were significantly associated ( $p < 0.01$ ) with only alcohol abuse with higher rates for blue collar workers, patients who experienced unemployment in the past and individuals with an education level lower than a high school degree. Age and household income were only associated with MDD/GAD.

Regarding GP characteristics, GP gender and opportunity to work with mental health specialist was associated with the two outcomes. Size of practice population was associated only with MDD/GAD.

Most of the contextual variables studied were not associated with our study outcomes, except for material deprivation and density of psychiatrists and psychologists which were significantly associated with MDD/GAD. To the contrary, work characteristics were almost all significantly associated with the two outcomes except insecurity and autonomy which were not associated with alcohol abuse (Table 2).



**Table 2:** Association between common mental disorders (major depressive disorders (MDD), generalised anxiety disorders (GAD) and Alcohol abuse) and covariates, Héraclys study, France, 2014 (Chi-square test)

|                                 | MDD and GAD (n=648) |                      | Alcohol (n=196) |                      |
|---------------------------------|---------------------|----------------------|-----------------|----------------------|
|                                 | N (%)               | p<br>( $\chi^2$ -df) | N (%)           | p<br>( $\chi^2$ -df) |
| <b>Work Characteristics</b>     |                     |                      |                 |                      |
| Work intensity                  |                     | <0.01                |                 | 0.01                 |
| High                            | 232 (52.8)          | (111.1 - 1)          | 58 (13.3)       | (7.5 - 1)            |
| Low                             | 416 (26.2)          |                      | 138 (8.7)       |                      |
| Emotional demands               |                     | <0.01                |                 | <0.01                |
| High                            | 262 (54.9)          | (149.8 - 1)          | 73 (15.3)       | (21.8 - 1)           |
| Low                             | 386 (24.9)          |                      | 123 (7.9)       |                      |
| Autonomy                        |                     | <0.01                |                 | 0.48                 |
| High                            | 158 (26.4)          | (11.6 - 1)           | 53 (8.9)        | (0.6 - 1)            |
| Low                             | 490 (34.3)          |                      | 143 (10.0)      |                      |
| Conflict of values              |                     | <0.01                |                 | <0.01                |
| High                            | 335 (48.8)          | (134.4 - 1)          | 90 (13.1)       | (13.5 - 1)           |
| Low                             | 313 (23.3)          |                      | 106 (7.9)       |                      |
| Social relationships at work    |                     | <0,01                |                 | 0,03                 |
| High                            | 103 (15.0)          | (137.2 - 1)          | 52 (7.6)        | (4.9 - 1)            |
| Low                             | 545 (40.7)          |                      | 144 (10.8)      |                      |
| Insecurity                      |                     | <0,01                |                 | 0,14                 |
| High                            | 242 (42.8)          | (41.8 - 1)           | 64 (11.3)       | (2.2 - 1)            |
| Low                             | 406 (27.8)          |                      | 132 (9.0)       |                      |
| <b>Covariates</b>               |                     |                      |                 |                      |
| <b>Patient Characteristics</b>  |                     |                      |                 |                      |
| Age group                       |                     | 0,03                 |                 | 0,24                 |
| [18-35]                         | 172 (28.8)          | (7.1 - 2)            | 48 (8.0)        | (2.8 - 2)            |
| [36-50]                         | 306 (35.1)          |                      | 87 (10.0)       |                      |
| [51-65]                         | 169 (30.6)          |                      | 60 (10.9)       |                      |
| Sex                             |                     | <0,01                |                 | <0,01                |
| H                               | 266 (28.3)          | (10.5 - 1)           | 140 (14.9)      | (53.7 - 1)           |
| F                               | 382 (35.2)          |                      | 56 (5.2)        |                      |
| Occupational grade              |                     | 0.32                 |                 | <0.01                |
| Blue collar                     | 79 (28.9)           | (2.3 - 2)            | 53 (19.4)       | (37.8 - 2)           |
| Pink collar                     | 386 (32.6)          |                      | 86 (7.3)        |                      |
| White collar                    | 152 (29.6)          |                      | 50 (9.7)        |                      |
| Educational level               |                     | 0.13                 |                 | <0.01                |
| < High school degree            | 266 (34.1)          | (2.3 - 1)            | 98 (12.6)       | (11.7 - 1)           |
| ≥ High school degree            | 381 (30.8)          |                      | 97 (7.8)        |                      |
| Family status                   |                     | 0.01                 |                 | <0.01                |
| Lives alone                     | 471 (30.5)          | (6.3 - 1)            | 63 (13.1)       | (7.9 - 1)            |
| Lives with a partner or parents | 177 (36.8)          |                      | 133 (8.6)       |                      |
| Household income (in €)         |                     | 0.03                 |                 | 0.30                 |
| [0-3.000]                       | 184 (37.5)          | (4.8 - 1)            | 53 (10.8)       | (1.1- 1)             |
| 3.000 +                         | 353 (31.7)          |                      | 100 (9.0)       |                      |
| Number of worker in the company |                     | 0.03                 |                 | <0.01                |
| 1 to 5                          | 108 (29.9)          | (9.1 - 3)            | 51 (14.1)       | (16.5 - 3)           |
| 6 to 25                         | 183 (37.3)          |                      | 53 (10.8)       |                      |
| 26 to 250                       | 138 (32.9)          |                      | 43 (10.2)       |                      |
| 250 +                           | 203 (29.5)          |                      | 45 (6.6)        |                      |
| Past psychiatric problems       |                     | <0.01                |                 | <0.01                |
| Yes                             | 108 (57.1)          | (57.1 - 1)           | 30 (15.9)       | (16.5 - 1)           |
| No                              | 516 (29.8)          |                      | 150 (8.6)       |                      |
| Past somatic problems           |                     | 0.82                 |                 | 0.84                 |
| Yes                             | 185 (33.1)          | (0.05 - 1)           | 53 (9.5)        | (0.04- 1)            |
| No                              | 445 (32.4)          |                      | 136 (9.9)       |                      |

p: Chi-square test  
df: degree of freedom

1 **Table 2: (continued)**

|                                                         | MDD and GAD (n=648) |                      | Alcohol (n=196) |                      |
|---------------------------------------------------------|---------------------|----------------------|-----------------|----------------------|
|                                                         | N (%)               | p<br>( $\chi^2$ -df) | N (%)           | p<br>( $\chi^2$ -df) |
| Purpose of consultation with GP                         |                     |                      |                 |                      |
| Somatic                                                 |                     | <0.01                |                 | 0.04                 |
| Yes                                                     | 335 (25.2)          | (81.5 - 1)           | 115 (8.6)       | (4.4 - 1)            |
| No                                                      | 313 (45.0)          |                      | 81 (11.6)       |                      |
| Psychological                                           |                     | <0.01                |                 | <0.01                |
| Yes                                                     | 312 (73.4)          | (422.3 - 1)          | 61 (14.4)       | (12.8 - 1)           |
| No                                                      | 336 (21.0)          |                      | 135 (8.4)       |                      |
| Chronic disease management                              |                     | <0.01                |                 | <0.01                |
| Yes                                                     | 75 (24)             | (10.5 - 1)           | 46 (14.7)       | (10.0 - 1)           |
| No                                                      | 573 (33.4)          |                      | 150 (8.8)       |                      |
| Past unemployment                                       |                     | 0.57                 |                 | <0.01                |
| Yes                                                     | 202 (33.0)          | (0.33 - 1)           | 80 (13.1)       | (11.0 - 1)           |
| No                                                      | 446 (31.5)          |                      | 116 (8.2)       |                      |
| Job insecurity                                          |                     | <0.01                |                 | <0.01                |
| Yes                                                     | 229 (43.9)          | (47.0 - 1)           | 70 (13.4)       | (12.0 - 1)           |
| No                                                      | 400 (27.5)          |                      | 118 (11.1)      |                      |
| <b>GPs Characteristics</b>                              |                     |                      |                 |                      |
| GP's gender                                             |                     | <0.01                |                 | <0.01                |
| Male                                                    | 375 (27.5)          | (37.8 - 1)           | 152 (11.1)      | (9.9 - 1)            |
| Female                                                  | 273 (41.2)          |                      | 44 (6.6)        |                      |
| GP's age                                                |                     | 0.13                 |                 | 0.14                 |
| [18-39]                                                 | 72 (37.1)           | (5.7 - 3)            | 18 (9.3)        | (5.5 - 3)            |
| [40-49]                                                 | 190 (30.4)          |                      | 49 (7.8)        |                      |
| [50-59]                                                 | 254 (30.5)          |                      | 95 (11.4)       |                      |
| 60 +                                                    | 132 (35.2)          |                      | 34 (9.1)        |                      |
| Size of practice population                             |                     | <0.01                |                 | 0.06                 |
| 0-500                                                   | 79 (37.4)           | (14.7 - 3)           | 18 (8.5)        | (7.4 - 3)            |
| 5000 - 1000                                             | 295 (29.7)          |                      | 82 (8.3)        |                      |
| 1000- 1500                                              | 136 (31.4)          |                      | 47 (10.9)       |                      |
| 1500+                                                   | 104 (41.1)          |                      | 34 (13.4)       |                      |
| Comfort with mental health problems                     |                     | 0.21                 |                 | 0.48                 |
| High                                                    | 500 (31.3)          | (1.6 - 1)            | 155 (9.7)       | (0.5 - 1)            |
| Low                                                     | 118 (34.9)          |                      | 28 (8.3)        |                      |
| High opportunity to work with mental health specialists |                     | <0.01                |                 | 0.05                 |
| High                                                    | 345 (36.7)          | (18.2 - 1)           | 103 (9.9)       | (3.7 - 1)            |
| Low                                                     | 286 (27.6)          |                      | 86 (9.1)        |                      |
| <b>Contextual characteristics</b>                       |                     |                      |                 |                      |
| Social deprivation                                      |                     | 0.32                 |                 | 0.87                 |
| High                                                    | 167 (30.2)          | (1.0 - 1)            | 52 (9.4)        | (0.03 - 1)           |
| Low                                                     | 481 (32.6)          |                      | 144 (9.8)       |                      |
| Material deprivation                                    |                     | <0.01                |                 | 0.74                 |
| High                                                    | 306 (36.0)          | (10.4 - 1)           | 85 (10)         | (0.1 - 1)            |
| Low                                                     | 342 (29.1)          |                      | 111 (9.4)       |                      |
| Density of psychiatrist                                 |                     | 0.02                 |                 | 0.97                 |
| High                                                    | 522 (33.3)          | (5.1 - 1)            | 45 (9.8)        | (0.01 - 1)           |
| Low                                                     | 126 (27.5)          |                      | 151 (9.6)       |                      |
| Density of psychologist                                 |                     | 0.05                 |                 | 0.10                 |
| High                                                    | 515 (33.1)          | (4.0 - 1)            | 36 (7.6)        | (2.7 - 1)            |
| Low                                                     | 133 (28.1)          |                      | 160 (10.3)      |                      |
| Density of GP                                           |                     | 0.06                 |                 | 0.88                 |
| High                                                    | 505 (33.1)          | (3.6 - 1)            | 50 (10.0)       | (0.02 - 1)           |
| Low                                                     | 143 (28.4)          |                      | 146 (9.6)       |                      |

2 *p*: Chi-square test  
3 *df*: degree of freedom  
4  
5

1  
2 1 Multivariable analysis (Table 3)

3  
4 2 All occupational factors were associated with our two study outcomes in unadjusted analysis. In  
5  
6 3 adjusted analyses, patients reporting high levels of work intensity (RR=1.16 [1.06 - 1.27]; p<0.01)  
7  
8 4 (absolute risk = 52.8%) and emotional demands (RR=1.24 [1.13 - 1.35]; p<0.01) (absolute risk =  
9  
10 5 54.9%) had a higher risk of MDD/GAD whereas patients with high social relations at work had lower  
11  
12 6 risk to have MDD/GAD (RR=0.78 [0.70 – 0.87]; p<0.01) (absolute risk = 15.0%).

13  
14 7 Regarding alcohol abuse, social relations at work were associated with higher risk (RR=1.25 [1.0 -  
15  
16 8 1.53]; p=0.03) (absolute risk = 7.6%) and higher autonomy was protective (RR=0.82 [0.67 – 0.99];  
17  
18 9 p=0.05) (absolute risk = 8.9%) (Table 3).

19  
20 10 Result for the adjustment variables are presented as a supplementary file (appendix 3).  
21  
22  
23  
24  
25  
26  
27  
28  
29  
30  
31  
32  
33  
34  
35  
36  
37  
38  
39  
40  
41  
42  
43  
44  
45  
46  
47  
48  
49  
50  
51  
52  
53  
54  
55  
56  
57  
58  
59  
60

1  
2  
3  
4  
5  
6  
7  
8  
9  
10  
11  
12  
13  
14  
15  
16  
17  
18  
19  
20  
21  
22  
23  
24  
25  
26  
27  
28  
29  
30  
31  
32  
33  
34  
35  
36  
37  
38  
39  
40  
41  
42  
43  
44  
45  
46  
47

**Table 3:** major depressive disorders (MDD), generalized anxiety disorders (GAD) and alcohol abuse work-related factors, Héraclès study, France, 2014. Multilevel Poisson regression models

|                                     | MDD/GAD (n=1782) |                      |                 |                 |                      |                 | Alcohol (n=1776) |                      |                 |                 |                      |             |
|-------------------------------------|------------------|----------------------|-----------------|-----------------|----------------------|-----------------|------------------|----------------------|-----------------|-----------------|----------------------|-------------|
|                                     | Unadjusted       |                      |                 | Adjusted        |                      |                 | Unadjusted       |                      |                 | Adjusted        |                      |             |
|                                     | RR <sup>1</sup>  | CI 95%               | P               | RR <sup>2</sup> | CI 95%               | P               | RR <sup>1</sup>  | CI 95%               | P               | RR <sup>3</sup> | CI 95%               | P           |
| <b>Work intensity</b>               | <b>1.46</b>      | <b>[1.35 - 1.57]</b> | <b>&lt;0.01</b> | <b>1.16</b>     | <b>[1.06 - 1.27]</b> | <b>&lt;0.01</b> | <b>1.31</b>      | <b>[1.14 - 1.50]</b> | <b>&lt;0.01</b> | 1.16            | [0.97 - 1.38]        | 0.10        |
| <b>Emotional demands</b>            | <b>1.53</b>      | <b>[1.43 - 1.64]</b> | <b>&lt;0.01</b> | <b>1.24</b>     | <b>[1.13 - 1.35]</b> | <b>&lt;0.01</b> | <b>1.40</b>      | <b>[1.23 - 1.59]</b> | <b>&lt;0.01</b> | 1.16            | [0.97 - 1.38]        | 0.10        |
| <b>Autonomy</b>                     | <b>0.68</b>      | <b>[0.63 - 0.73]</b> | <b>&lt;0.01</b> | 0.94            | [0.85 - 1.04]        | 0.26            | <b>0.72</b>      | <b>[0.63 - 0.83]</b> | <b>&lt;0.01</b> | <b>0.82</b>     | <b>[0.67 - 0.99]</b> | <b>0.05</b> |
| <b>Conflict of values</b>           | <b>1.45</b>      | <b>[1.35 - 1.56]</b> | <b>&lt;0.01</b> | 1.06            | [0.96 - 1.17]        | 0.26            | <b>1.30</b>      | <b>[1.14 - 1.49]</b> | <b>&lt;0.01</b> | 1.16            | [0.96 - 1.40]        | 0.13        |
| <b>Social relationships at work</b> | <b>0.61</b>      | <b>[0.56 - 0.66]</b> | <b>&lt;0.01</b> | <b>0.78</b>     | <b>[0.70 - 0.87]</b> | <b>&lt;0.01</b> | <b>0.83</b>      | <b>[0.72 - 0.96]</b> | <b>0.01</b>     | <b>1.25</b>     | <b>[1.01 - 1.53]</b> | <b>0.03</b> |
| <b>Insecurity</b>                   | <b>1.13</b>      | <b>[1.05 - 1.22]</b> | <b>&lt;0.01</b> | 1.03            | [0.95 - 1.11]        | 0.49            | <b>1.14</b>      | <b>[1.00 - 1.30]</b> | <b>0.05</b>     | 0.95            | [0.82 - 1.11]        | 0.52        |

RR : relative risk

<sup>1</sup> No adjustment: each occupational factor are studied one at the time

<sup>2</sup> Adjusted on : each occupational factors, age, sex, occupational grade, past psychiatric problems, alcohol abuse, material deprivation and GP's gender

<sup>3</sup> Adjusted on : each occupational factors, age, sex, occupational grade, family status, number of person in the company, past psychiatric problems, job instability, education level, past unemployment, GAD and MDD

For MDD/GAD model explained variance was 0.21 and 0.11 for Alcohol model

## 4 DISCUSSION

### 4.1 Main results

In our study conducted among a large sample of persons consulting a GP, we found that several work characteristics are associated with mental health. Unfavourable social relations at work are associated with a higher risk of MDD/GAD, but a lower risk of alcohol abuse. High work intensity and high emotional demands at work are associated with a higher risk of MDD/GAD. Finally, low autonomy at work is significantly associated with a higher risk of alcohol abuse.

### 4.2 Comparison with literature

We confirm, for the first time in primary care, the association between common mental disorders and work social support. This is consistent with data from a cross sectional study conducted in Japan (using the K10 questionnaire to assess depression): higher risk of depressive symptoms for workers with low social support at work (OR=3.8)<sup>50</sup>. It is also coherent with data from a meta-analysis of 17 other studies investigating depressive disorders.<sup>51</sup> Low social support at work is also associated with anxiety disorders as already observed in the population based study by Wang *et al*: employees with poor social support from superior or co-workers had higher risk of having anxiety disorders for both gender.<sup>52</sup> However, the causal direction of this association cannot be determined due to the cross sectional design of our study. It is possible that low social support increases the risk of having depression or anxiety as it has been shown in different longitudinal studies.<sup>53</sup> Moreover, it is well known that social relations and support (outside or inside work) affect psychological health,<sup>54</sup> but it is also possible that individual with no depression or anxiety disorders have better social support.<sup>54</sup> Finally, the association between GAD/MDD and social support could also be related to negative views of social support when depressed or anxious.<sup>55</sup> For alcohol abuse an inverse association is observed: higher risk associated with high social relationship at work and this result is consistent with results of a cross sectional study conducted among Canadian workers.<sup>24</sup> It raises question about festive alcohol

1  
2  
3 1 consumption with colleagues in or outside the company.<sup>56</sup> We perform a subgroup analysis by  
4  
5 2 occupational group to explore this result and we found that white collar were the most exposed group  
6  
7 3 to alcohol abuse with high social relationship at work (RR=1.89 [1.21 – 2.9]). Others studies have  
8  
9 4 approached this subject by pointing out afterwork with colleagues.<sup>57</sup>  
10  
11 5 Work intensity, or high psychological demand in terms of high working time and intensity is associated  
12  
13 6 with depressive symptoms in the meta-analysis by Theorell *et al* (10 studies).<sup>51</sup> The meta-analysis of  
14  
15 7 longitudinal studies by Netterstrom *et al* highlights the adverse effect of high psychological demand on  
16  
17 8 the occurrence of depressive disorders.<sup>53</sup> However, this association could also ensue that persons  
18  
19 9 with depressive disorders have distorted views of psychological demands.<sup>55</sup>  
20  
21 10 High emotional demands at work have already been observed for depressive disorders among  
22  
23 11 women in a population-based nested case-control study of 14,166 psychiatric patients in Denmark  
24  
25 12 (IRR=1.39)<sup>25</sup> or for GAD in the French prospective study SIP (using the same diagnostic tool MINI)  
26  
27 13 (RR=1.66 among workers with high emotional demand<sup>21</sup>). The designs of those two studies argue for  
28  
29 14 the negative effect of high emotional demand on depression and anxiety, but in our cross sectional  
30  
31 15 study the causal attribution is not possible thus it is also possible that people with depression and/or  
32  
33 16 anxiety have a different view towards those demands.<sup>55</sup>  
34  
35 17 Autonomy appears related to alcohol abuse, as reported in an English prospective study: low decision  
36  
37 18 latitude, which is a part of the autonomy axis in our study, is associated to higher risk of alcohol  
38  
39 19 dependence within women.<sup>58</sup>  
40  
41 20 We do not confirm the association found earlier between CMD and high job insecurity or conflict of  
42  
43 21 value.<sup>20 21 23</sup>  
44  
45 22 Based on stress models, our study shows that work intensity and emotional demand are stress  
46  
47 23 factors for GAD/MDD and that social relations at work have a positive effect. For alcohol, autonomy is  
48  
49 24 a stress factor and social relations at work seems to be induced by another mechanism described  
50  
51 25 above.

### 26 4.3 Strengths and limitations of the study

27 Several limitations of our study should be acknowledged.

1  
2  
3 1 First, our study was conducted in the Nord - Pas-de-Calais region, i.e. one of the poorest in France  
4  
5 2 with a total of four millions inhabitants. This region during the first half of the 20<sup>th</sup> century was highly  
6  
7 3 industrialized and has suffered since the 1950s from industrial decline and mines, textile and steel  
8  
9 4 industries gradually closing. Despite the growth of services and some specialized industries (car, rail  
10  
11 5 and glass), levels of education, unemployment (15%), poverty and health indicators (e.g. life  
12  
13 6 expectancy) are unfavourable. The Nord - Pas-de-Calais region has a low density of GPs (11% fewer  
14  
15 7 than in France) and other medical specialities (24% fewer).<sup>59</sup> Moreover, the study was conducted  
16  
17 8 after the 2008 recession, which has been associated with an increase in the prevalence of common  
18  
19 9 mental health disorders worldwide.<sup>60 61</sup> This could lead to a high level of mental disorders. The  
20  
21 10 prevalence of MDD, GAD and alcohol abuse within patient consulting a GP is respectively 19.1%,  
22  
23 11 25.8% and 9.7%. This is consistent in the superior limits with studies in primary care ranging  
24  
25 12 prevalence from 6% to 25% for depression, 3% to 25% for anxiety and 2% to 11% for alcohol  
26  
27 13 abuse.<sup>10 12 27-30</sup> Results should be replicated in others areas.

28  
29 14 Second, a possible weakness is the selective participation of GPs. GPs who have participated in the  
30  
31 15 study could be especially interested in common mental disorders. This interest may be related to the  
32  
33 16 personal interest of the GP, but it could also be related to the GP patient rate of common mental  
34  
35 17 disorders. Therefore, it may cause a larger selection of patient with psychological disorders. However,  
36  
37 18 response rate are similar to previous studies<sup>28 62</sup> and GPs were selected to be representative of the  
38  
39 19 Nord - Pas-de-Calais GPs in term of geographical localization, thereby limiting possible bias. In  
40  
41 20 general practice, GPs' response rate is known to be low<sup>63</sup>, and in order to favour an optimal response  
42  
43 21 rate, we tested the questionnaire to make it parsimonious, GPs were paid for their participation, and  
44  
45 22 GPs who were asked to participate were individually called. Participating GP had similar age, practice  
46  
47 23 and years of practice than all GPs in the region. Patient selection should also be considered.  
48  
49 24 However, a random procedure to define patients included in the study limits this bias. Indeed, GPs  
50  
51 25 were asked to include patient following an inclusion schedule that was provided at the start of the  
52  
53 26 study. This allowed us to include patient in different time slots of the week. Moreover a non-  
54  
55 27 respondent form had to be filled by the GPs but we suppose that the filling rate was low because only  
56  
57 28 41 GPs filled this form and declare that 495 patient were not included. Characteristics of patients

1 included and those not included did not differ in term of age and sex. However it is important to note  
2 that compared to studies in work environment settings, it is possible that patients included in this  
3 primary care setting have a different level of health than other employees who do not consult their  
4 GPs.

5 The measurement of psychosocial work factors was based on an unpublished work of experts in this  
6 field who based their work on international literature, measurement of reliability in our sample was  
7 rather low for some axis ( $\alpha=0.34$  for ethical conflict). The use of a validated questionnaire could have  
8 allowed for a better comparison with the existing literature and better psychometric quality.

9 We were able to take into account many covariates (characterizing individuals, GPs and patients'  
10 context), but nevertheless we missed some other important variables. Indeed, it would have been  
11 informative to control for individual characteristics such as prior history of mental health problems,  
12 social support outside of work or life events that are known to be associated with CMD, thus they  
13 could have an effect on the relationship between CMD and work related factors.

14 Despite these limitations, the results of this work are of interest because they study occupational  
15 factors related to CMD (MDD/GAD and alcohol abuse) among working adults in primary care with a  
16 standardized diagnostic tool (MINI) in a large sample ( $n=2,027$ ).<sup>35</sup> The primary care sample used  
17 allows the inclusion of a representative panel of workers in the labour force including independent  
18 workers, workers in small companies or workers who don't have an occupational physician which is  
19 not the case in most of studies in occupational setting. Indeed, an international study including 49  
20 countries shows that the average occupational health services coverage of workers was 24.8% with a  
21 larger gap among workers in small-scale enterprises, the self-employed, agriculture, and the informal  
22 sector.<sup>64</sup> Moreover the exploratory character of our study confirm the increased risk of  
23 anxiety/depression for work intensity, social support and emotional demands and the link between  
24 autonomy and alcohol abuse in a primary care setting. This study also shows a negative effect of  
25 social support at work for alcohol abuse.<sup>7 21 25 58</sup> However we have to be cautious about these results  
26 and further studies in other areas have to be done in order to confirm our findings.

27



#### 4.4 Conclusion

Our study is one of the first to investigate simultaneously well-known factors related to job strain and effort-reward imbalance models and new occupational factors described in recent literature. To the best of our knowledge, it is the first conducted among working individuals in primary care. Results emphasise the importance of social support at work and different occupational factors that are associated with MDD, GAD and alcohol abuse. These results could be a starting point for the GPs to apprehend these factors with the patient and to communicate with the occupational physician in order to prevent the onset of CMD.

#### ACKNOWLEDGMENT

The authors thank all the participating GPs of the Nord – Pas-de-Calais region and their patients who participated to the Héraclès study. We thank the department of General practice of Lille's university and the regional union of health professional of GP's (URPS-ML) of the Nord – Pas-de-Calais region for their involvement in the GP recruitment phase. We also want to thank the Héraclès study scientific committee members who contributed to the brainstorming and the set-up of this survey

#### CONTRIBUTORS

Study concept and design: MR, NY, MM, AL, TB, LP. Data analysis and collection: MR, LFC, MM, LP. Drafting of the manuscript: MR. Critical revision of the manuscript: NY, MM, AL. All authors have approved the final manuscript.

#### COMPETING INTERESTS

All authors declare that they do not have any competing interests and declare independence from the funders.

#### FUNDING

1  
2  
3  
4  
5  
6  
7  
8  
9  
10  
11  
12  
13  
14  
15  
16  
17  
18  
19  
20  
21  
22  
23  
24  
25  
26  
27  
28  
29  
30  
31  
32  
33  
34  
35  
36  
37  
38  
39  
40  
41  
42  
43  
44  
45  
46  
47  
48  
49  
50  
51  
52  
53  
54  
55  
56  
57  
58  
59  
60

1 This work was supported by the Nord – Pas-de-Calais regional health agency (ARS) and the Ile-de-  
2 France region – DIM Gestes (Mathieu Rivière’s PhD thesis).

3

4 **DATA SHARING STATEMENT**

5 No additional data are available

For peer review only

## 5 REFERENCES

1. Wagenaar AF, Kompier MA, Houtman IL, et al. Employment contracts and health selection: unhealthy employees out and healthy employees in? *J Occup Environ Med* 2012;54(10):1192-200. doi: 10.1097/JOM.0b013e3182717633 [published Online First: 2012/09/22]
2. McLellan RK. Work, Health, And Worker Well-Being: Roles And Opportunities For Employers. *Health Aff (Millwood)* 2017;36(2):206-13. doi: 10.1377/hlthaff.2016.1150 [published Online First: 2017/02/09]
3. Hussey L, Turner S, Thorley K, et al. Work-related ill health in general practice, as reported to a UK-wide surveillance scheme. *Br J Gen Pract* 2008;58(554):637-40. doi: 10.3399/bjgp08X330753 [published Online First: 2008/09/20]
4. Whiteford HA, Degenhardt L, Rehm J, et al. Global burden of disease attributable to mental and substance use disorders: findings from the Global Burden of Disease Study 2010. *Lancet (London, England)* 2013;382(9904):1575-86. doi: 10.1016/s0140-6736(13)61611-6 [published Online First: 2013/09/03]
5. NHI. Description des populations du regime general en arret de travail de 2 a 4 mois 2004 [Available from: [http://fulltext.bdsp.ehesp.fr/Cnamts/Etudes/2004/DESCRIPTION\\_ARRETS\\_TRAVAIL\\_2\\_4\\_MOIS\\_2004.pdf](http://fulltext.bdsp.ehesp.fr/Cnamts/Etudes/2004/DESCRIPTION_ARRETS_TRAVAIL_2_4_MOIS_2004.pdf)].
6. Steel Z, Marnane C, Iranpour C, et al. The global prevalence of common mental disorders: a systematic review and meta-analysis 1980-2013. *Int J Epidemiol* 2014;43(2):476-93. doi: 10.1093/ije/dyu038 [published Online First: 2014/03/22]
7. Harvey SB, Modini M, Joyce S, et al. Can work make you mentally ill? A systematic meta-review of work-related risk factors for common mental health problems. *Occup Environ Med* 2017;74(4):301-10. doi: 10.1136/oemed-2016-104015 [published Online First: 2017/01/22]
8. Reme SE, Grasdal AL, Lovvik C, et al. Work-focused cognitive-behavioural therapy and individual job support to increase work participation in common mental disorders: a randomised controlled multicentre trial. *Occup Environ Med* 2015;72(10):745-52. doi: 10.1136/oemed-2014-102700 [published Online First: 2015/08/08]
9. Stewart WF, Ricci JA, Chee E, et al. Cost of lost productive work time among US workers with depression. *JAMA* 2003;289(23):3135-44. doi: 10.1001/jama.289.23.3135 [published Online First: 2003/06/19]
10. Milanovic SM, Erjavec K, Poljicanin T, et al. Prevalence of depression symptoms and associated socio-demographic factors in primary health care patients. *Psychiatr Danub* 2015;27(1):31-7. [published Online First: 2015/03/10]
11. Freeman A, Tyrovolas S, Koyanagi A, et al. The role of socio-economic status in depression: results from the COURAGE (aging survey in Europe). *BMC Public Health* 2016;16(1):1098. doi: 10.1186/s12889-016-3638-0 [published Online First: 2016/10/21]
12. Ibanez G, Son S, Chastang J, et al. Mental Health Disorders in General Practice in France: A Cross-Sectional Survey. *Transl Biomed* 2016;7:4. doi: 10.2167/2172-0479.100096
13. Lacerda-Pinheiro SF, Pinheiro Junior RF, Pereira de Lima MA, et al. Are there depression and anxiety genetic markers and mutations? A systematic review. *J Affect Disord* 2014;168:387-98. doi: 10.1016/j.jad.2014.07.016 [published Online First: 2014/08/12]
14. Abbas RA, Hammam RA, El-Gohary SS, et al. Screening for common mental disorders and substance abuse among temporary hired cleaners in Egyptian Governmental Hospitals, Zagazig City, Sharqia Governorate. *The international journal of occupational and environmental medicine* 2013;4(1):13-26. [published Online First: 2013/01/03]
15. Karasek R. Job demands, job decision latitude, and mental strain : implication for job redesign. *Adm Sci Q* 1979 24 285-309.

16. Siegrist J. Adverse health effects of high-effort/low-reward conditions. *J Occup Health Psychol* 1996;1(1):27-41. [published Online First: 1996/01/01]
17. Elovainio M, Kivimaki M, Vahtera J. Organizational justice: evidence of a new psychosocial predictor of health. *Am J Public Health* 2002;92(1):105-8. [published Online First: 2002/01/05]
18. Rugulies R, Aust B, Madsen IE. Effort-reward imbalance at work and risk of depressive disorders. A systematic review and meta-analysis of prospective cohort studies. *Scand J Work Environ Health* 2017;43(4):294-306. doi: 10.5271/sjweh.3632 [published Online First: 2017/03/18]
19. Stansfeld S, Candy B. Psychosocial work environment and mental health--a meta-analytic review. *Scand J Work Environ Health* 2006;32(6):443-62. [published Online First: 2006/12/19]
20. Murcia M, Chastang JF, Niedhammer I. Psychosocial work factors, major depressive and generalised anxiety disorders: results from the French national SIP study. *J Affect Disord* 2013;146(3):319-27. doi: 10.1016/j.jad.2012.09.014 [published Online First: 2012/10/13]
21. Niedhammer I, Malard L, Chastang JF. Occupational factors and subsequent major depressive and generalized anxiety disorders in the prospective French national SIP study. *BMC Public Health* 2015;15:200. doi: 10.1186/s12889-015-1559-y [published Online First: 2015/04/18]
22. Gollac M. Mesurer les facteurs psychosociaux de risque au travail pour les maîtriser. 2010 [Available from: [http://travail-emploi.gouv.fr/IMG/pdf/rapport\\_SRPST\\_definitif\\_rectifie\\_11\\_05\\_10.pdf](http://travail-emploi.gouv.fr/IMG/pdf/rapport_SRPST_definitif_rectifie_11_05_10.pdf)]
23. Schutte S, Chastang JF, Parent-Thirion A, et al. Psychosocial work exposures among European employees: explanations for occupational inequalities in mental health. *Journal of public health (Oxford, England)* 2015;37(3):373-88. doi: 10.1093/pubmed/fdv044 [published Online First: 2015/04/26]
24. Marchand A, Parent-Lamarche A, Blanc ME. Work and high-risk alcohol consumption in the Canadian workforce. *International journal of environmental research and public health* 2011;8(7):2692-705. doi: 10.3390/ijerph8072692 [published Online First: 2011/08/17]
25. Wieclaw J, Agerbo E, Mortensen PB, et al. Psychosocial working conditions and the risk of depression and anxiety disorders in the Danish workforce. *BMC Public Health* 2008;8:280. doi: 10.1186/1471-2458-8-280 [published Online First: 2008/08/09]
26. Malard L, Chastang JF, Niedhammer I. Changes in psychosocial work factors in the French working population between 2006 and 2010. *Int Arch Occup Environ Health* 2015;88(2):235-46. doi: 10.1007/s00420-014-0953-6 [published Online First: 2014/06/26]
27. Ansseau M, Dierick M, Buntinx F, et al. High prevalence of mental disorders in primary care. *J Affect Disord* 2004;78(1):49-55. doi: S0165032702002197 [pii] [published Online First: 2003/12/16]
28. Toft T, Fink P, Oernboel E, et al. Mental disorders in primary care: prevalence and co-morbidity among disorders. results from the functional illness in primary care (FIP) study. *Psychol Med* 2005;35(8):1175-84. [published Online First: 2005/08/25]
29. Alkhadhari S, Alsabbri AO, Mohammad IH, et al. Prevalence of psychiatric morbidity in the primary health clinic attendees in Kuwait. *J Affect Disord* 2016;195:15-20. doi: 10.1016/j.jad.2016.01.037 [published Online First: 2016/02/08]
30. Norton J, de Roquefeuil G, David M, et al. [Prevalence of psychiatric disorders in French general practice using the patient health questionnaire: comparison with GP case-recognition and psychotropic medication prescription]. *Encephale* 2009;35(6):560-9. doi: 10.1016/j.encep.2008.06.018 S0013-7006(08)00267-4 [pii] [published Online First: 2009/12/17]
31. Beckley A, Lees B, Collington S, et al. Work-related health advice in primary care. *Occupational medicine* 2011;61(7):498-502. doi: 10.1093/occmed/kqr119 kqr119 [pii] [published Online First: 2011/08/26]

- 1  
2  
3 1 32. de Kock CA, Lucassen PL, Spinnewijn L, et al. How do Dutch GPs address work-related  
4 2 problems? A focus group study. *Eur J Gen Pract* 2016;1-8. doi:  
5 3 10.1080/13814788.2016.1177507 [published Online First: 2016/06/02]  
6 4 33. Riviere M, Plancke L, Leroyer A, et al. Prevalence of work-related common psychiatric disorders  
7 5 in primary care: The French Heracles study. *Psychiatry Res* 2017 doi:  
8 6 10.1016/j.psychres.2017.09.008 [published Online First: 2017/09/19]  
9 7 34. Flahault A, Blanchon T, Dorleans Y, et al. Virtual surveillance of communicable diseases: a 20-  
10 8 year experience in France. *Stat Methods Med Res* 2006;15(5):413-21. [published Online First:  
11 9 2006/11/09]  
12 10 35. Sheehan DV, Lecrubier Y, Sheehan KH, et al. The Mini-International Neuropsychiatric Interview  
13 11 (M.I.N.I.): the development and validation of a structured diagnostic psychiatric interview for  
14 12 DSM-IV and ICD-10. *J Clin Psychiatry* 1998;59 Suppl 20:22-33;quiz 34-57. [published Online  
15 13 First: 1999/01/09]  
16 14 36. Lecrubier Y, Sheehan DV, Weiller E, et al. The Mini International Neuropsychiatric Interview  
17 15 (MINI). A short diagnostic structured interview: reliability and validity according to the CIDI.  
18 16 *European Psychiatry* 1997;12(5):224-31.  
19 17 37. Moorman R. Relationship between organizational justice and organizational citizenship behaviors:  
20 18 do fairness perception influence employee citizenship? *J Appl Psychol* 1991;76:845-55.  
21 19 38. Kristensen TS, Hannerz H, Hogh A, et al. The Copenhagen Psychosocial Questionnaire--a tool for  
22 20 the assessment and improvement of the psychosocial work environment. *Scand J Work Environ*  
23 21 *Health* 2005;31(6):438-49. [published Online First: 2006/01/24]  
24 22 39. Dallner M, Elo A-L, Gamberale F, et al. Validation of the general Nordic questionnaire  
25 23 (QPSNordic) for psychological and social factors at work (No. Nord 2000:12). In: Ministers  
26 24 NCo, ed. Copenhagen, 2000.  
27 25 40. Hansez I. The Working Conditions and Control Questionnaire (WOCCQ): Towards a structural  
28 26 model of psychological stress. *European Review of Applied Psychology* 2008;58(253 - 262)  
29 27 41. INSEE. Nomenclature des Professions et Catégories Socioprofessionnelles - PCS 2003 [Available  
30 28 from: <https://www.insee.fr/fr/information/2400059>.  
31 29 42. Min KB, Park SG, Hwang SH, et al. Precarious employment and the risk of suicidal ideation and  
32 30 suicide attempts. *Preventive medicine* 2015;71:72-6. doi: 10.1016/j.ypmed.2014.12.017  
33 31 [published Online First: 2014/12/24]  
34 32 43. Fleury MJ, Bamvita JM, Farand L, et al. Variables associated with general practitioners taking on  
35 33 patients with common mental disorders. *Mental health in family medicine* 2008;5(3):149-60.  
36 34 [published Online First: 2008/09/01]  
37 35 44. Pampalon R, Hamel D, Gamache P, et al. Validation of a deprivation index for public health: a  
38 36 complex exercise illustrated by the Quebec index. *Chronic diseases and injuries in Canada*  
39 37 2014;34(1):12-22. [published Online First: 2014/03/13]  
40 38 45. Moreno-Betancur M, Latouche A, Menvielle G, et al. Relative index of inequality and slope index  
41 39 of inequality: a structured regression framework for estimation. *Epidemiology (Cambridge,*  
42 40 *Mass)* 2015;26(4):518-27. doi: 10.1097/ede.0000000000000311 [published Online First:  
43 41 2015/05/23]  
44 42 46. Zou G. A modified poisson regression approach to prospective studies with binary data. *Am J*  
45 43 *Epidemiol* 2004;159(7):702-6. [published Online First: 2004/03/23]  
46 44 47. Knol MJ, Le Cessie S, Algra A, et al. Overestimation of risk ratios by odds ratios in trials and  
47 45 cohort studies: alternatives to logistic regression. *CMAJ : Canadian Medical Association*  
48 46 *journal = journal de l'Association medicale canadienne* 2012;184(8):895-9. doi:  
49 47 10.1503/cmaj.101715 [published Online First: 2011/12/14]  
50 48 48. Team RDC. R: A language and environment for statistical computing Vienna, Austria: R  
51 49 Foundation for Statistical Computing; 2008 [Available from: <http://www.R-project.org>.  
52  
53  
54  
55  
56  
57  
58  
59  
60

- 1  
2  
3 1 49. Bates D, Maechler M, Bolker B, et al. Fitting Linear Mixed-Effects Models Using lme4. *Journal of*  
4 2 *Statistical Software* 2015;67(1):1--48. doi: 10.18637/jss.v067.i01
- 5 3 50. Honda A, Date Y, Abe Y, et al. Work-related Stress, Caregiver Role, and Depressive Symptoms  
6 4 among Japanese Workers. *Saf Health Work* 2014;5(1):7-12. doi: 10.1016/j.shaw.2013.11.002  
7 5 [published Online First: 2014/06/17]
- 8 6 51. Theorell T, Hammarström A, Aronsson G, et al. A systematic review including meta-analysis of  
9 7 work environment and depressive symptoms. *BMC Public Health* 2015;15 doi:  
10 8 10.1186/s12889-015-1954-4
- 11 9 52. Wang JL, Lesage A, Schmitz N, et al. The relationship between work stress and mental disorders  
12 10 in men and women: findings from a population-based study. *J Epidemiol Community Health*  
13 11 2008;62(1):42-7. doi: 10.1136/jech.2006.050591 [published Online First: 2007/12/15]
- 14 12 53. Netterstrom B, Conrad N, Bech P, et al. The relation between work-related psychosocial factors  
15 13 and the development of depression. *Epidemiologic reviews* 2008;30:118-32. doi:  
16 14 10.1093/epirev/mxn004 [published Online First: 2008/07/01]
- 17 15 54. Melchior M, Berkman LF, Niedhammer I, et al. Social relations and self-reported health: a  
18 16 prospective analysis of the French Gazel cohort. *Social science & medicine (1982)*  
19 17 2003;56(8):1817-30. [published Online First: 2003/03/18]
- 20 18 55. Beck AT, Brown GK, Steer RA, et al. Psychometric properties of the Beck Self-Esteem Scales.  
21 19 *Behaviour research and therapy* 2001;39(1):115-24. [published Online First: 2000/12/28]
- 22 20 56. Nordaune K, Skarpaas LS, Sagvaag H, et al. Who initiates and organises situations for work-  
23 21 related alcohol use? The WIRUS culture study. *Scandinavian journal of public health*  
24 22 2017;1403494817704109. doi: 10.1177/1403494817704109 [published Online First:  
25 23 2017/07/02]
- 26 24 57. Hagihara A, Tarumi K, Nobutomo K. Work stressors, drinking with colleagues after work, and job  
27 25 satisfaction among white-collar workers in Japan. *Substance use & misuse* 2000;35(5):737-56.  
28 26 [published Online First: 2000/05/12]
- 29 27 58. Head J, Stansfeld SA, Siegrist J. The psychosocial work environment and alcohol dependence: a  
30 28 prospective study. *Occup Environ Med* 2004;61(3):219-24. [published Online First:  
31 29 2004/02/27]
- 32 30 59. Plancke L, Bavdek R. Les disparités régionales en santé mentale et en psychiatrie. La situation du  
33 31 Nord Pas-de-Calais en France métropolitaine, Lille, F2RSM. 2013.  
34 32 [http://www.santementale5962.com/ressources-et-outils/les-editions-de-la-](http://www.santementale5962.com/ressources-et-outils/les-editions-de-la-f2rsm/article/disparites-regionales-en-sante)  
35 33 [f2rsm/article/disparites-regionales-en-sante.](http://www.santementale5962.com/ressources-et-outils/les-editions-de-la-f2rsm/article/disparites-regionales-en-sante)
- 36 34 60. Katikireddi SV, Niedzwiedz CL, Popham F. Trends in population mental health before and after  
37 35 the 2008 recession: a repeat cross-sectional analysis of the 1991-2010 Health Surveys of  
38 36 England. *BMJ Open* 2012;2(5) doi: 10.1136/bmjopen-2012-001790 [published Online First:  
39 37 2012/10/19]
- 40 38 61. Lee S, Guo WJ, Tsang A, et al. Evidence for the 2008 economic crisis exacerbating depression in  
41 39 Hong Kong. *J Affect Disord* 2010;126(1-2):125-33. doi: 10.1016/j.jad.2010.03.007 [published  
42 40 Online First: 2010/04/13]
- 43 41 62. Goldenberg MG, Skeldon SC, Nayan M, et al. Prostate-specific antigen testing for prostate cancer  
44 42 screening: A national survey of Canadian primary care physicians' opinions and practices.  
45 43 *Canadian Urological Association journal = Journal de l'Association des urologues du Canada*  
46 44 2017 doi: 10.5489/cuaj.4486 [published Online First: 2017/11/07]
- 47 45 63. Cottrell E, Roddy E, Rathod T, et al. Maximising response from GPs to questionnaire surveys: do  
48 46 length or incentives make a difference? *BMC medical research methodology* 2015;15:3. doi:  
49 47 10.1186/1471-2288-15-3 [published Online First: 2015/01/08]
- 50 48 64. Rantanen J, Lehtinen S, Valenti A, et al. A global survey on occupational health services in  
51 49 selected international commission on occupational health (ICOH) member countries. *BMC*  
52 50 *Public Health* 2017;17(787) doi: doi:10.1186/s12889-017-4800-z.

1  
2  
3  
4  
5  
6  
7  
8  
9  
10  
11  
12  
13  
14  
15  
16  
17  
18  
19  
20  
21  
22  
23  
24  
25  
26  
27  
28  
29  
30  
31  
32  
33  
34  
35  
36  
37  
38  
39  
40  
41  
42  
43  
44  
45  
46  
47  
48  
49  
50  
51  
52  
53  
54  
55  
56  
57  
58  
59  
60

1  
2  
3  
4

**Legends:**

Figure 1: Flow chart of participation in the Héraclès study, France, 2014

For peer review only

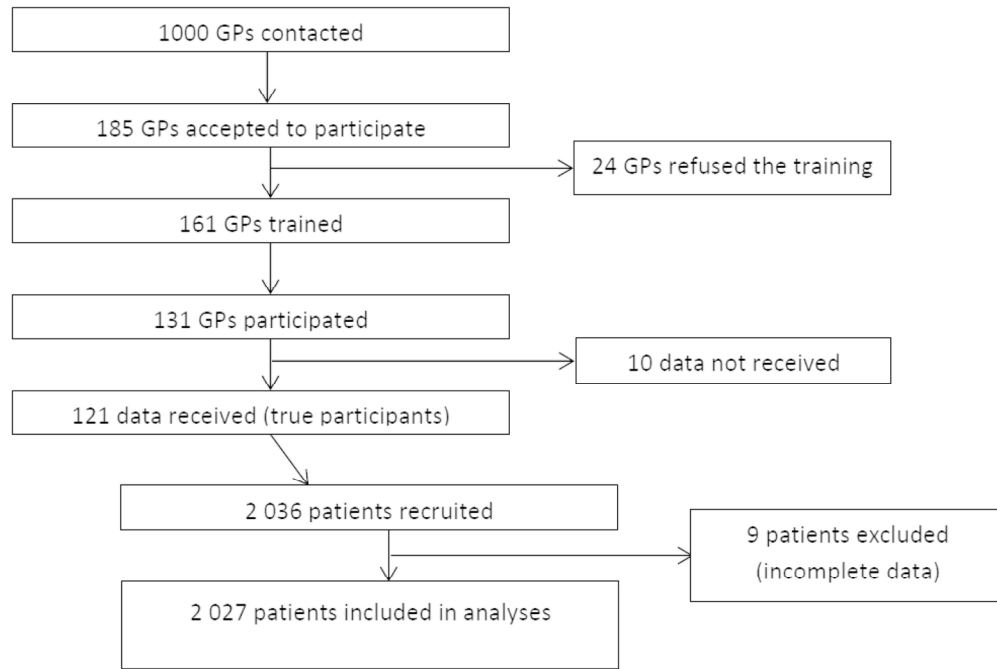

Flow chart of participation in the Heracles study, France, 2014

154x104mm (300 x 300 DPI)



**Appendix 1: Work's factor questionnaire****1) Work intensity**

- I receive contradictory orders or indication (“Yes”/“No”)
- I am asked excessive amounts of work (“Always”/“Often”/“Sometimes”/“Never”)
- I have too much to think about at work (“Always”/“Often”/“Sometimes”/“Never”)
- I have difficulties in balancing work and family life (“Always”/“Often”/“Sometimes”/“Never”)
- I have the time needed to do my work (“Always”/“Often”/“Sometimes”/“Never”)

**2) Emotional demands**

- I work in contact with customers/beneficiaries (“Yes”/“No”)
- I am in contact with people in distress (“Yes”/“No”)
- I have conflicts with customers/beneficiaries (“Always”/“Often”/“Sometimes”/“Never”)
- I have to hide my emotions and pretend to be in a good mood  
 (“Always”/“Often”/“Sometimes”/“Never”)
- I sometimes experience fear during my work (“Always”/“Often”/“Sometimes”/“Never”)
- During my work, I am exposed to physical, verbal, psychological aggressions  
 (“Always”/“Often”/“Sometimes”/“Never”)

**3) Autonomy**

- I have very little freedom to decide how I do my job (“Always”/“Often”/“Sometimes”/“Never”)
- I can fully employ my skills (“Always”/“Often”/“Sometimes”/“Never”)

**4) Conflict of values**

- I have the possibility to make a work of quality (“Always”/“Often”/“Sometimes”/“Never”)
- In my work, I have to do disapproved things (“Always”/“Often”/“Sometimes”/“Never”)

**5) Social relationships at work**

- My work is fully recognized (“Always”/“Often”/“Sometimes”/“Never”)
- I have support from colleagues (“Always”/“Often”/“Sometimes”/“Never”)
- I have support from superior (“Always”/“Often”/“Sometimes”/“Never”)

**6) Insecurity of work**

- I feel able to do my current job until retirement (“Yes”/“No”)
- I work with fear of losing my job (“Always”/“Often”/“Sometimes”/“Never”)

1  
2  
3  
4  
5  
6  
7  
8  
9  
10  
11  
12  
13  
14  
15  
16  
17  
18  
19  
20  
21  
22  
23  
24  
25  
26  
27  
28  
29  
30  
31  
32  
33  
34  
35  
36  
37  
38  
39  
40  
41  
42  
43  
44  
45  
46

**Appendix 2:** Correlation matrix of work characteristics, Héraclès study, France. 2014, Pearson correlation coefficient

|                              | Work intensity | Emotional demands | Autonomy | Conflict of values | Social relationships at work | Insecurity |
|------------------------------|----------------|-------------------|----------|--------------------|------------------------------|------------|
| Work intensity               |                | 0.70              | -0.72    | 0.70               | -0.81                        | 0.08       |
| Emotional demands            | 0.70           |                   | -0.86    | 0.78               | -0.84                        | 0.23       |
| Autonomy                     | -0.72          | -0.86             |          | -0.91              | 0.87                         | -0.42      |
| Conflict of values           | 0.70           | 0.78              | -0.91    |                    | -0.91                        | 0.17       |
| Social relationships at work | -0.81          | -0.84             | 0.87     | -0.91              |                              | -0.33      |
| Insecurity                   | 0.08           | 0.23              | -0.42    | 0.17               | -0.33                        |            |

For peer review only

**Appendix 3:** major depressive disorders (MDD), generalized anxiety disorders (GAD) and alcohol abuse related factors adjusted on work related factors, Héraclès study, France, 2014. Multilevel regression models

|                                         | MDD GAD (n=1782) |               |       | Alcohol (n=1776) |               |       |
|-----------------------------------------|------------------|---------------|-------|------------------|---------------|-------|
|                                         | RR <sup>1</sup>  | CI 95%        | P     | RR <sup>1</sup>  | CI 95%        | P     |
| <b>Age group</b>                        |                  |               | 0.38  |                  |               | 0.34  |
| [18 - 35]                               | 1 -              |               |       | 1 -              |               |       |
| [36 - 50]                               | 1.13             | [0.93 - 1.39] |       | 1.29             | [0.86 - 1.92] |       |
| [51 - 65]                               | 1.03             | [0.82 - 1.29] |       | 1.37             | [0.87 - 2.16] |       |
| <b>Sexe</b>                             |                  |               | 0.34  |                  |               | <0.01 |
| Male                                    | 1 -              |               |       | 1 -              |               |       |
| Female                                  | 1.09             | [0.91 - 1.31] |       | 0.37             | [0.25 - 0.53] |       |
| <b>Past unemployment</b>                |                  |               |       |                  |               | 0.13  |
| No                                      |                  |               |       | 1 -              |               |       |
| Yes                                     |                  |               |       | 1.30             | [0.93 - 1.83] |       |
| <b>Occupational grade</b>               |                  |               | 0.71  |                  |               | 0.09  |
| Blue collar                             | 1 -              |               |       | 1 -              |               |       |
| Pink collar                             | 1.12             | [0.86 - 1.46] |       | 0.61             | [0.39 - 0.98] |       |
| White collar                            | 1.11             | [0.82 - 1.5]  |       | 0.80             | [0.46 - 1.4]  |       |
| <b>Family status</b>                    |                  |               |       |                  |               | 0.11  |
| Lives alone                             |                  |               |       | 1 -              |               |       |
| Lives with partner or parents           |                  |               |       | 1.34             | [0.94 - 1.9]  |       |
| <b>Educational level</b>                |                  |               |       |                  |               | 0.51  |
| < High school degree                    |                  |               |       | 1 -              |               |       |
| ≥ High school degree                    |                  |               |       | 1.14             | [0.77 - 1.7]  |       |
| <b>Job instability</b>                  |                  |               |       |                  |               | 0.21  |
| No                                      |                  |               |       | 1 -              |               |       |
| Yes                                     |                  |               |       | 1.31             | [0.86 - 1.98] |       |
| <b>Number of workers in the company</b> |                  |               |       |                  |               | 0.02  |
| 1 to 10                                 |                  |               |       | 1 -              |               |       |
| 11 to 49                                |                  |               |       | 0.70             | [0.45 - 1.09] |       |
| 50 to 250                               |                  |               |       | 0.83             | [0.52 - 1.3]  |       |
| 250 +                                   |                  |               |       | 0.49             | [0.31 - 0.78] |       |
| <b>Past psychiatric problems</b>        |                  |               | <0.01 |                  |               | 0.02  |
| No                                      | 1 -              |               |       | 1 -              |               |       |
| Yes                                     | 1.58             | [1.27 - 1.96] |       | 1.65             | [1.07 - 2.55] |       |
| <b>Major depressive disorders</b>       |                  |               |       |                  |               | 0.01  |
| No                                      |                  |               |       | 1 -              |               |       |
| Yes                                     |                  |               |       | 1.66             | [1.12 - 2.44] |       |
| <b>Generalized anxiety disorders</b>    |                  |               |       |                  |               | 0.25  |
| No                                      |                  |               |       | 1 -              |               |       |
| Yes                                     |                  |               |       | 1.24             | [0.86 - 1.8]  |       |
| <b>Alcohol</b>                          |                  |               | 0.01  |                  |               |       |
| No                                      | 1 -              |               |       |                  |               |       |
| Yes                                     | 1.38             | [1.09 - 1.75] |       |                  |               |       |
| <b>Material deprivation</b>             |                  |               | 0.04  |                  |               |       |
| No                                      | 1 -              |               |       |                  |               |       |
| Yes                                     | 1.19             | [1.01 - 1.4]  |       |                  |               |       |
| <b>GPs Gender</b>                       |                  |               | 0.02  |                  |               |       |
| Male                                    | 1 -              |               |       |                  |               |       |
| Female                                  | 1.22             | [1.03 - 1.44] |       |                  |               |       |

RR : relative risk

<sup>1</sup> Adjusted on: Work intensity, Emotional demands, Autonomy, Conflict of values, Social relationships at work, Insecurity

STROBE Statement—Checklist of items that should be included in reports of *cross-sectional studies*

|                              | Item No | Recommendation                                                                                                                                                                                                                                                                                                                                                                                                |
|------------------------------|---------|---------------------------------------------------------------------------------------------------------------------------------------------------------------------------------------------------------------------------------------------------------------------------------------------------------------------------------------------------------------------------------------------------------------|
| <b>Title and abstract</b>    | 1       | (a) Indicate the study's design with a commonly used term in the title or the abstract <b>page 1 and 2</b><br>(b) Provide in the abstract an informative and balanced summary of what was done and what was found - <b>page 1 and 2</b>                                                                                                                                                                       |
| <b>Introduction</b>          |         |                                                                                                                                                                                                                                                                                                                                                                                                               |
| Background/rationale         | 2       | Explain the scientific background and rationale for the investigation being reported <b>page 4 and 5</b>                                                                                                                                                                                                                                                                                                      |
| Objectives                   | 3       | State specific objectives, including any prespecified hypotheses - <b>page 4 and 5</b>                                                                                                                                                                                                                                                                                                                        |
| <b>Methods</b>               |         |                                                                                                                                                                                                                                                                                                                                                                                                               |
| Study design                 | 4       | Present key elements of study design early in the paper - <b>page 6</b>                                                                                                                                                                                                                                                                                                                                       |
| Setting                      | 5       | Describe the setting, locations, and relevant dates, including periods of recruitment, exposure, follow-up, and data collection - <b>page 6</b>                                                                                                                                                                                                                                                               |
| Participants                 | 6       | (a) Give the eligibility criteria, and the sources and methods of selection of participants - <b>page 6</b>                                                                                                                                                                                                                                                                                                   |
| Variables                    | 7       | Clearly define all outcomes, exposures, predictors, potential confounders, and effect modifiers. Give diagnostic criteria, if applicable – <b>page 6 to 8</b>                                                                                                                                                                                                                                                 |
| Data sources/<br>measurement | 8*      | For each variable of interest, give sources of data and details of methods of assessment (measurement). Describe comparability of assessment methods if there is more than one group - <b>page 6 to 8</b>                                                                                                                                                                                                     |
| Bias                         | 9       | Describe any efforts to address potential sources of bias – <b>page 6</b>                                                                                                                                                                                                                                                                                                                                     |
| Study size                   | 10      | Explain how the study size was arrived at – <b>page 6</b>                                                                                                                                                                                                                                                                                                                                                     |
| Quantitative variables       | 11      | Explain how quantitative variables were handled in the analyses. If applicable, describe which groupings were chosen and why – <b>page 8 and 9</b>                                                                                                                                                                                                                                                            |
| Statistical methods          | 12      | (a) Describe all statistical methods, including those used to control for confounding <b>page 8 and 9</b><br>(b) Describe any methods used to examine subgroups and interactions<br>(c) Explain how missing data were addressed<br>(d) If applicable, describe analytical methods taking account of sampling strategy<br>(e) Describe any sensitivity analyses                                                |
| <b>Results</b>               |         |                                                                                                                                                                                                                                                                                                                                                                                                               |
| Participants                 | 13*     | (a) Report numbers of individuals at each stage of study—eg numbers potentially eligible, examined for eligibility, confirmed eligible, included in the study, completing follow-up, and analysed – <b>page 10 and figure 1</b><br>(b) Give reasons for non-participation at each stage – <b>figure 1</b><br>(c) Consider use of a flow diagram – <b>figure 1</b>                                             |
| Descriptive data             | 14*     | (a) Give characteristics of study participants (eg demographic, clinical, social) and information on exposures and potential confounders – <b>page 10 to 12</b><br>(b) Indicate number of participants with missing data for each variable of interest                                                                                                                                                        |
| Outcome data                 | 15*     | Report numbers of outcome events or summary measures – <b>page 13</b>                                                                                                                                                                                                                                                                                                                                         |
| Main results                 | 16      | (a) Give unadjusted estimates and, if applicable, confounder-adjusted estimates and their precision (eg, 95% confidence interval). Make clear which confounders were adjusted for and why they were included – <b>page 13 to 17</b><br>(b) Report category boundaries when continuous variables were categorized<br>(c) If relevant, consider translating estimates of relative risk into absolute risk for a |

1  
2  
3  
4  
5  
6  
7  
8  
9  
10  
11  
12  
13  
14  
15  
16  
17  
18  
19  
20  
21  
22  
23  
24  
25  
26  
27  
28  
29  
30  
31  
32  
33  
34  
35  
36  
37  
38  
39  
40  
41  
42  
43  
44  
45  
46  
47  
48  
49  
50  
51  
52  
53  
54  
55  
56  
57  
58  
59  
60

|                          |    |                                                                                                                                                                                                    |
|--------------------------|----|----------------------------------------------------------------------------------------------------------------------------------------------------------------------------------------------------|
|                          |    | meaningful time period                                                                                                                                                                             |
| Other analyses           | 17 | Report other analyses done—eg analyses of subgroups and interactions, and sensitivity analyses                                                                                                     |
| <b>Discussion</b>        |    |                                                                                                                                                                                                    |
| Key results              | 18 | Summarise key results with reference to study objectives – <b>page 18</b>                                                                                                                          |
| Limitations              | 19 | Discuss limitations of the study, taking into account sources of potential bias or imprecision. Discuss both direction and magnitude of any potential bias – <b>page 19 and 20</b>                 |
| Interpretation           | 20 | Give a cautious overall interpretation of results considering objectives, limitations, multiplicity of analyses, results from similar studies, and other relevant evidence – <b>page 18 and 19</b> |
| Generalisability         | 21 | Discuss the generalisability (external validity) of the study results – <b>page 20 and 21</b>                                                                                                      |
| <b>Other information</b> |    |                                                                                                                                                                                                    |
| Funding                  | 22 | Give the source of funding and the role of the funders for the present study and, if applicable, for the original study on which the present article is based – <b>page 21</b>                     |

\*Give information separately for exposed and unexposed groups.

**Note:** An Explanation and Elaboration article discusses each checklist item and gives methodological background and published examples of transparent reporting. The STROBE checklist is best used in conjunction with this article (freely available on the Web sites of PLoS Medicine at <http://www.plosmedicine.org/>, Annals of Internal Medicine at <http://www.annals.org/>, and Epidemiology at <http://www.epidem.com/>). Information on the STROBE Initiative is available at [www.strobe-statement.org](http://www.strobe-statement.org).

# BMJ Open

## Which work-related characteristics are most strongly associated with common mental disorders?: A cross-sectional study

|                                 |                                                                                                                                                                                                                                                                                                                                                                                                                                                                                                                                                                                                                                                                                                                                                                                                                                                                                                                                                                  |
|---------------------------------|------------------------------------------------------------------------------------------------------------------------------------------------------------------------------------------------------------------------------------------------------------------------------------------------------------------------------------------------------------------------------------------------------------------------------------------------------------------------------------------------------------------------------------------------------------------------------------------------------------------------------------------------------------------------------------------------------------------------------------------------------------------------------------------------------------------------------------------------------------------------------------------------------------------------------------------------------------------|
| Journal:                        | <i>BMJ Open</i>                                                                                                                                                                                                                                                                                                                                                                                                                                                                                                                                                                                                                                                                                                                                                                                                                                                                                                                                                  |
| Manuscript ID                   | bmjopen-2017-020770.R2                                                                                                                                                                                                                                                                                                                                                                                                                                                                                                                                                                                                                                                                                                                                                                                                                                                                                                                                           |
| Article Type:                   | Research                                                                                                                                                                                                                                                                                                                                                                                                                                                                                                                                                                                                                                                                                                                                                                                                                                                                                                                                                         |
| Date Submitted by the Author:   | 18-May-2018                                                                                                                                                                                                                                                                                                                                                                                                                                                                                                                                                                                                                                                                                                                                                                                                                                                                                                                                                      |
| Complete List of Authors:       | Riviere, Mathieu; Sorbonne Universités, UPMC Univ Paris 06, INSERM, Institut Pierre Louis d'épidémiologie et de Santé Publique (IPLESP UMRS 1136); Centre Hospitalier Régional, Department of Infectious Diseases Leroyer, Ariane; Centre Hospitalier Regional Universitaire de Lille, Occupational Health<br>Ferreira Carreira, Lionel; Centre Hospitalier Regional Universitaire de Lille, Occupational Health<br>Blanchon, Thierry; Sorbonne Universités, UPMC Univ Paris 06, INSERM, Institut Pierre Louis d'épidémiologie et de Santé Publique (IPLESP UMRS 1136)<br>Plancke, Laurent; Fédération régionale de recherche en psychiatrie et santé mentale Hauts-de-France<br>Melchior, Maria; Sorbonne Universités, UPMC Univ Paris 06, INSERM, Institut Pierre Louis d'épidémiologie et de Santé Publique (IPLESP UMRS 1136)<br>Younès, Nadia; EA 40-47 University of Versailles Saint-Quentin; Academic Unit of psychiatry for adults, Versailles Hospital |
| <b>Primary Subject Heading</b>: | Occupational and environmental medicine                                                                                                                                                                                                                                                                                                                                                                                                                                                                                                                                                                                                                                                                                                                                                                                                                                                                                                                          |
| Secondary Subject Heading:      | Mental health, General practice / Family practice                                                                                                                                                                                                                                                                                                                                                                                                                                                                                                                                                                                                                                                                                                                                                                                                                                                                                                                |
| Keywords:                       | PRIMARY CARE, PSYCHIATRY, OCCUPATIONAL & INDUSTRIAL MEDICINE                                                                                                                                                                                                                                                                                                                                                                                                                                                                                                                                                                                                                                                                                                                                                                                                                                                                                                     |
|                                 |                                                                                                                                                                                                                                                                                                                                                                                                                                                                                                                                                                                                                                                                                                                                                                                                                                                                                                                                                                  |

SCHOLARONE™  
Manuscripts

1  
2  
3 1  
4 2 Which work-related characteristics are most strongly associated with common mental  
5 3 disorders? : A cross-sectional study  
6 4

7 5 Mathieu Rivière<sup>a,b</sup>, Ariane Leroyer<sup>c</sup>, Lionel Ferreira Carreira<sup>c</sup>, Thierry Blanchon<sup>a</sup>, Laurent Plancke<sup>d</sup>,  
8  
9 6 Maria Melchior<sup>a</sup>, Nadia Younès<sup>e,f</sup>

10  
11 7  
12 8 a Sorbonne Universités, UPMC Univ Paris 06, INSERM, Institut Pierre Louis d'épidémiologie et de Santé Publique  
13 9 (IPLESP UMRS 1136), F75013, Paris, France

14  
15 10 b Department of Infectious Diseases, Centre Hospitalier Régional, Orléans, France

16  
17 11 c Université Lille Nord de France, Lille, France

18  
19 12 d Fédération régionale de recherche en santé mentale (F2RSM) Nord - Pas-de-Calais, Lille, France

20  
21 13 e EA 40-47 University of Versailles Saint-Quentin, Versailles, France

22  
23 14 f Academic Unit of psychiatry for adults, Versailles Hospital, Versailles, France

24  
25 15  
26 16  
27 17  
28 18 Word count: 4,185  
29 19

30  
31 20  
32 21 Corresponding author:

33  
34 22 Mathieu Rivière

35  
36 23 Réseau Sentinelles, Centre hospitalier régional d'Orléans 1 rue porte Madeleine, 45000 Orléans, France

37  
38 24 Phone : 00 33 (2) 38 74 40 05. Fax : 00 33 (2) 76 34 16 38

39  
40 25 E-mail : mathieu.riviere@iplesp.upmc.fr  
41 26  
42  
43  
44  
45  
46  
47  
48  
49  
50  
51  
52  
53  
54  
55  
56  
57  
58  
59  
60

## 1 **ABSTRACT**

2 **OBJECTIVES:** Studies exploring work-related risk factors of common mental disorders (CMD) such  
3 as major depressive disorder (MDD), generalized anxiety disorder (GAD) or alcohol abuse, have  
4 generally focused on a limited set of work characteristics. For the first time in a primary care setting,  
5 we examine simultaneously multiple work-related risk factors in relation to CMDs.

6 **METHOD:** We use data from a study of working individuals recruited among 2,027 patients of 121  
7 general practitioners (GPs) representative of the Nord - Pas-de-Calais region in the North of France  
8 (April-August 2014). CMDs (MDD; GAD; alcohol abuse) were assessed using the MINI (Mini  
9 International Neuropsychiatric Interview). Six worked-related factors were examined (work intensity,  
10 emotional demands, autonomy, social relations at work, conflict in values, and job insecurity).  
11 Several covariates were considered (patient, GP and contextual characteristics). To study the  
12 association between workplace risk factors and CMDs, we used multilevel Poisson regression  
13 models adjusted for covariates.

14  
15 **RESULTS:** Among study participants, 389 (19.1%) met criteria for MDD, 522 (25.8%) for GAD and  
16 196 (9.7%) for alcohol abuse. In multivariable analyses adjusted for covariates, MDD/GAD was  
17 significantly associated with work intensity (RR=1.16 [1.06 - 1.27]) (absolute risk = 52.8%),  
18 emotional demands (RR=1.24 [1.13 - 1.35]) (absolute risk = 54.9%) and social relations at work  
19 (RR=0.78 [0.70 - 0.87]) (absolute risk = 15.0%); alcohol abuse was associated with social relations  
20 at work (RR=1.25 [1.01 - 1.53]) (absolute risk = 7.6%) and autonomy (OR=0.82 [0.67 - 0.99])  
21 (absolute risk = 8.9%).

22  
23 **CONCLUSIONS:** Several workplace factors are associated with CMDs among working individuals  
24 seen by a GP. These findings confirm the role of organizational characteristics of work as a correlate  
25 of psychological difficulties above and beyond other sources of risk.

26  
27 **Key terms:** mental health; primary care; workplace factors



## STRENGTHS AND LIMITATIONS OF THE STUDY

- Cross-sectional study design
- Study of occupational factors in relation to common mental disorders among working adults in primary care evaluated with a standardized diagnostic tool in a large sample
- The inclusion of participants living in the Nord Pas de Calais region – one of the poorest in France – and the selective participation of general practitioners (GPs) who took part in the study, may have led to an overrepresentation of patients with psychological disorders.

## 1 INTRODUCTION

Individuals who are part of the labour force are generally in better health than the unemployed,<sup>1</sup> however work can also have negative effects on somatic and psychosocial health.<sup>2</sup> A study conducted among general practitioners (GP) trained in occupational medicine found that mental health issues are frequently attributed to work.<sup>3</sup> They are responsible for most of sickness absence and long-term work incapacity.<sup>4</sup> In France, data from the national health insurance shows that 20% of sickness absences are caused by mental disorders, and this proportion is even higher for long term sickness absences (on average 111 days).<sup>5</sup> The most frequent mental health difficulties among working individuals include mood, anxiety and substance use disorders (particularly alcohol-related problems), which can be grouped as “Common Mental Disorders” (CMDs).<sup>6</sup> A systematic review of the literature in European countries shows that there is great diversity in the ascertainment of mental disorders and thus the prevalence estimates vary between countries. The authors suggest that the study of a larger range of diagnoses and the standardization of methods can help the comparability across countries.<sup>7</sup>

The association between work and CMDs is bidirectional: work has been shown to be a risk factor of poor mental health<sup>8</sup>, but the presence of a CMD can also influence job performance and well-being.<sup>9 10</sup> Other risk factors of CMDs include individuals’ sociodemographic characteristics including being divorced or widowed, having a low educational level, older age, female gender,<sup>11-13</sup>, certain genetic factors<sup>14</sup> and a history of chronic somatic or psychiatric disorders.<sup>15</sup> Environmental factors (e.g. social and material deprivation, etc.) were described and show that low socio-economic status was associated with higher rates of depression.<sup>11 12</sup>

Psychosocial factors related to the work environment are of particular interest because they may be more easily prevented than those which result from life events and are often unavoidable. Three main theoretical models have been proposed to explain relations between work characteristics and mental health. First, Karasek and Theorell<sup>16</sup> argued that psychological demands, decision latitude and social support are especially important. Second, Siegrist<sup>17</sup> proposed that what matters most is the subjectively ascertained effort-reward balance. A third model, developed by

1  
2 1 Elovainio, put an emphasis on the role of organizational justice including interpersonal comparison,  
3  
4 2 that is to say comparison of the response of the company in the same situation for different  
5  
6 3 employees.<sup>18</sup>

7  
8 4 Several studies evaluate the impact of work on mental health using these theoretical models.<sup>8 19</sup>  
9  
10 5 <sup>20</sup> Overall, the risk of mental disorders is higher when individuals experience high job demands, low  
11  
12 6 job control, high effort-reward imbalance or low organizational justice. As work organization is  
13  
14 7 evolving, other psychosocial factors described as “emergent” have appeared in recent studies (e.g.  
15  
16 8 job insecurity, conflicts in values)<sup>21-24</sup>: Workers experiencing high job insecurity or role conflicts also  
17  
18 9 seem to have a higher levels of CMDs.<sup>21 22</sup> A recent systematic meta-review identified three  
19  
20 10 overlapping categories of work-related risk factors that may contribute to the development of  
21  
22 11 common mental health problems: imbalanced job design, occupational uncertainty and a lack of  
23  
24 12 values and respect in the workplace.<sup>8</sup> This review did not precisely describe different CMDs (MDD  
25  
26 13 was the most frequent outcome, GAD and alcohol abuse being less explored<sup>8 25 26</sup>). Additionally,  
27  
28 14 most studies were based on self-reported questionnaires and not validated diagnostic interviews.

29  
30 15 Work-related risk factors are also influenced by changes in society and work environments  
31  
32 16 (globalization, demographic change, job specialization, communication load, new forms of work  
33  
34 17 organization, industry 4.0<sup>27</sup>, etc). A French study assessed changes in psychosocial work factors  
35  
36 18 between 2006 and 2011 and reported that some worsened (decision latitude, social support, reward,  
37  
38 19 role conflict and work life imbalance) over that period. These changes have been shown to vary with  
39  
40 20 age, occupation, sector activity and type of contract.<sup>28</sup>

41  
42 21 The objective of this study is to assess the association between GAD, MDD and alcohol abuse  
43  
44 22 in a primary care setting, testing different psychosocial work-related risk factors. Combining  
45  
46 23 emergent and classical factors is important in order to identify which are most strongly related to  
47  
48 24 workers’ mental health, as outlined in the meta-review conducted by Harvey *et al.*<sup>8</sup> Since GPs  
49  
50 25 usually are the first contact point for employees in the health care process, the evaluation of primary  
51  
52 26 care patients is of paramount importance.<sup>29 30</sup> In primary care, the prevalence of CMDs is high,  
53  
54 27 ranging from 3%<sup>22</sup> to 25% for anxiety disorders,<sup>13 29-32</sup> 6%<sup>13</sup> to 25% for depression<sup>11 29-32</sup> and 2%<sup>30</sup> to  
55  
56 28 11% for alcohol abuse.<sup>29 30</sup> Two studies conducted in the United Kingdom show that a third of

1 patients seeing a GP for work-related reasons have a mental health issue.<sup>33</sup> Yet GPs often have  
2 difficulties managing their patients' work-related mental health problems, as they often lack  
3 negotiation strategies regarding sick leave, communication skills and cooperation with occupational  
4 physicians.<sup>34</sup> GPs encounter a variety of workers with systematic, unsystematic or non-existing  
5 occupational health services at their workplace. A better understanding of work-related factors  
6 associated with individuals' mental health is important to help GPs consider specific actions.

7

For peer review only

## 2 METHODS

### 2.1 Design and Study population

Heracles is a cross-sectional exploratory study conducted between April and August 2014 among working individuals consulting a primary care physician in the Nord - Pas-de-Calais region in the North of France.

#### 2.1.1 Patient and Public Involvement

The number of subjects needed and the set-up of the study have previously been described<sup>35</sup>. Briefly, with an estimated prevalence of 20%, to have a precision of 10%, we aimed to include 2,000 patients via their GP. Participating GPs gave an oral consent to participate and were asked to randomly include a maximum of 24 patients who met the following criteria: being a) actively employed and b) aged 18 to 65 years, regardless of the reason of their medical appointment. GPs were asked to include the first two patients who met study inclusion criteria in each randomly selected time slot which had previously been defined with the GP. Approximately ¼ of the GPs in the region, selected to be representative of those practicing in 15 areas of Nord – Pas-de-Calais region, were contacted to participate in the study. Participating GPs gave written information to their patients regarding the study and asked them to sign an informed consent.

This study was conducted by the Sentinelles network,<sup>36</sup> part of the INSERM-Paris Sorbonne University research unit UMR-S 1136. This research group has a standing authorization from the French independent administrative authority protecting privacy and personal data to conduct research among GPs and their patients (CNIL n°471 393).

### 2.2 Data collection

Participating GPs received a 15 minute phone training regarding the study protocol and questionnaire. After their regular appointment, GPs interviewed participating patients for the purposes of the study. Study questionnaires included information on:

### 2.2.1 Measurement of common mental disorders

CMDs were measured using a standardised diagnostic interview: the Mini International Neuropsychiatric Interview (MINI) that was used as a screening tool. The MINI is, a structured clinical interview that enables the diagnosis of mental disorders based on the Diagnosis and Statistical Manual of Mental Disorders, fourth edition (DSM-IV).<sup>37</sup> Specifically, three different diagnoses were ascertained: Major Depressive Disorder (MDD) (in the preceding 2 weeks), Generalised Anxiety Disorder (GAD) (in the preceding 6 months), and alcohol abuse (in the preceding 12 months).

The sensibility of the MINI varied between 83 to 94% (MDD: 94%; GAD: 88%; Alcohol: 83%), the specificity between 72 to 97% (MDD: 79%; GAD: 72%; Alcohol: 97%) and the Kappa concordance coefficient between 0.36 to 0.82 (MDD: 0.73; GAD: 0.36; Alcohol: 0.82). The inter-rater and test-retest reliability measured by Kappa coefficient were good, respectively 0.88 to 1 and 0.76 to 0.93.<sup>38</sup>

### 2.2.2 Work characteristics

Work characteristics were self-reported by the patient to their GP. We used a national French questionnaire proposed by experts in the field based on the international scientific literature and after auditioning Robert Karasek and Johannes Siegrist.<sup>23</sup> It combines a) questions measuring psychological demands – work control – social support developed in Karasek's model<sup>16</sup> (two questions about decision latitude, four questions about psychological demands and two questions about social support) ; b) questions measuring effort/reward balance based on Siegrist's model<sup>17</sup> (three questions about rewards and one question about overinvestment); c) questions about organizational justice from Moorman's questionnaire;<sup>39</sup> d) questions from the Copenhagen Psychosocial Questionnaire<sup>40</sup> and from the General Nordic Questionnaire for Psychological and Social Factors at Work<sup>41</sup> or from WOrking Conditions and Control Questionnaire (WOCCQ)<sup>42</sup>. Overall, the questionnaire included twenty work-related items exploring six different areas (Appendix 1): 1) five related to work intensity and duration (contradictory orders, excessive amount of work, too much to think about at work, difficulties in balancing work and family life, time needed for work), 2) six concerning emotional demands (contacts with customers/beneficiaries, contact with people in

1  
2 1 distress, conflicts with customers/beneficiaries, the need to hide emotions, fear, exposure to  
3  
4 2 aggressions), 3) two regarding autonomy (limited decision making possibility, full use of skills), 4)  
5  
6 3 three on the quality of social work relations (full-recognition of the work performed, support from  
7  
8 4 colleagues, support from superiors), 5) two concerning conflicts in values (possibility to perform  
9  
10 5 quality work, doing disapproved things), 6) two about job insecurity (ability to work until retirement,  
11  
12 6 fear of job loss). For four of these items (contacts with the public at work, contacts with people in  
13  
14 7 distress, contradictory orders, ability to work until retirement) the response was either “yes” or “no”,  
15  
16 8 and for other factors the responses were “always”/“often”/“sometimes”/“never” numbered from 1 to  
17  
18 9 4. The reliability of questions pertaining to work characteristics was assessed by computing an  
19  
20 10 omega coefficient<sup>43</sup>. This coefficient varied between 0.35 to 0.79. The reliability was higher for social  
21  
22 11 relations at work ( $\omega =0.72$ ), emotional demands ( $\omega =0.75$ ) and work intensity ( $\omega =0.79$ ) than for  
23  
24 12 autonomy ( $\omega =0.66$ ), job insecurity ( $\omega =0.50$ ), or conflicts in values ( $\omega=0.35$ ).

### 25 26 13 2.2.3 Covariates

#### 27 28 29 14 *Patient's characteristics*

30  
31  
32 15 We considered already previously risk-factors of CMD.<sup>11</sup>

- 33  
34 16 • Past somatic problems;
- 35  
36 17 • Previous mental health problems/disorders;
- 37  
38 18 • Sociodemographic (age, gender, family status, family income, level of education);
- 39  
40 19 • Occupational grade<sup>44</sup>: blue collar (farmer/manual worker), pink collar  
41  
42 20 (technician/associate professional/clerk/service worker) or white collar  
43  
44 21 (manager/professional);<sup>45</sup>
- 45  
46 22 • Company size;
- 47  
48 23 • Job instability assessed based on the type of contract (temporary vs. permanent)
- 49  
50 24

#### 51 52 25 *Health care characteristics*<sup>46</sup>

- 53  
54  
55 26 • Reason for medical appointment (somatic, psychological, chronic disease management);
- 56  
57  
58  
59  
60

- 1 • GP's sociodemographic characteristics (age, gender);
- 2 • Practice characteristics (size; comfort with psychological distress issues; opportunity to
- 3 collaborate with mental health specialists).

#### 4 *Contextual characteristics (by the 15 proximity area of the region)*

5 Contextual characteristics shown to be associated with CMDs in primary care<sup>11 12</sup>:

- 6 • Density of psychiatrists, psychologists and GPs;
- 7 • Social deprivation (loneliness, single parenthood, widowhood/divorce) and material
- 8 deprivation (unemployment, income, level of not graduated),<sup>47 48</sup>
- 9 • Geographical area: 15 proximity areas defined by the regional health agency of the Nord
- 10 – Pas-de-Calais region.

### 11 **2.3 Statistical Analyses**

12 Some of the covariates were recoded to use fewer categories. For family status, participants living

13 alone or living with parents were grouped into one category. For family income, participants were

14 grouped in two categories: [0-3,000] euros (which corresponds to approximately two times the

15 minimum wage in France) and >3,000 euros. For educational level, we created two categories: less

16 than a high school degree (no degree, degree below high school) or a degree higher or equivalent to

17 a high school degree. For age, our continuous variable was studied in three categories based on the

18 distribution 18-35; 36-50; 51-65.

19 Associations between sociodemographic characteristics and GAD, MDD and alcohol abuse were

20 studied using the Chi-square test. Covariates associated with the outcomes with  $p < 0.2$  were

21 included in the multivariate analysis.

22 Work-related factors were regrouped according to 6 previously suggested dimensions transformed

23 each into a Z-score to be comparable to each other.<sup>23</sup> A correlation matrix of different work

24 characteristics was computed and presented in a supplementary file (Appendix 2). Each dimension

25 was dichotomized based on the third quartile or studied as continuous variable in the multivariable

26 models. At first, statistical analyses were conducted separately for each outcome, but factors



1 associated with MDD and GAD were very similar, therefore to gain statistical power we merged  
2 these two disorders into one outcome. To study the association between occupational factors and  
3 GAD/MDD and alcohol we used multilevel Poisson regression models using a robust error variance  
4 procedure (sandwich estimation)<sup>49</sup> with patient as level one and geographical area as level two.  
5 Given the high prevalence of these problems, Poisson regression was preferred to logistic  
6 regression to avoid the overestimation of risk ratios.<sup>50</sup> GAD/MDD or alcohol abuse were the  
7 dependent variables and the six dimensions of work-related factors were the exposure variables.  
8 Statistical models were adjusted for each exposure variable and for other covariates that were  
9 associated with GAD/MDD (previous mental health problems/disorders, alcohol abuse, material  
10 deprivation and GP's gender) or alcohol abuse (family status, company size, previous mental health  
11 problems/disorders, job instability, education level, past unemployment, GAD and MDD) ( $p < 0.05$ ) in  
12 a multivariable Poisson regression model excluding occupational factors. Age, gender and  
13 occupational grade were included directly in the adjustment variable. Absolute risks among persons  
14 who were exposed were computed for each of the studied work dimensions.  
15 All analyses were performed using GNU R software version 3.1.1. (lme4 package).<sup>51 52</sup>

## 3 RESULTS

### 3.1 Participation and description of the population

Of the 1,000 GPs contacted by mail, 185 accepted to participate (response rate= 18.5%) and 121 completed the study (Figure 1). Participating GPs were more likely to be male (sex ratio=1.82), and to be 50 years or older; they were disseminated throughout the Nord - Pas-de-Calais region (Table 1). Participating GPs were representative of those practicing in the region in terms of geography, age, type and years of practice.

Participating GPs recruited 2,027 patients among which 389 (19.1%) had MDD, 522 (25.8%) GAD and 196 (9.7%) alcohol abuse. Participating patients were mostly female (53.6%), aged 42.3 years (sd 10.6) on average, mainly living with a partner (76.2%), working in pink collar occupations (60.1%). 61.3% had graduated from high school and 30.2% had been unemployed in the past. Among study participants, 21.0% came to see their GP for psychological reasons (Table 1). Characteristics of participants with MDD, GAD or alcohol abuse are presented in Table 2.

The study response rate was 80%: 41 GPs filled a non-respondent form for 495 patients who refused to participate. Non-respondents did not differ from participants in term of age ( $p= 0.47$ ) and gender ( $p=0.23$ ). Compared with working age patients consulting a GP in the study region, study participants were older ( $p<0.01$ ) but had a similar gender distribution ( $p=0.08$ ).

1 **Table 1:** Description of the study population, Héraclès study, France, 2014

|                                           | N     | %    |
|-------------------------------------------|-------|------|
| <b>Work Characteristics</b>               |       |      |
| Work intensity                            |       |      |
| High                                      | 437   | 21.6 |
| Low                                       | 1,588 | 78.3 |
| Emotional demands                         |       |      |
| High                                      | 476   | 23.5 |
| Low                                       | 1,549 | 76.4 |
| Autonomy                                  |       |      |
| High                                      | 598   | 29.5 |
| Low                                       | 1,427 | 70.4 |
| Conflict in values                        |       |      |
| High                                      | 685   | 33.8 |
| Low                                       | 1,340 | 66.1 |
| Social relations at work                  |       |      |
| High                                      | 688   | 33.9 |
| Low                                       | 1,337 | 66.0 |
| Job Insecurity                            |       |      |
| High                                      | 565   | 27.9 |
| Low                                       | 1,460 | 72.0 |
| <b>Covariates</b>                         |       |      |
| <b>Patient Characteristics</b>            |       |      |
| Gender                                    |       |      |
| Male                                      | 939   | 46.4 |
| Female                                    | 1,086 | 53.6 |
| Age group                                 |       |      |
| [18-35]                                   | 597   | 29.5 |
| [36-50]                                   | 872   | 43.1 |
| [51-65]                                   | 552   | 27.3 |
| Occupational grade                        |       |      |
| Blue collar                               | 273   | 13.9 |
| Pink collar                               | 1,185 | 60.1 |
| White collar                              | 513   | 26.0 |
| Educational level                         |       |      |
| < High school degree                      | 780   | 38.7 |
| ≥ High school degree                      | 1,238 | 61.3 |
| Family status                             |       |      |
| Lives alone                               | 481   | 23.8 |
| Lives with a partner or parents           | 1,543 | 76.2 |
| Household income (in €)                   |       |      |
| [0-3.000]                                 | 491   | 30.6 |
| 3.000 +                                   | 1,112 | 69.4 |
| Company size                              |       |      |
| 1 to 10                                   | 361   | 18.4 |
| 11 to 50                                  | 490   | 25.0 |
| 51 to 250                                 | 420   | 21.5 |
| 250 +                                     | 687   | 35.1 |
| Previous mental health problems/disorders |       |      |
| Yes                                       | 189   | 9.8  |
| No                                        | 1,735 | 90.2 |
| Past somatic problems                     |       |      |
| Yes                                       | 559   | 28.9 |
| No                                        | 1,373 | 71.1 |

2

3

1 **Table 1: (continued)**

|                                                         | N     | %    |
|---------------------------------------------------------|-------|------|
| Purpose of consultation with GP                         |       |      |
| Somatic                                                 |       |      |
| Yes                                                     | 1,331 | 65.7 |
| No                                                      | 696   | 34.3 |
| Psychological                                           |       |      |
| Yes                                                     | 425   | 21.0 |
| No                                                      | 1,602 | 79.0 |
| Chronic disease management                              |       |      |
| Yes                                                     | 313   | 15.4 |
| No                                                      | 1,714 | 84.6 |
| Past unemployment                                       |       |      |
| Yes                                                     | 613   | 30.2 |
| No                                                      | 1,414 | 69.8 |
| Job instability                                         |       |      |
| Yes                                                     | 522   | 33.0 |
| No                                                      | 1,061 | 67.0 |
| <b>GPs characteristics</b>                              |       |      |
| GP's gender                                             |       |      |
| Male                                                    | 1,364 | 67.3 |
| Female                                                  | 663   | 32.7 |
| GP's age                                                |       |      |
| [18-39]                                                 | 194   | 9.6  |
| [40-49]                                                 | 626   | 30.9 |
| [50-59]                                                 | 832   | 41.0 |
| 60 +                                                    | 375   | 18.5 |
| Size of practice population                             |       |      |
| 0-500                                                   | 211   | 11.2 |
| 5000 - 1000                                             | 993   | 52.5 |
| 1000- 1500                                              | 433   | 22.9 |
| 1500+                                                   | 253   | 13.4 |
| Comfort with Mental health problems                     |       |      |
| High                                                    | 1,600 | 82.6 |
| Low                                                     | 338   | 17.4 |
| High opportunity to work with mental health specialists |       |      |
| High                                                    | 1,036 | 52.4 |
| Low                                                     | 941   | 47.6 |
| <b>Contextual characteristics</b>                       |       |      |
| Social deprivation                                      |       |      |
| High                                                    | 552   | 27.2 |
| Low                                                     | 1,475 | 72.8 |
| Material deprivation                                    |       |      |
| High                                                    | 850   | 41.9 |
| Low                                                     | 1,177 | 58.1 |
| Density of psychiatrist                                 |       |      |
| High                                                    | 1,569 | 77.4 |
| Low                                                     | 458   | 22.6 |
| Density of psychologist                                 |       |      |
| High                                                    | 1,554 | 76.7 |
| Low                                                     | 473   | 23.3 |
| Density of GP                                           |       |      |
| High                                                    | 1,525 | 75.2 |
| Low                                                     | 502   | 24.8 |
| Geographical area                                       |       |      |
| Métropole Flandre intérieure                            | 1,035 | 51.1 |
| Hainault - Cambrésis                                    | 333   | 16.4 |
| Artois - Douaisis                                       | 337   | 16.6 |
| Littoral                                                | 322   | 15.9 |

2

### 3.2 MDD, GAD and alcohol abuse and related work factors

#### 2 Bivariate analysis (Table 2)

3 In bivariate analyses, female gender was significantly associated with GAD/MDD and male gender  
4 with alcohol abuse. Family status, company size, previous mental health problems/disorders,  
5 consultation for psychiatric, somatic or chronic diseases and job insecurity were also significantly  
6 associated with the two outcomes. Occupational grade, education level and past unemployment  
7 were significantly associated ( $p < 0.01$ ) only with alcohol abuse, with elevated rates in blue collar  
8 workers, patients who experienced unemployment and individuals with an education level lower than  
9 a high school degree. Age and household income were only associated with MDD/GAD.

10 Regarding GP characteristics, GP gender and opportunity to work with mental health specialist was  
11 associated with the two outcomes. Size of practice population was associated only with MDD/GAD.

12 Most of the contextual variables studied were not associated with our study outcomes, except for  
13 material deprivation and the density of psychiatrists and psychologists which were significantly  
14 associated with MDD/GAD. To the contrary, work characteristics were almost all significantly  
15 associated with the two study outcomes, except job insecurity and autonomy which were not  
16 associated with alcohol abuse (Table 2).

**Table 2:** Association between common mental disorders (major depressive disorders (MDD), generalised anxiety disorders (GAD) and Alcohol abuse) and covariates, Héraclès study, France, 2014 (Chi-square test)

|                                           | MDD and GAD (n=648) |                      | Alcohol (n=196) |                      |
|-------------------------------------------|---------------------|----------------------|-----------------|----------------------|
|                                           | N (%)               | p<br>( $\chi^2$ -df) | N (%)           | p<br>( $\chi^2$ -df) |
| <b>Work Characteristics</b>               |                     |                      |                 |                      |
| Work intensity                            |                     | <0.01                |                 | 0.01                 |
| High                                      | 232 (52.8)          | (111.1 - 1)          | 58 (13.3)       | (7.5 - 1)            |
| Low                                       | 416 (26.2)          |                      | 138 (8.7)       |                      |
| Emotional demands                         |                     | <0.01                |                 | <0.01                |
| High                                      | 262 (54.9)          | (149.8 - 1)          | 73 (15.3)       | (21.8 - 1)           |
| Low                                       | 386 (24.9)          |                      | 123 (7.9)       |                      |
| Autonomy                                  |                     | <0.01                |                 | 0.48                 |
| High                                      | 158 (26.4)          | (11.6 - 1)           | 53 (8.9)        | (0.6 - 1)            |
| Low                                       | 490 (34.3)          |                      | 143 (10.0)      |                      |
| Conflict in values                        |                     | <0.01                |                 | <0.01                |
| High                                      | 335 (48.8)          | (134.4 - 1)          | 90 (13.1)       | (13.5 - 1)           |
| Low                                       | 313 (23.3)          |                      | 106 (7.9)       |                      |
| Social relations at work                  |                     | <0,01                |                 | 0,03                 |
| High                                      | 103 (15.0)          | (137.2 - 1)          | 52 (7.6)        | (4.9 - 1)            |
| Low                                       | 545 (40.7)          |                      | 144 (10.8)      |                      |
| Job insecurity                            |                     | <0,01                |                 | 0,14                 |
| High                                      | 242 (42.8)          | (41.8 - 1)           | 64 (11.3)       | (2.2 - 1)            |
| Low                                       | 406 (27.8)          |                      | 132 (9.0)       |                      |
| <b>Covariates</b>                         |                     |                      |                 |                      |
| <b>Patient Characteristics</b>            |                     |                      |                 |                      |
| Age group                                 |                     | 0,03                 |                 | 0,24                 |
| [18-35]                                   | 172 (28.8)          | (7.1 - 2)            | 48 (8.0)        | (2.8 - 2)            |
| [36-50]                                   | 306 (35.1)          |                      | 87 (10.0)       |                      |
| [51-65]                                   | 169 (30.6)          |                      | 60 (10.9)       |                      |
| Gender                                    |                     | <0,01                |                 | <0,01                |
| Male                                      | 266 (28.3)          | (10.5 - 1)           | 140 (14.9)      | (53.7 - 1)           |
| Female                                    | 382 (35.2)          |                      | 56 (5.2)        |                      |
| Occupational grade                        |                     | 0.32                 |                 | <0.01                |
| Blue collar                               | 79 (28.9)           | (2.3 - 2)            | 53 (19.4)       | (37.8 - 2)           |
| Pink collar                               | 386 (32.6)          |                      | 86 (7.3)        |                      |
| White collar                              | 152 (29.6)          |                      | 50 (9.7)        |                      |
| Educational level                         |                     | 0.13                 |                 | <0.01                |
| < High school degree                      | 266 (34.1)          | (2.3 - 1)            | 98 (12.6)       | (11.7 - 1)           |
| ≥ High school degree                      | 381 (30.8)          |                      | 97 (7.8)        |                      |
| Family status                             |                     | 0.01                 |                 | <0.01                |
| Lives alone                               | 471 (30.5)          | (6.3 - 1)            | 63 (13.1)       | (7.9 - 1)            |
| Lives with a partner or parents           | 177 (36.8)          |                      | 133 (8.6)       |                      |
| Household income (in €)                   |                     | 0.03                 |                 | 0.30                 |
| [0-3.000]                                 | 184 (37.5)          | (4.8 - 1)            | 53 (10.8)       | (1.1- 1)             |
| 3.000 +                                   | 353 (31.7)          |                      | 100 (9.0)       |                      |
| Company size                              |                     | 0.03                 |                 | <0.01                |
| 1 to 5                                    | 108 (29.9)          | (9.1 - 3)            | 51 (14.1)       | (16.5 - 3)           |
| 6 to 25                                   | 183 (37.3)          |                      | 53 (10.8)       |                      |
| 26 to 250                                 | 138 (32.9)          |                      | 43 (10.2)       |                      |
| 250 +                                     | 203 (29.5)          |                      | 45 (6.6)        |                      |
| Previous mental health problems/disorders |                     | <0.01                |                 | <0.01                |
| Yes                                       | 108 (57.1)          | (57.1 - 1)           | 30 (15.9)       | (16.5 - 1)           |
| No                                        | 516 (29.8)          |                      | 150 (8.6)       |                      |
| Past somatic problems                     |                     | 0.82                 |                 | 0.84                 |
| Yes                                       | 185 (33.1)          | (0.05 - 1)           | 53 (9.5)        | (0.04- 1)            |
| No                                        | 445 (32.4)          |                      | 136 (9.9)       |                      |

p: Chi-square test  
df: degree of freedom

1 **Table 2: (continued)**

|                                                         | MDD and GAD (n=648) |                      | Alcohol (n=196) |                      |
|---------------------------------------------------------|---------------------|----------------------|-----------------|----------------------|
|                                                         | N (%)               | p<br>( $\chi^2$ -df) | N (%)           | p<br>( $\chi^2$ -df) |
| <b>Purpose of consultation with GP</b>                  |                     |                      |                 |                      |
| Somatic                                                 |                     | <0,01                |                 | 0,04                 |
| Yes                                                     | 335 (25,2)          | (81.5 - 1)           | 115 (8,6)       | (4.4 - 1)            |
| No                                                      | 313 (45)            |                      | 81 (11,6)       |                      |
| Psychological                                           |                     | <0,01                |                 | <0,01                |
| Yes                                                     | 312 (73,4)          | (422.3 - 1)          | 61 (14,4)       | (12.8 - 1)           |
| No                                                      | 336 (21)            |                      | 135 (8,4)       |                      |
| Chronic disease management                              |                     | <0,01                |                 | <0,01                |
| Yes                                                     | 75 (24)             | (10.5 - 1)           | 46 (14,7)       | (10.0 - 1)           |
| No                                                      | 573 (33,4)          |                      | 150 (8,8)       |                      |
| Past unemployment                                       |                     | 0,57                 |                 | <0,01                |
| Yes                                                     | 202 (33)            | (0.33 - 1)           | 80 (13,1)       | (11.0 - 1)           |
| No                                                      | 446 (31,5)          |                      | 116 (8,2)       |                      |
| Job instability                                         |                     | <0,01                |                 | <0,01                |
| Yes                                                     | 229 (43,9)          | (47.0 - 1)           | 70 (13,4)       | (12.0 - 1)           |
| No                                                      | 400 (27,5)          |                      | 118 (11,1)      |                      |
| <b>GPs Characteristics</b>                              |                     |                      |                 |                      |
| GP's gender                                             |                     | <0,01                |                 | <0,01                |
| Male                                                    | 375 (27,5)          | (37.8 - 1)           | 152 (11,1)      | (9.9 - 1)            |
| Female                                                  | 273 (41,2)          |                      | 44 (6,6)        |                      |
| GP's age                                                |                     | 0,13                 |                 | 0,14                 |
| [18-39]                                                 | 72 (37,1)           | (5.7 - 3)            | 18 (9,3)        | (5.5 - 3)            |
| [40-49]                                                 | 190 (30,4)          |                      | 49 (7,8)        |                      |
| [50-59]                                                 | 254 (30,5)          |                      | 95 (11,4)       |                      |
| 60 +                                                    | 132 (35,2)          |                      | 34 (9,1)        |                      |
| Size of practice population                             |                     | <0,01                |                 | 0,06                 |
| 0-500                                                   | 79 (37,4)           | (14.7 - 3)           | 18 (8,5)        | (7.4 - 3)            |
| 5000 - 1000                                             | 295 (29,7)          |                      | 82 (8,3)        |                      |
| 1000- 1500                                              | 136 (31,4)          |                      | 47 (10,9)       |                      |
| 1500+                                                   | 104 (41,1)          |                      | 34 (13,4)       |                      |
| Comfort with mental health problems                     |                     | 0,21                 |                 | 0,48                 |
| High                                                    | 500 (31,3)          | (1.6 - 1)            | 155 (9,7)       | (0.5 - 1)            |
| Low                                                     | 118 (34,9)          |                      | 28 (8,3)        |                      |
| High opportunity to work with mental health specialists |                     | <0,01                |                 | 0,05                 |
| High                                                    | 345 (36,7)          | (18.2 - 1)           | 103 (9,9)       | (3.7 - 1)            |
| Low                                                     | 286 (27,6)          |                      | 86 (9,1)        |                      |
| <b>Contextual characteristics</b>                       |                     |                      |                 |                      |
| Social deprivation                                      |                     | 0,32                 |                 | 0,87                 |
| High                                                    | 167 (30,2)          | (1.0 - 1)            | 52 (9,4)        | (0.03 - 1)           |
| Low                                                     | 481 (32,6)          |                      | 144 (9,8)       |                      |
| Material deprivation                                    |                     | <0,01                |                 | 0,74                 |
| High                                                    | 306 (36)            | (10.4 - 1)           | 85 (10)         | (0.1 - 1)            |
| Low                                                     | 342 (29,1)          |                      | 111 (9,4)       |                      |
| Density of psychiatrist                                 |                     | 0,02                 |                 | 0,97                 |
| High                                                    | 522 (33,3)          | (5.1 - 1)            | 45 (9,8)        | (0.01 - 1)           |
| Low                                                     | 126 (27,5)          |                      | 151 (9,6)       |                      |
| Density of psychologist                                 |                     | 0,05                 |                 | 0,10                 |
| High                                                    | 515 (33,1)          | (4.0 - 1)            | 36 (7,6)        | (2.7 - 1)            |
| Low                                                     | 133 (28,1)          |                      | 160 (10,3)      |                      |
| Density of GP                                           |                     | 0,06                 |                 | 0,88                 |
| High                                                    | 505 (33,1)          | (3.6 - 1)            | 50 (10)         | (0.02 - 1)           |
| Low                                                     | 143 (28,4)          |                      | 146 (9,6)       |                      |

2 *p*: Chi-square test  
3 *df*: degree of freedom  
4  
5

1  
2 1 Multivariable analysis (Table 3)

3  
4 2 All occupational factors were associated with our two study outcomes in unadjusted analyses. In  
5  
6 3 adjusted analyses, patients reporting high levels of work intensity (RR=1.16 [1.06 - 1.27]; p<0.01)  
7  
8 4 (absolute risk = 52.8%) and emotional demands (RR=1.24 [1.13 - 1.35]; p<0.01) (absolute risk =  
9  
10 5 54.9%) had a higher risk of MDD/GAD, whereas patients with high social relations at work had a  
11  
12 6 lower risk to have MDD/GAD (RR=0.78 [0.70 – 0.87]; p<0.01) (absolute risk = 15.0%).

13  
14 7 Regarding alcohol abuse, social relations at work were associated with a higher risk (RR=1.25 [1.0 -  
15  
16 8 1.53]; p=0.03) (absolute risk = 7.6%) and higher autonomy was protective (RR=0.82 [0.67 – 0.99];  
17  
18 9 p=0.05) (absolute risk = 8.9%) (Table 3). A sensitivity analyses by occupational group showed a  
19  
20 10 higher risk of alcohol abuse for white collar workers in case of high social relations at work (RR=1.89  
21  
22 11 [1.21 – 2.9]).

23  
24 12 Associations between covariates and the study outcomes are presented in supplementary material  
25  
26 13 (Appendix 3).



1  
2  
3  
4  
5  
6  
7  
8  
9  
10  
11  
12  
13  
14  
15  
16  
17  
18  
19  
20  
21  
22  
23  
24  
25  
26  
27  
28  
29  
30  
31  
32  
33  
34  
35  
36  
37  
38  
39  
40  
41  
42  
43  
44  
45  
46  
47

**Table 3:** Work-related factors and major depressive disorder (MDD), generalized anxiety disorders (GAD) and alcohol abuse, Héraclès study, France, 2014. Multilevel Poisson regression models

|                                 | MDD/GAD (n=1782) |                      |                 |                 |                      |                 | Alcohol (n=1776) |                      |                 |                 |                      |             |
|---------------------------------|------------------|----------------------|-----------------|-----------------|----------------------|-----------------|------------------|----------------------|-----------------|-----------------|----------------------|-------------|
|                                 | Unadjusted       |                      |                 | Adjusted        |                      |                 | Unadjusted       |                      |                 | Adjusted        |                      |             |
|                                 | RR <sup>1</sup>  | CI 95%               | P               | RR <sup>2</sup> | CI 95%               | P               | RR <sup>1</sup>  | CI 95%               | P               | RR <sup>3</sup> | CI 95%               | P           |
| <b>Work intensity</b>           | <b>1.46</b>      | <b>[1.35 - 1.57]</b> | <b>&lt;0.01</b> | <b>1.16</b>     | <b>[1.06 - 1.27]</b> | <b>&lt;0.01</b> | <b>1.31</b>      | <b>[1.14 - 1.50]</b> | <b>&lt;0.01</b> | 1.16            | [0.97 - 1.38]        | 0.10        |
| <b>Emotional demands</b>        | <b>1.53</b>      | <b>[1.43 - 1.64]</b> | <b>&lt;0.01</b> | <b>1.24</b>     | <b>[1.13 - 1.35]</b> | <b>&lt;0.01</b> | <b>1.40</b>      | <b>[1.23 - 1.59]</b> | <b>&lt;0.01</b> | 1.16            | [0.97 - 1.38]        | 0.10        |
| <b>Autonomy</b>                 | <b>0.68</b>      | <b>[0.63 - 0.73]</b> | <b>&lt;0.01</b> | 0.94            | [0.85 - 1.04]        | 0.26            | <b>0.72</b>      | <b>[0.63 - 0.83]</b> | <b>&lt;0.01</b> | <b>0.82</b>     | <b>[0.67 - 0.99]</b> | <b>0.05</b> |
| <b>Conflict in values</b>       | <b>1.45</b>      | <b>[1.35 - 1.56]</b> | <b>&lt;0.01</b> | 1.06            | [0.96 - 1.17]        | 0.26            | <b>1.30</b>      | <b>[1.14 - 1.49]</b> | <b>&lt;0.01</b> | 1.16            | [0.96 - 1.40]        | 0.13        |
| <b>Social relations at work</b> | <b>0.61</b>      | <b>[0.56 - 0.66]</b> | <b>&lt;0.01</b> | <b>0.78</b>     | <b>[0.70 - 0.87]</b> | <b>&lt;0.01</b> | <b>0.83</b>      | <b>[0.72 - 0.96]</b> | <b>0.01</b>     | <b>1.25</b>     | <b>[1.01 - 1.53]</b> | <b>0.03</b> |
| <b>Job insecurity</b>           | <b>1.13</b>      | <b>[1.05 - 1.22]</b> | <b>&lt;0.01</b> | 1.03            | [0.95 - 1.11]        | 0.49            | <b>1.14</b>      | <b>[1.00 - 1.30]</b> | <b>0.05</b>     | 0.95            | [0.82 - 1.11]        | 0.52        |

RR: relative risk

<sup>1</sup> No adjustment: each occupational factor are studied one at the time

<sup>2</sup> Adjusted on: each occupational factors, age, gender, occupational grade, previous mental health problems/disorders, alcohol abuse, material deprivation and GP's gender

<sup>3</sup> Adjusted on: each occupational factors, age, gender, occupational grade, family status, company size, previous mental health problems/disorders, job instability, education level, past unemployment, GAD and MDD

For MDD/GAD model explained variance was 0.21 and 0.11 for Alcohol model

## 4 DISCUSSION

### 4.1 Main results

In our study conducted among a large sample of persons consulting a GP, we found that several work characteristics are associated with mental health. Unfavourable social relations at work are associated with a higher risk of MDD/GAD, but a lower risk of alcohol abuse. High work intensity and high emotional demands at work are associated with a higher risk of MDD/GAD. Finally, low autonomy at work is associated with a higher risk of alcohol abuse.

### 4.2 Comparison with literature

We confirm, for the first time in primary care, the association between common mental disorders and social relations at work which was reported in other studies. A cross sectional study conducted in Japan (using the K10 questionnaire to assess depression) reported a higher risk of depressive symptoms among workers who receive low social support at work (OR=3.8)<sup>53</sup>. A meta-analysis of 17 studies investigating depressive disorders<sup>54</sup> found that low social support at work is also associated with anxiety disorders, as had already been observed in a study conducted by Wang *et al.*<sup>55</sup> However, the causal direction of this association cannot be determined due to the cross-sectional design of our study. It is possible that low social relations at work increases the risk of depression or anxiety, as has been shown in different longitudinal studies.<sup>56</sup> Moreover, social relations and support (outside or at work) affect psychological health,<sup>57</sup> but it is also possible that individuals who are not depressed or experiencing anxiety disorders receive better social support.<sup>57</sup> Finally, the association between GAD/MDD and social relations at work could also be related to negative visions of social relations among persons who are depressed or anxious.<sup>58</sup> For alcohol abuse, an inverse association with social relations was observed: higher risk associated with high social relations at work, which is consistent with results of a cross sectional study conducted among Canadian workers.<sup>25</sup> It raises the possibility of festive alcohol consumption with colleagues in or outside work.<sup>59</sup> We performed

1 sensitivity analyses by occupational group to explore this result and found that white collar workers  
2 were most likely to report alcohol abuse in case of high social relations at work (RR=1.89 [1.21 –  
3 2.9]). Other studies have approached this subject by pointing out afterwork with colleagues.<sup>60</sup>

4 Work intensity, or high work time and intensity, is associated with depressive symptoms in the meta-  
5 analysis conducted by Theorell *et al* (10 studies).<sup>54</sup> The meta-analysis of longitudinal studies by  
6 Netterstrom *et al* highlights the adverse effects of high psychological demands on the occurrence of  
7 depressive disorders.<sup>56</sup> However, this association could also be due to distorted views of  
8 psychological demands among persons with depressive disorders.<sup>58</sup>

9 High emotional demands at work have previously been shown to predict depressive disorders  
10 among women in a population-based nested case-control study of 14,166 psychiatric patients  
11 conducted in Denmark (IRR=1.39)<sup>26</sup> or for GAD in a French prospective study (using the same  
12 diagnostic tool MINI) (RR=1.66 among workers with high emotional demand<sup>22</sup>). In our cross sectional  
13 study, the causal attribution is not possible, thus it is also possible that people with depression and/or  
14 anxiety have a different view towards those demands.<sup>58</sup>

15 Work autonomy appears related to alcohol abuse, as reported in an English prospective study:  
16 low decision latitude, which is a part of the autonomy axis in our study, is associated to higher risk of  
17 alcohol dependence within women.<sup>61</sup>

18 We did not confirm the association found earlier between CMD and high job insecurity or  
19 conflict in value.<sup>21 22 24</sup>

20 Overall, our study shows that work intensity and emotional demands are associated with GAD/MDD  
21 and social relations at work have a positive effect. For alcohol abuse, autonomy and social relations  
22 at work are negative risk factors.

### 23 4.3 Strengths and limitations of the study

24 Several limitations of our study should be acknowledged. First, our study was conducted in the Nord -  
25 Pas-de-Calais region, i.e. one of the poorest in France with a total of four millions inhabitants. During  
26 the first half of the 20<sup>th</sup> century, this region was highly industrialized and since the 1950s it has  
27 suffered from industrial decline as mines, as well as the textile and steel industries gradually closed.

1  
2  
3 1 Despite the growth of services and some specialized industries (car, rail and glass), levels of  
4  
5 2 education, unemployment (15%), poverty and health indicators (e.g. life expectancy) are  
6  
7 3 unfavourable. The Nord - Pas-de-Calais region has a low density of GPs (-11% than in France  
8  
9 4 overall) and other medical specialities (-24%).<sup>62</sup> Moreover, the study was conducted after the 2008  
10  
11 5 recession, which has been associated with an increase in the prevalence of common mental health  
12  
13 6 disorders worldwide.<sup>63 64</sup> This could lead to a high level of mental disorders. The prevalence of MDD,  
14  
15 7 GAD and alcohol abuse among patients consulting a GP is respectively 19.1%, 25.8% and 9.7%. This  
16  
17 8 is consistent with studies in primary care where the prevalence of CMDs ranges from 6% to 25% for  
18  
19 9 depression, 3% to 25% for anxiety and 2% to 11% for alcohol abuse.<sup>11 13 29-32</sup> Results should be  
20  
21 10 replicated in others areas. Second, a possible weakness is GPs' selective participation. GPs who  
22  
23 11 participated in the study could be especially interested in common mental disorders. This interest may  
24  
25 12 be related to the personal interest of the GP, but it could also be related to the GP's patients' rate of  
26  
27 13 common mental disorders. Therefore, it may cause a larger selection of patients with psychological  
28  
29 14 disorders. However, the study response rate is similar to previous studies among GPs<sup>30 65</sup> and  
30  
31 15 physicians who participated were representative of the region, thereby limiting possible bias. In  
32  
33 16 general practice, GPs' response rate is generally low<sup>66</sup>, and in order to favour an optimal response  
34  
35 17 rate, we tested the questionnaire to make it parsimonious, GPs were paid for their participation, and  
36  
37 18 GPs who were asked to participate were individually called. A random procedure to select patients  
38  
39 19 included in the study limited bias. Indeed, GPs were asked to include patients following an inclusion  
40  
41 20 schedule that was provided at the start of the study. This allowed us to include patients in different  
42  
43 21 time slots of the week. Moreover a non-respondent form had to be filled by participating GPs but we  
44  
45 22 suppose that the filling rate was low because only 41 GPs filled this form and declare that 495 patient  
46  
47 23 were not included. Characteristics of patients included and those not included did not differ in term of  
48  
49 24 age and gender. However it is important to note that compared to studies in work environment  
50  
51 25 settings, it is possible that patients included in this primary care setting have a different level of health  
52  
53 26 than other employees who do not consult their GP. The measurement of psychosocial work factors in  
54  
55 27 our study was based on an unpublished expert report based on the international literature, and  
56  
57 28 measurement of reliability in our sample was rather low for some axis ( $\omega=0.35$  for conflict in values,

1  
2  
3 1 0.50 for job insecurity and 0.66 for autonomy). These dimensions are only composed of 2 items, this  
4  
5 2 can explain partly the rather low reliability. However, the use of a validated questionnaire could have  
6  
7 3 allowed for a better comparison with the existing literature and better psychometric quality.  
8  
9 4 We were able to take into account many covariates (characterizing individuals, GPs and patients'  
10  
11 5 context), but some relevant variables were not included, such as participants' prior history of mental  
12  
13 6 health problems, social support outside of work, or life events.  
14  
15 7 Despite these limitations, the results of this study are of interest because it identifies occupational  
16  
17 8 factors related to CMD (MDD/GAD and alcohol abuse) among working adults in primary care with a  
18  
19 9 standardized diagnostic tool (MINI) in a large sample (n=2,027).<sup>37</sup> The primary care sample used  
20  
21 10 allows the inclusion of a panel of workers in the labour force including independent workers, workers  
22  
23 11 in small companies or workers who don't have an occupational physician which is not the case in  
24  
25 12 most of studies in occupational setting. Indeed, an international study including 49 countries shows  
26  
27 13 that the average occupational health services coverage of workers was 24.8% with a larger gap  
28  
29 14 among workers in small-scale enterprises, the self-employed, agriculture, and the informal sector.<sup>67</sup>  
30  
31 15 Moreover, the present study confirms the increased risk of anxiety and depression associated with  
32  
33 16 work intensity, social relations at work and emotional demands as well as the association between  
34  
35 17 reduced autonomy and alcohol abuse in a primary care setting. Furthermore, we could demonstrate a  
36  
37 18 negative association between social relations at work and alcohol abuse.<sup>8 22 26 61</sup>

#### 19 4.4 Conclusion

20 Our study is one of the first to investigate simultaneously well-known occupational risk factors such as  
21  
22 21 job strain and effort-reward imbalance and new occupational factors described in recent literature.  
23  
24 22 Our results emphasise the importance of social relations at work and different occupational factors  
25  
26 23 that are associated with MDD, GAD and alcohol abuse. These results could be a starting point for the  
27  
28 24 GPs to apprehend these factors with their patients and to communicate with occupational physicians  
29  
30 25 in order to prevent the onset of CMD.  
31  
32  
33  
34  
35  
36  
37  
38  
39  
40  
41  
42  
43  
44  
45  
46  
47  
48  
49  
50  
51  
52  
53  
54  
55  
56  
57  
58  
59  
60

## 1           2           3           4           5           6           7           8           9           10           11           12           13           14           15           16           17           18           19           20           21           22           23           24           25           26           27           28           29           30           31           32           33           34           35           36           37           38           39           40           41           42           43           44           45           46           47           48           49           50           51           52           53           54           55           56           57           58           59           60

### 1           **ACKNOWLEDGMENT**

2           The authors thank all the participating GPs of the Nord – Pas-de-Calais region and their patients who  
3           participated to the Héraclès study. We thank the department of General practice of Lille’s university  
4           and the regional union of health professional of GP’s (URPS-ML) of the Nord – Pas-de-Calais region  
5           for their involvement in the GP recruitment phase. We also want to thank the Héraclès study scientific  
6           committee members who contributed to the brainstorming and the set-up of this survey  
7

### 8           **CONTRIBUTORS**

9           Study concept and design: MR, NY, MM, AL, TB, LP. Data analysis and collection: MR, LFC, MM, LP.  
10          Drafting of the manuscript: MR. Critical revision of the manuscript: NY, MM, AL. All authors have  
11          approved the final manuscript.  
12

### 13          **COMPETING INTERESTS**

14          All authors declare that they do not have any competing interests and declare independence from the  
15          funders.  
16

### 17          **FUNDING**

18          This work was supported by the Nord – Pas-de-Calais regional health agency (ARS) and the Ile-de-  
19          France region – DIM Gestes (Mathieu Rivière’s PhD thesis).  
20

### 21          **DATA SHARING STATEMENT**

22          No additional data are available

## 5 REFERENCES

1. Wagenaar AF, Kompier MA, Houtman IL, et al. Employment contracts and health selection: unhealthy employees out and healthy employees in? *J Occup Environ Med* 2012;54(10):1192-200. doi: 10.1097/JOM.0b013e3182717633 [published Online First: 2012/09/22]
2. McLellan RK. Work, Health, And Worker Well-Being: Roles And Opportunities For Employers. *Health Aff (Millwood)* 2017;36(2):206-13. doi: 10.1377/hlthaff.2016.1150 [published Online First: 2017/02/09]
3. Hussey L, Turner S, Thorley K, et al. Work-related ill health in general practice, as reported to a UK-wide surveillance scheme. *Br J Gen Pract* 2008;58(554):637-40. doi: 10.3399/bjgp08X330753 [published Online First: 2008/09/20]
4. Whiteford HA, Degenhardt L, Rehm J, et al. Global burden of disease attributable to mental and substance use disorders: findings from the Global Burden of Disease Study 2010. *Lancet (London, England)* 2013;382(9904):1575-86. doi: 10.1016/s0140-6736(13)61611-6 [published Online First: 2013/09/03]
5. NHI. Description des populations du regime general en arret de travail de 2 a 4 mois 2004 [Available from: [http://fulltext.bdsp.ehesp.fr/Cnamts/Etudes/2004/DESCRIPTION\\_ARRETS\\_TRAVAIL\\_2\\_4\\_MOIS\\_2004.pdf](http://fulltext.bdsp.ehesp.fr/Cnamts/Etudes/2004/DESCRIPTION_ARRETS_TRAVAIL_2_4_MOIS_2004.pdf)].
6. Steel Z, Marnane C, Iranpour C, et al. The global prevalence of common mental disorders: a systematic review and meta-analysis 1980-2013. *Int J Epidemiol* 2014;43(2):476-93. doi: 10.1093/ije/dyu038 [published Online First: 2014/03/22]
7. Wittchen HU, Jacobi F, Rehm J, et al. The size and burden of mental disorders and other disorders of the brain in Europe 2010. *European neuropsychopharmacology : the journal of the European College of Neuropsychopharmacology* 2011;21(9):655-79. doi: 10.1016/j.euroneuro.2011.07.018 [published Online First: 2011/09/08]
8. Harvey SB, Modini M, Joyce S, et al. Can work make you mentally ill? A systematic meta-review of work-related risk factors for common mental health problems. *Occup Environ Med* 2017;74(4):301-10. doi: 10.1136/oemed-2016-104015 [published Online First: 2017/01/22]
9. Reme SE, Grasdal AL, Lovvik C, et al. Work-focused cognitive-behavioural therapy and individual job support to increase work participation in common mental disorders: a randomised controlled multicentre trial. *Occup Environ Med* 2015;72(10):745-52. doi: 10.1136/oemed-2014-102700 [published Online First: 2015/08/08]
10. Stewart WF, Ricci JA, Chee E, et al. Cost of lost productive work time among US workers with depression. *JAMA* 2003;289(23):3135-44. doi: 10.1001/jama.289.23.3135 [published Online First: 2003/06/19]
11. Milanovic SM, Erjavec K, Poljicanin T, et al. Prevalence of depression symptoms and associated socio-demographic factors in primary health care patients. *Psychiatr Danub* 2015;27(1):31-7. [published Online First: 2015/03/10]
12. Freeman A, Tyrovolas S, Koyanagi A, et al. The role of socio-economic status in depression: results from the COURAGE (aging survey in Europe). *BMC Public Health* 2016;16(1):1098. doi: 10.1186/s12889-016-3638-0 [published Online First: 2016/10/21]
13. Ibanez G, Son S, Chastang J, et al. Mental Health Disorders in General Practice in France: A Cross-Sectional Survey. *Transl Biomed* 2016;7:4. doi: 10.2167/2172-0479.100096
14. Lacerda-Pinheiro SF, Pinheiro Junior RF, Pereira de Lima MA, et al. Are there depression and anxiety genetic markers and mutations? A systematic review. *J Affect Disord* 2014;168:387-98. doi: 10.1016/j.jad.2014.07.016 [published Online First: 2014/08/12]
15. Abbas RA, Hammam RA, El-Gohary SS, et al. Screening for common mental disorders and substance abuse among temporary hired cleaners in Egyptian Governmental Hospitals, Zagazig

- 1  
2  
3 1 City, Sharqia Governorate. *The international journal of occupational and environmental*  
4 2 *medicine* 2013;4(1):13-26. [published Online First: 2013/01/03]
- 5 3 16. Karasek R. Job demands, job decision latitude, and mental strain : implication for job redesign.  
6 4 *Adm Sci Q* 1979 24 285-309.
- 7 5 17. Siegrist J. Adverse health effects of high-effort/low-reward conditions. *J Occup Health Psychol*  
8 6 1996;1(1):27-41. [published Online First: 1996/01/01]
- 9 7 18. Elovainio M, Kivimaki M, Vahtera J. Organizational justice: evidence of a new psychosocial  
10 8 predictor of health. *Am J Public Health* 2002;92(1):105-8. [published Online First: 2002/01/05]
- 11 9 19. Rugulies R, Aust B, Madsen IE. Effort-reward imbalance at work and risk of depressive disorders.  
12 10 A systematic review and meta-analysis of prospective cohort studies. *Scand J Work Environ*  
13 11 *Health* 2017;43(4):294-306. doi: 10.5271/sjweh.3632 [published Online First: 2017/03/18]
- 14 12 20. Stansfeld S, Candy B. Psychosocial work environment and mental health--a meta-analytic review.  
15 13 *Scand J Work Environ Health* 2006;32(6):443-62. [published Online First: 2006/12/19]
- 16 14 21. Murcia M, Chastang JF, Niedhammer I. Psychosocial work factors, major depressive and  
17 15 generalised anxiety disorders: results from the French national SIP study. *J Affect Disord*  
18 16 2013;146(3):319-27. doi: 10.1016/j.jad.2012.09.014 [published Online First: 2012/10/13]
- 19 17 22. Niedhammer I, Malard L, Chastang JF. Occupational factors and subsequent major depressive and  
20 18 generalized anxiety disorders in the prospective French national SIP study. *BMC Public Health*  
21 19 2015;15:200. doi: 10.1186/s12889-015-1559-y [published Online First: 2015/04/18]
- 22 20 23. Gollac M. Mesurer les facteurs psychosociaux de risque au travail pour les maîtriser. 2010  
23 21 [Available from: [http://travail-](http://travail-emploi.gouv.fr/IMG/pdf/rapport_SRPST_definitif_rectifie_11_05_10.pdf)  
24 22 [emploi.gouv.fr/IMG/pdf/rapport\\_SRPST\\_definitif\\_rectifie\\_11\\_05\\_10.pdf](http://travail-emploi.gouv.fr/IMG/pdf/rapport_SRPST_definitif_rectifie_11_05_10.pdf).]
- 25 23 24. Schutte S, Chastang JF, Parent-Thirion A, et al. Psychosocial work exposures among European  
26 24 employees: explanations for occupational inequalities in mental health. *Journal of public health*  
27 25 *(Oxford, England)* 2015;37(3):373-88. doi: 10.1093/pubmed/fdv044 [published Online First:  
28 26 2015/04/26]
- 29 27 25. Marchand A, Parent-Lamarche A, Blanc ME. Work and high-risk alcohol consumption in the  
30 28 Canadian workforce. *International journal of environmental research and public health*  
31 29 2011;8(7):2692-705. doi: 10.3390/ijerph8072692 [published Online First: 2011/08/17]
- 32 30 26. Wieclaw J, Agerbo E, Mortensen PB, et al. Psychosocial working conditions and the risk of  
33 31 depression and anxiety disorders in the Danish workforce. *BMC Public Health* 2008;8:280. doi:  
34 32 10.1186/1471-2458-8-280 [published Online First: 2008/08/09]
- 35 33 27. Gentner S. Industry 4.0: Reality, Future or just Science Fiction? How to Convince Today's  
36 34 Management to Invest in Tomorrow's Future! Successful Strategies for Industry 4.0 and  
37 35 Manufacturing IT. *Chimia* 2016;70(9):628-33. doi: 10.2533/chimia.2016.628 [published  
38 36 Online First: 2016/09/21]
- 39 37 28. Malard L, Chastang JF, Niedhammer I. Changes in psychosocial work factors in the French  
40 38 working population between 2006 and 2010. *Int Arch Occup Environ Health* 2015;88(2):235-  
41 39 46. doi: 10.1007/s00420-014-0953-6 [published Online First: 2014/06/26]
- 42 40 29. Ansseau M, Dierick M, Buntinx F, et al. High prevalence of mental disorders in primary care. *J*  
43 41 *Affect Disord* 2004;78(1):49-55. doi: S0165032702002197 [pii] [published Online First:  
44 42 2003/12/16]
- 45 43 30. Toft T, Fink P, Oernboel E, et al. Mental disorders in primary care: prevalence and co-morbidity  
46 44 among disorders. results from the functional illness in primary care (FIP) study. *Psychol Med*  
47 45 2005;35(8):1175-84. [published Online First: 2005/08/25]
- 48 46 31. Alkhadhari S, Alsabbri AO, Mohammad IH, et al. Prevalence of psychiatric morbidity in the  
49 47 primary health clinic attendees in Kuwait. *J Affect Disord* 2016;195:15-20. doi:  
50 48 10.1016/j.jad.2016.01.037 [published Online First: 2016/02/08]
- 51 49 32. Norton J, de Roquefeuil G, David M, et al. [Prevalence of psychiatric disorders in French general  
52 50 practice using the patient health questionnaire: comparison with GP case-recognition and  
53 51  
54 52  
55 53  
56 54  
57 55  
58 56  
59 57  
60 58



- 1  
2  
3 1 psychotropic medication prescription]. *Encephale* 2009;35(6):560-9. doi:  
4 2 10.1016/j.encep.2008.06.018  
5 3 S0013-7006(08)00267-4 [pii] [published Online First: 2009/12/17]  
6 4 33. Beckley A, Lees B, Collington S, et al. Work-related health advice in primary care. *Occupational*  
7 5 *medicine* 2011;61(7):498-502. doi: 10.1093/occmed/kqr119  
8 6 kqr119 [pii] [published Online First: 2011/08/26]  
9 7 34. de Kock CA, Lucassen PL, Spinnewijn L, et al. How do Dutch GPs address work-related  
10 8 problems? A focus group study. *Eur J Gen Pract* 2016;1-8. doi:  
11 9 10.1080/13814788.2016.1177507 [published Online First: 2016/06/02]  
12 10 35. Riviere M, Plancke L, Leroyer A, et al. Prevalence of work-related common psychiatric disorders  
13 11 in primary care: The French Heracles study. *Psychiatry Res* 2017 doi:  
14 12 10.1016/j.psychres.2017.09.008 [published Online First: 2017/09/19]  
15 13 36. Flahault A, Blanchon T, Dorleans Y, et al. Virtual surveillance of communicable diseases: a 20-  
16 14 year experience in France. *Stat Methods Med Res* 2006;15(5):413-21. [published Online First:  
17 15 2006/11/09]  
18 16 37. Sheehan DV, Lecrubier Y, Sheehan KH, et al. The Mini-International Neuropsychiatric Interview  
19 17 (M.I.N.I.): the development and validation of a structured diagnostic psychiatric interview for  
20 18 DSM-IV and ICD-10. *J Clin Psychiatry* 1998;59 Suppl 20:22-33;quiz 34-57. [published Online  
21 19 First: 1999/01/09]  
22 20 38. Lecrubier Y, Sheehan DV, Weiller E, et al. The Mini International Neuropsychiatric Interview  
23 21 (MINI). A short diagnostic structured interview: reliability and validity according to the CIDI.  
24 22 *European Psychiatry* 1997;12(5):224-31.  
25 23 39. Moorman R. Relationship between organizational justice and organizational citizenship behaviors:  
26 24 do fairness perception influence employee citizenship? *J Appl Psychol* 1991;76:845-55.  
27 25 40. Kristensen TS, Hannerz H, Hogh A, et al. The Copenhagen Psychosocial Questionnaire--a tool for  
28 26 the assessment and improvement of the psychosocial work environment. *Scand J Work Environ*  
29 27 *Health* 2005;31(6):438-49. [published Online First: 2006/01/24]  
30 28 41. Dallner M, Elo A-L, Gamberale F, et al. Validation of the general Nordic questionnaire  
31 29 (QPSNordic) for psychological and social factors at work (No. Nord 2000:12). In: Ministers  
32 30 NCo, ed. Copenhagen, 2000.  
33 31 42. Hansez I. The Working Conditions and Control Questionnaire (WOCCQ): Towards a structural  
34 32 model of psychological stress. *European Review of Applied Psychology* 2008;58(253 - 262)  
35 33 43. Dunn TJ, Baguley T, Brunnsden V. From alpha to omega: a practical solution to the pervasive  
36 34 problem of internal consistency estimation. *British journal of psychology (London, England : 1953)*  
37 35 2014;105(3):399-412. doi: 10.1111/bjop.12046 [published Online First: 2014/05/23]  
38 36 44. INSEE. Nomenclature des Professions et Catégories Socioprofessionnelles - PCS 2003 [Available  
39 37 from: <https://www.insee.fr/fr/information/2400059>.  
40 38 45. Min KB, Park SG, Hwang SH, et al. Precarious employment and the risk of suicidal ideation and  
41 39 suicide attempts. *Preventive medicine* 2015;71:72-6. doi: 10.1016/j.ypmed.2014.12.017  
42 40 [published Online First: 2014/12/24]  
43 41 46. Fleury MJ, Bamvita JM, Farand L, et al. Variables associated with general practitioners taking on  
44 42 patients with common mental disorders. *Mental health in family medicine* 2008;5(3):149-60.  
45 43 [published Online First: 2008/09/01]  
46 44 47. Pampalon R, Hamel D, Gamache P, et al. Validation of a deprivation index for public health: a  
47 45 complex exercise illustrated by the Quebec index. *Chronic diseases and injuries in Canada*  
48 46 2014;34(1):12-22. [published Online First: 2014/03/13]  
49 47 48. Moreno-Betancur M, Latouche A, Menvielle G, et al. Relative index of inequality and slope index  
50 48 of inequality: a structured regression framework for estimation. *Epidemiology (Cambridge, Mass)*  
51 49 2015;26(4):518-27. doi: 10.1097/ede.0000000000000311 [published Online First:  
52 50 2015/05/23]

- 1  
2  
3 1 49. Zou G. A modified poisson regression approach to prospective studies with binary data. *Am J Epidemiol* 2004;159(7):702-6. [published Online First: 2004/03/23]
- 4 2  
5 3 50. Knol MJ, Le Cessie S, Algra A, et al. Overestimation of risk ratios by odds ratios in trials and cohort studies: alternatives to logistic regression. *CMAJ : Canadian Medical Association journal = journal de l'Association medicale canadienne* 2012;184(8):895-9. doi: 10.1503/cmaj.101715 [published Online First: 2011/12/14]
- 6 4  
7 5  
8 6  
9 7 51. Team RDC. R: A language and environment for statistical computing Vienna, Austria: R Foundation for Statistical Computing; 2008 [Available from: <http://www.R-project.org>.]
- 10 8  
11 9 52. Bates D, Maechler M, Bolker B, et al. Fitting Linear Mixed-Effects Models Using lme4. *Journal of Statistical Software* 2015;67(1):1--48. doi: 10.18637/jss.v067.i01
- 12 10  
13 11 53. Honda A, Date Y, Abe Y, et al. Work-related Stress, Caregiver Role, and Depressive Symptoms among Japanese Workers. *Saf Health Work* 2014;5(1):7-12. doi: 10.1016/j.shaw.2013.11.002 [published Online First: 2014/06/17]
- 14 12  
15 13  
16 14 54. Theorell T, Hammarström A, Aronsson G, et al. A systematic review including meta-analysis of work environment and depressive symptoms. *BMC Public Health* 2015;15 doi: 10.1186/s12889-015-1954-4
- 17 15  
18 16  
19 17 55. Wang JL, Lesage A, Schmitz N, et al. The relationship between work stress and mental disorders in men and women: findings from a population-based study. *J Epidemiol Community Health* 2008;62(1):42-7. doi: 10.1136/jech.2006.050591 [published Online First: 2007/12/15]
- 20 18  
21 19  
22 20 56. Netterstrom B, Conrad N, Bech P, et al. The relation between work-related psychosocial factors and the development of depression. *Epidemiologic reviews* 2008;30:118-32. doi: 10.1093/epirev/mxn004 [published Online First: 2008/07/01]
- 23 21  
24 22  
25 23 57. Melchior M, Berkman LF, Niedhammer I, et al. Social relations and self-reported health: a prospective analysis of the French Gazel cohort. *Social science & medicine (1982)* 2003;56(8):1817-30. [published Online First: 2003/03/18]
- 26 24  
27 25  
28 26 58. Beck AT, Brown GK, Steer RA, et al. Psychometric properties of the Beck Self-Esteem Scales. *Behaviour research and therapy* 2001;39(1):115-24. [published Online First: 2000/12/28]
- 29 27  
30 28 59. Nordaune K, Skarpaas LS, Sagvaag H, et al. Who initiates and organises situations for work-related alcohol use? The WIRUS culture study. *Scandinavian journal of public health* 2017;1403494817704109. doi: 10.1177/1403494817704109 [published Online First: 2017/07/02]
- 31 29  
32 30  
33 31  
34 32 60. Hagihara A, Tarumi K, Nobutomo K. Work stressors, drinking with colleagues after work, and job satisfaction among white-collar workers in Japan. *Substance use & misuse* 2000;35(5):737-56. [published Online First: 2000/05/12]
- 35 33  
36 34  
37 35 61. Head J, Stansfeld SA, Siegrist J. The psychosocial work environment and alcohol dependence: a prospective study. *Occup Environ Med* 2004;61(3):219-24. [published Online First: 2004/02/27]
- 38 36  
39 37  
40 38 62. Plancke L, Bavdek R. Les disparités régionales en santé mentale et en psychiatrie. La situation du Nord Pas-de-Calais en France métropolitaine, Lille, F2RSM. 2013. <http://www.santementale5962.com/ressources-et-outils/les-editions-de-la-f2rsm/article/disparites-regionales-en-sante>.
- 41 39  
42 40  
43 41  
44 42 63. Katikireddi SV, Niedzwiedz CL, Popham F. Trends in population mental health before and after the 2008 recession: a repeat cross-sectional analysis of the 1991-2010 Health Surveys of England. *BMJ Open* 2012;2(5) doi: 10.1136/bmjopen-2012-001790 [published Online First: 2012/10/19]
- 45 43  
46 44  
47 45  
48 46 64. Lee S, Guo WJ, Tsang A, et al. Evidence for the 2008 economic crisis exacerbating depression in Hong Kong. *J Affect Disord* 2010;126(1-2):125-33. doi: 10.1016/j.jad.2010.03.007 [published Online First: 2010/04/13]
- 49 47  
50 48  
51 49 65. Goldenberg MG, Skeldon SC, Nayan M, et al. Prostate-specific antigen testing for prostate cancer screening: A national survey of Canadian primary care physicians' opinions and practices.
- 52 49  
53 50  
54 51  
55 52  
56 53  
57 54  
58 55  
59 56  
60 57

- 1  
2  
3 1 *Canadian Urological Association journal = Journal de l'Association des urologues du Canada*  
4 2 2017 doi: 10.5489/cuaj.4486 [published Online First: 2017/11/07]  
5 3 66. Cottrell E, Roddy E, Rathod T, et al. Maximising response from GPs to questionnaire surveys: do  
6 4 length or incentives make a difference? *BMC medical research methodology* 2015;15:3. doi:  
7 5 10.1186/1471-2288-15-3 [published Online First: 2015/01/08]  
8 6 67. Rantanen J, Lehtinen S, Valenti A, et al. A global survey on occupational health services in  
9 7 selected international commission on occupational health (ICOH) member countries. *BMC*  
10 8 *Public Health* 2017;17(787) doi: doi:10.1186/s12889-017-4800-z.  
11 9

12 **Legends:**

13 Figure 1: Flow chart of participation in the Héraclès study, France, 2014  
14  
15  
16  
17  
18  
19  
20  
21  
22  
23  
24  
25  
26  
27  
28  
29  
30  
31  
32  
33  
34  
35  
36  
37  
38  
39  
40  
41  
42  
43  
44  
45  
46  
47  
48  
49  
50  
51  
52  
53  
54  
55  
56  
57  
58  
59  
60

For peer review only

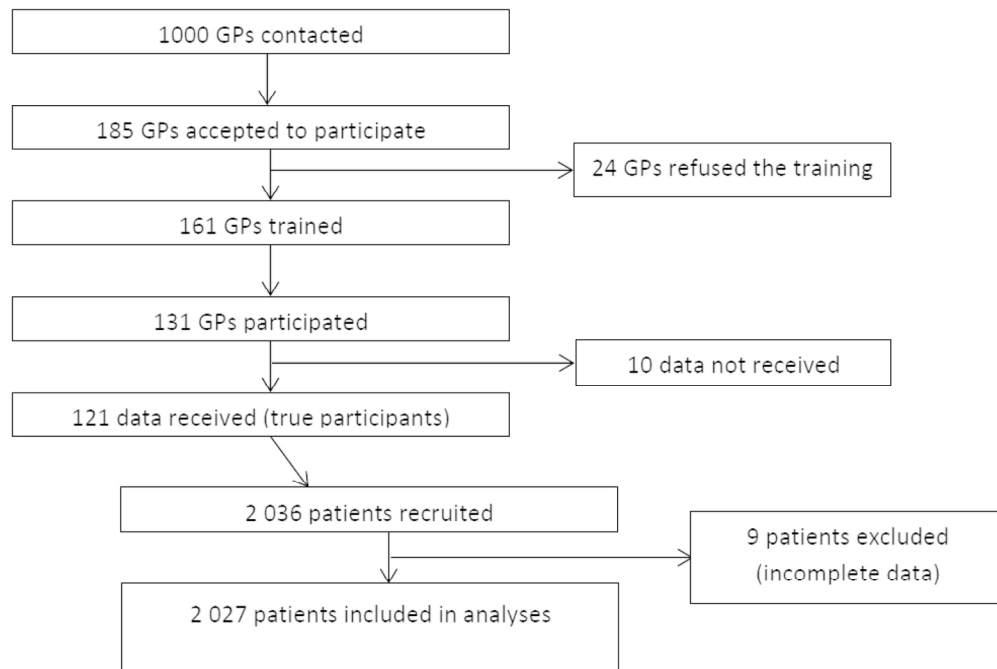

Flow chart of participation in the Heracles study, France, 2014

154x104mm (300 x 300 DPI)

**Appendix 1: Work's factor questionnaire****1) Work intensity**

- I receive contradictory orders or indication (“Yes”/”No”)
- I am asked excessive amounts of work (“Always”/”Often”/”Sometimes”/”Never”)
- I have too much to think about at work (“Always”/”Often”/”Sometimes”/”Never”)
- I have difficulties in balancing work and family life (“Always”/”Often”/”Sometimes”/”Never”)
- I have the time needed to do my work (“Always”/”Often”/”Sometimes”/”Never”)

**2) Emotional demands**

- I work in contact with customers/beneficiaries (“Yes”/”No”)
- I am in contact with people in distress (“Yes”/”No”)
- I have conflicts with customers/beneficiaries (“Always”/”Often”/”Sometimes”/”Never”)
- I have to hide my emotions and pretend to be in a good mood (“Always”/”Often”/”Sometimes”/”Never”)
- I sometimes experience fear during my work (“Always”/”Often”/”Sometimes”/”Never”)
- During my work, I am exposed to physical, verbal, psychological aggressions (“Always”/”Often”/”Sometimes”/”Never”)

**3) Autonomy**

- I have very little freedom to decide how I do my job (“Always”/”Often”/”Sometimes”/”Never”)
- I can fully employ my skills (“Always”/”Often”/”Sometimes”/”Never”)

**4) Conflict in values**

- I have the possibility to make a work of quality (“Always”/”Often”/”Sometimes”/”Never”)
- In my work, I have to do disapproved things (“Always”/”Often”/”Sometimes”/”Never”)

**5) Social relations at work**

- My work is fully recognized (“Always”/”Often”/”Sometimes”/”Never”)
- I have support from colleagues (“Always”/”Often”/”Sometimes”/”Never”)
- I have support from superior (“Always”/”Often”/”Sometimes”/”Never”)

**6) Insecurity of work**

- I feel able to do my current job until retirement (“Yes”/”No”)
- I work with fear of losing my job (“Always”/”Often”/”Sometimes”/”Never”)

**Appendix 2:** Correlation matrix of work characteristics, Héraclès study, France. 2014, Pearson correlation coefficient

|                          | Work intensity | Emotional demands | Autonomy | Conflict in values | Social relations at work | Insecurity |
|--------------------------|----------------|-------------------|----------|--------------------|--------------------------|------------|
| Work intensity           |                | 0.70              | -0.72    | 0.70               | -0.81                    | 0.08       |
| Emotional demands        | 0.70           |                   | -0.86    | 0.78               | -0.84                    | 0.23       |
| Autonomy                 | -0.72          | -0.86             |          | -0.91              | 0.87                     | -0.42      |
| Conflict in values       | 0.70           | 0.78              | -0.91    |                    | -0.91                    | 0.17       |
| Social relations at work | -0.81          | -0.84             | 0.87     | -0.91              |                          | -0.33      |
| Insecurity               | 0.08           | 0.23              | -0.42    | 0.17               | -0.33                    |            |

**Appendix 3:** major depressive disorders (MDD), generalized anxiety disorders (GAD) and alcohol abuse related factors adjusted on work related factors, Héraclès study, France, 2014. Multilevel regression models

|                                      | MDD GAD (n=1782) |               |       | Alcohol (n=1776) |               |       |
|--------------------------------------|------------------|---------------|-------|------------------|---------------|-------|
|                                      | RR <sup>1</sup>  | CI 95%        | P     | RR <sup>1</sup>  | CI 95%        | P     |
| <b>Age group</b>                     |                  |               | 0.38  |                  |               | 0.34  |
| [18 - 35]                            | 1 -              |               |       | 1 -              |               |       |
| [36 - 50]                            | 1.13             | [0.93 - 1.39] |       | 1.29             | [0.86 - 1.92] |       |
| [51 - 65]                            | 1.03             | [0.82 - 1.29] |       | 1.37             | [0.87 - 2.16] |       |
| <b>Gender</b>                        |                  |               | 0.34  |                  |               | <0.01 |
| Male                                 | 1 -              |               |       | 1 -              |               |       |
| Female                               | 1.09             | [0.91 - 1.31] |       | 0.37             | [0.25 - 0.53] |       |
| <b>Past unemployment</b>             |                  |               |       |                  |               | 0.13  |
| No                                   |                  |               |       | 1 -              |               |       |
| Yes                                  |                  |               |       | 1.30             | [0.93 - 1.83] |       |
| <b>Occupational grade</b>            |                  |               | 0.71  |                  |               | 0.09  |
| Blue collar                          | 1 -              |               |       | 1 -              |               |       |
| Pink collar                          | 1.12             | [0.86 - 1.46] |       | 0.61             | [0.39 - 0.98] |       |
| White collar                         | 1.11             | [0.82 - 1.5]  |       | 0.80             | [0.46 - 1.4]  |       |
| <b>Family status</b>                 |                  |               |       |                  |               | 0.11  |
| Lives alone                          |                  |               |       | 1 -              |               |       |
| Lives with partner or parents        |                  |               |       | 1.34             | [0.94 - 1.9]  |       |
| <b>Educational level</b>             |                  |               |       |                  |               | 0.51  |
| < High school degree                 |                  |               |       | 1 -              |               |       |
| ≥ High school degree                 |                  |               |       | 1.14             | [0.77 - 1.7]  |       |
| <b>Job instability</b>               |                  |               |       |                  |               | 0.21  |
| No                                   |                  |               |       | 1 -              |               |       |
| Yes                                  |                  |               |       | 1.31             | [0.86 - 1.98] |       |
| <b>Company size</b>                  |                  |               |       |                  |               | 0.02  |
| 1 to 10                              |                  |               |       | 1 -              |               |       |
| 11 to 49                             |                  |               |       | 0.70             | [0.45 - 1.09] |       |
| 50 to 250                            |                  |               |       | 0.83             | [0.52 - 1.3]  |       |
| 250 +                                |                  |               |       | 0.49             | [0.31 - 0.78] |       |
| <b>Past psychiatric problems</b>     |                  |               | <0.01 |                  |               | 0.02  |
| No                                   | 1 -              |               |       | 1 -              |               |       |
| Yes                                  | 1.58             | [1.27 - 1.96] |       | 1.65             | [1.07 - 2.55] |       |
| <b>Major depressive disorders</b>    |                  |               |       |                  |               | 0.01  |
| No                                   |                  |               |       | 1 -              |               |       |
| Yes                                  |                  |               |       | 1.66             | [1.12 - 2.44] |       |
| <b>Generalized anxiety disorders</b> |                  |               |       |                  |               | 0.25  |
| No                                   |                  |               |       | 1 -              |               |       |
| Yes                                  |                  |               |       | 1.24             | [0.86 - 1.8]  |       |
| <b>Alcohol</b>                       |                  |               | 0.01  |                  |               |       |
| No                                   | 1 -              |               |       |                  |               |       |
| Yes                                  | 1.38             | [1.09 - 1.75] |       |                  |               |       |
| <b>Material deprivation</b>          |                  |               | 0.04  |                  |               |       |
| No                                   | 1 -              |               |       |                  |               |       |
| Yes                                  | 1.19             | [1.01 - 1.4]  |       |                  |               |       |
| <b>GPs Gender</b>                    |                  |               | 0.02  |                  |               |       |
| Male                                 | 1 -              |               |       |                  |               |       |
| Female                               | 1.22             | [1.03 - 1.44] |       |                  |               |       |

RR : relative risk

<sup>1</sup> Adjusted on: Work intensity, Emotional demands, Autonomy, Conflict in values, Social relations at work, Insecurity

STROBE Statement—Checklist of items that should be included in reports of *cross-sectional studies*

|                              | Item No | Recommendation                                                                                                                                                                                                                                                                                                                                                                                                |
|------------------------------|---------|---------------------------------------------------------------------------------------------------------------------------------------------------------------------------------------------------------------------------------------------------------------------------------------------------------------------------------------------------------------------------------------------------------------|
| <b>Title and abstract</b>    | 1       | (a) Indicate the study's design with a commonly used term in the title or the abstract <b>page 1 and 2</b><br>(b) Provide in the abstract an informative and balanced summary of what was done and what was found - <b>page 1 and 2</b>                                                                                                                                                                       |
| <b>Introduction</b>          |         |                                                                                                                                                                                                                                                                                                                                                                                                               |
| Background/rationale         | 2       | Explain the scientific background and rationale for the investigation being reported <b>page 4 - 6</b>                                                                                                                                                                                                                                                                                                        |
| Objectives                   | 3       | State specific objectives, including any prespecified hypotheses - <b>page 4 - 6</b>                                                                                                                                                                                                                                                                                                                          |
| <b>Methods</b>               |         |                                                                                                                                                                                                                                                                                                                                                                                                               |
| Study design                 | 4       | Present key elements of study design early in the paper - <b>page 7</b>                                                                                                                                                                                                                                                                                                                                       |
| Setting                      | 5       | Describe the setting, locations, and relevant dates, including periods of recruitment, exposure, follow-up, and data collection - <b>page 7</b>                                                                                                                                                                                                                                                               |
| Participants                 | 6       | (a) Give the eligibility criteria, and the sources and methods of selection of participants - <b>page 7</b>                                                                                                                                                                                                                                                                                                   |
| Variables                    | 7       | Clearly define all outcomes, exposures, predictors, potential confounders, and effect modifiers. Give diagnostic criteria, if applicable – <b>page 8 to 10</b>                                                                                                                                                                                                                                                |
| Data sources/<br>measurement | 8*      | For each variable of interest, give sources of data and details of methods of assessment (measurement). Describe comparability of assessment methods if there is more than one group - <b>page 8 to 10</b>                                                                                                                                                                                                    |
| Bias                         | 9       | Describe any efforts to address potential sources of bias – <b>page 6</b>                                                                                                                                                                                                                                                                                                                                     |
| Study size                   | 10      | Explain how the study size was arrived at – <b>page 6</b>                                                                                                                                                                                                                                                                                                                                                     |
| Quantitative variables       | 11      | Explain how quantitative variables were handled in the analyses. If applicable, describe which groupings were chosen and why – <b>page 10 and 11</b>                                                                                                                                                                                                                                                          |
| Statistical methods          | 12      | (a) Describe all statistical methods, including those used to control for confounding <b>page 10 and 11</b><br>(b) Describe any methods used to examine subgroups and interactions<br>(c) Explain how missing data were addressed<br>(d) If applicable, describe analytical methods taking account of sampling strategy<br>(e) Describe any sensitivity analyses                                              |
| <b>Results</b>               |         |                                                                                                                                                                                                                                                                                                                                                                                                               |
| Participants                 | 13*     | (a) Report numbers of individuals at each stage of study—eg numbers potentially eligible, examined for eligibility, confirmed eligible, included in the study, completing follow-up, and analysed – <b>page 12 and figure 1</b><br>(b) Give reasons for non-participation at each stage – <b>figure 1</b><br>(c) Consider use of a flow diagram – <b>figure 1</b>                                             |
| Descriptive data             | 14*     | (a) Give characteristics of study participants (eg demographic, clinical, social) and information on exposures and potential confounders – <b>page 12 to 14</b><br>(b) Indicate number of participants with missing data for each variable of interest                                                                                                                                                        |
| Outcome data                 | 15*     | Report numbers of outcome events or summary measures – <b>page 15</b>                                                                                                                                                                                                                                                                                                                                         |
| Main results                 | 16      | (a) Give unadjusted estimates and, if applicable, confounder-adjusted estimates and their precision (eg, 95% confidence interval). Make clear which confounders were adjusted for and why they were included – <b>page 15 to 19</b><br>(b) Report category boundaries when continuous variables were categorized<br>(c) If relevant, consider translating estimates of relative risk into absolute risk for a |



|                          |    |                                                                                                                                                                                                   |
|--------------------------|----|---------------------------------------------------------------------------------------------------------------------------------------------------------------------------------------------------|
|                          |    | meaningful time period                                                                                                                                                                            |
| Other analyses           | 17 | Report other analyses done—eg analyses of subgroups and interactions, and sensitivity analyses                                                                                                    |
| <b>Discussion</b>        |    |                                                                                                                                                                                                   |
| Key results              | 18 | Summarise key results with reference to study objectives – <b>page 20</b>                                                                                                                         |
| Limitations              | 19 | Discuss limitations of the study, taking into account sources of potential bias or imprecision. Discuss both direction and magnitude of any potential bias – <b>page 21 to 23</b>                 |
| Interpretation           | 20 | Give a cautious overall interpretation of results considering objectives, limitations, multiplicity of analyses, results from similar studies, and other relevant evidence – <b>page 21 to 23</b> |
| Generalisability         | 21 | Discuss the generalisability (external validity) of the study results – <b>page 20 and 21</b>                                                                                                     |
| <b>Other information</b> |    |                                                                                                                                                                                                   |
| Funding                  | 22 | Give the source of funding and the role of the funders for the present study and, if applicable, for the original study on which the present article is based – <b>page 24</b>                    |

\*Give information separately for exposed and unexposed groups.

**Note:** An Explanation and Elaboration article discusses each checklist item and gives methodological background and published examples of transparent reporting. The STROBE checklist is best used in conjunction with this article (freely available on the Web sites of PLoS Medicine at <http://www.plosmedicine.org/>, Annals of Internal Medicine at <http://www.annals.org/>, and Epidemiology at <http://www.epidem.com/>). Information on the STROBE Initiative is available at [www.strobe-statement.org](http://www.strobe-statement.org).
