# Supplementary material for: Which work-related characteristics are most strongly associated with common mental disorders? A cross-sectional study
Source: PubMed Central journal article supplement — BMJ Open. 2018 Aug 5;8(8):e020770. doi: 10.1136/bmjopen-2017-020770 (PMC6078252; doi:10.1136/bmjopen-2017-020770), 2018-08-05
Supplement: bmjopen-2017-020770supp002.pdf [file bmjopen-2017-020770supp002.pdf]

**Appendix 2:** Correlation matrix of work characteristics, Héraclès study, France. 2014, Pearson correlation coefficient

|                          | Work intensity | Emotional demands | Autonomy | Conflict in values | Social relations at work | Insecurity |
|--------------------------|----------------|-------------------|----------|--------------------|--------------------------|------------|
| Work intensity           |                | 0.70              | -0.72    | 0.70               | -0.81                    | 0.08       |
| Emotional demands        | 0.70           |                   | -0.86    | 0.78               | -0.84                    | 0.23       |
| Autonomy                 | -0.72          | -0.86             |          | -0.91              | 0.87                     | -0.42      |
| Conflict in values       | 0.70           | 0.78              | -0.91    |                    | -0.91                    | 0.17       |
| Social relations at work | -0.81          | -0.84             | 0.87     | -0.91              |                          | -0.33      |
| Insecurity               | 0.08           | 0.23              | -0.42    | 0.17               | -0.33                    |            |
