# Supplementary material for: Which work-related characteristics are most strongly associated with common mental disorders? A cross-sectional study
Source: PubMed Central journal article supplement — BMJ Open. 2018 Aug 5;8(8):e020770. doi: 10.1136/bmjopen-2017-020770 (PMC6078252; doi:10.1136/bmjopen-2017-020770), 2018-08-05
Supplement: bmjopen-2017-020770supp003.pdf [file bmjopen-2017-020770supp003.pdf]

**Appendix 3:** major depressive disorders (MDD), generalized anxiety disorders (GAD) and alcohol abuse related factors adjusted on work related factors, Héraclès study, France, 2014. Multilevel regression models

|                                      | MDD GAD (n=1782) |               |       | Alcohol (n=1776) |               |       |
|--------------------------------------|------------------|---------------|-------|------------------|---------------|-------|
|                                      | RR <sup>1</sup>  | CI 95%        | P     | RR <sup>1</sup>  | CI 95%        | P     |
| <b>Age group</b>                     |                  |               | 0.38  |                  |               | 0.34  |
| [18 - 35]                            | 1 -              |               |       | 1 -              |               |       |
| [36 - 50]                            | 1.13             | [0.93 - 1.39] |       | 1.29             | [0.86 - 1.92] |       |
| [51 - 65]                            | 1.03             | [0.82 - 1.29] |       | 1.37             | [0.87 - 2.16] |       |
| <b>Gender</b>                        |                  |               | 0.34  |                  |               | <0.01 |
| Male                                 | 1 -              |               |       | 1 -              |               |       |
| Female                               | 1.09             | [0.91 - 1.31] |       | 0.37             | [0.25 - 0.53] |       |
| <b>Past unemployment</b>             |                  |               |       |                  |               | 0.13  |
| No                                   |                  |               |       | 1 -              |               |       |
| Yes                                  |                  |               |       | 1.30             | [0.93 - 1.83] |       |
| <b>Occupational grade</b>            |                  |               | 0.71  |                  |               | 0.09  |
| Blue collar                          | 1 -              |               |       | 1 -              |               |       |
| Pink collar                          | 1.12             | [0.86 - 1.46] |       | 0.61             | [0.39 - 0.98] |       |
| White collar                         | 1.11             | [0.82 - 1.5]  |       | 0.80             | [0.46 - 1.4]  |       |
| <b>Family status</b>                 |                  |               |       |                  |               | 0.11  |
| Lives alone                          |                  |               |       | 1 -              |               |       |
| Lives with partner or parents        |                  |               |       | 1.34             | [0.94 - 1.9]  |       |
| <b>Educational level</b>             |                  |               |       |                  |               | 0.51  |
| < High school degree                 |                  |               |       | 1 -              |               |       |
| ≥ High school degree                 |                  |               |       | 1.14             | [0.77 - 1.7]  |       |
| <b>Job instability</b>               |                  |               |       |                  |               | 0.21  |
| No                                   |                  |               |       | 1 -              |               |       |
| Yes                                  |                  |               |       | 1.31             | [0.86 - 1.98] |       |
| <b>Company size</b>                  |                  |               |       |                  |               | 0.02  |
| 1 to 10                              |                  |               |       | 1 -              |               |       |
| 11 to 49                             |                  |               |       | 0.70             | [0.45 - 1.09] |       |
| 50 to 250                            |                  |               |       | 0.83             | [0.52 - 1.3]  |       |
| 250 +                                |                  |               |       | 0.49             | [0.31 - 0.78] |       |
| <b>Past psychiatric problems</b>     |                  |               | <0.01 |                  |               | 0.02  |
| No                                   | 1 -              |               |       | 1 -              |               |       |
| Yes                                  | 1.58             | [1.27 - 1.96] |       | 1.65             | [1.07 - 2.55] |       |
| <b>Major depressive disorders</b>    |                  |               |       |                  |               | 0.01  |
| No                                   |                  |               |       | 1 -              |               |       |
| Yes                                  |                  |               |       | 1.66             | [1.12 - 2.44] |       |
| <b>Generalized anxiety disorders</b> |                  |               |       |                  |               | 0.25  |
| No                                   |                  |               |       | 1 -              |               |       |
| Yes                                  |                  |               |       | 1.24             | [0.86 - 1.8]  |       |
| <b>Alcohol</b>                       |                  |               | 0.01  |                  |               |       |
| No                                   | 1 -              |               |       |                  |               |       |
| Yes                                  | 1.38             | [1.09 - 1.75] |       |                  |               |       |
| <b>Material deprivation</b>          |                  |               | 0.04  |                  |               |       |
| No                                   | 1 -              |               |       |                  |               |       |
| Yes                                  | 1.19             | [1.01 - 1.4]  |       |                  |               |       |
| <b>GPs Gender</b>                    |                  |               | 0.02  |                  |               |       |
| Male                                 | 1 -              |               |       |                  |               |       |
| Female                               | 1.22             | [1.03 - 1.44] |       |                  |               |       |

RR : relative risk

<sup>1</sup> Adjusted on: Work intensity, Emotional demands, Autonomy, Conflict in values, Social relations at work, Insecurity
